# Supplementary material for: Quality of maternal and newborn health care in Ethiopia: a cross-sectional study
Source: PubMed Central journal article supplement (PMC8272353; doi:10.1186/s12913-021-06680-1), 2021-07-10
Supplement: 12913_2021_6680_MOESM1_ESM.pdf [file 12913_2021_6680_MOESM1_ESM.pdf]

## Health Center and Hospital Baseline Assessment Tool

### Section 1. General Information

Name of Facility: .....

Type of Facility:      1. Health Center                       2. Hospital

Region: .....      Zone: .....      Woreda: .....

Telephone (landline): .....

Facility Head Name: .....      Facility head cell phone .....

Respondent Name: .....      Respondent position: .....

List health facilities (health post, health center) in your catchment:

|    |     |
|----|-----|
| 1. | 6.  |
| 2. | 7.  |
| 3. | 8.  |
| 4. | 9.  |
| 5. | 10. |

Population Size:

|                      | 2008 EFY | 2009EFY |
|----------------------|----------|---------|
| Total Population     |          |         |
| Expected Pregnancies |          |         |
| Expected deliveries  |          |         |
| Surviving infants    |          |         |

Date of assessment: \_\_\_\_\_

Name of Assessors:

1. \_\_\_\_\_
2. \_\_\_\_\_
3. \_\_\_\_\_

Section 2. Staffing

Respondent Name: ..... Respondent position: .....

| Total number of staffs  |     |         |
|-------------------------|-----|---------|
| Technical Staff         | No. | Remarks |
| Specialist doctors      |     |         |
| General practitioners   |     |         |
| IESO                    |     |         |
| Anesthetists            |     |         |
| Health officers         |     |         |
| Nurses                  |     |         |
| Midwives                |     |         |
| Laboratory personnel    |     |         |
| Pharmacy personnel      |     |         |
| <b>Supportive staff</b> |     |         |
| Data personnel          |     |         |
| Cleaners                |     |         |
| Other supportive staff  |     |         |
| <b>Total</b>            |     |         |

| Training topic(s)                              | Total Trained | Trained L&D or MNCH | Remarks |
|------------------------------------------------|---------------|---------------------|---------|
| CEmONC                                         |               |                     |         |
| BEmONC                                         |               |                     |         |
| IMNCI                                          |               |                     |         |
| PMTCT                                          |               |                     |         |
| HBB                                            |               |                     |         |
| Comprehensive Post Abortion Care (CPAC)        |               |                     |         |
| Long Acting Family Planning                    |               |                     |         |
| Comprehensive Family Planning                  |               |                     |         |
| Essential New Born Care (ENBC)                 |               |                     |         |
| NICU                                           |               |                     |         |
| Non-pneumatic Anti-shock Garment (NASG)        |               |                     |         |
| Quality Improvement/Quality Assurance Training |               |                     |         |
| Data Quality Training                          |               |                     |         |
| Other Trainings relevant for MNH:              |               |                     |         |
| -                                              |               |                     |         |
| -                                              |               |                     |         |
| -                                              |               |                     |         |

Section 3. Patient Feedback Mechanism

Respondent Name: ..... Respondent position: .....

|                                                                                                                                                                                                     | Yes – 1<br>No - 0 | Remarks |
|-----------------------------------------------------------------------------------------------------------------------------------------------------------------------------------------------------|-------------------|---------|
| Has your facility had a patient satisfaction survey completed in the last 6 months? (please ask the frequency)                                                                                      |                   |         |
| Can you please share the results of patient satisfaction survey or feedback from clients/family/community with us? Document the last 1 year result.<br>NB: Please collect results if can be shared. |                   |         |
| Do you use suggestion box?                                                                                                                                                                          |                   |         |
| If Yes, how often do you review it?                                                                                                                                                                 |                   |         |
| Do you have other means of getting feedback from clients, family & community?<br>If yes, describe.                                                                                                  |                   |         |
| Is there a Patients’ Rights Charter for the facility?                                                                                                                                               |                   |         |
| Visibly placed to guide staff & patients?                                                                                                                                                           |                   |         |

Section 4. Death & near-miss audits

Respondent Name: ..... Respondent position: .....

| Do you carry out the following audits in your facility? | Yes – 1<br>No - 0 | Remarks |
|---------------------------------------------------------|-------------------|---------|
| • Maternal death surveillance and response              |                   |         |
| • Neonatal death audits?                                |                   |         |
| • Perinatal death audits?                               |                   |         |
| • Near-miss audits?                                     |                   |         |
|                                                         |                   |         |

Section 5. Referral Process

Respondent Name: ..... Respondent position: .....

|                                                                                       | Yes - 1<br>No - 0 | Remark |
|---------------------------------------------------------------------------------------|-------------------|--------|
| Functional contact numbers for referral centers                                       |                   |        |
| Functional, Well-equipped Ambulance<br>If no, alternative means of patient transport? |                   |        |
| Liaison officer / referral focal person                                               |                   |        |

Section 6. Existing Quality Improvement (QI) structure and initiatives in the facility

Respondent Name: ..... Respondent position: .....

|                                                                                                                                                          | Yes – 1<br>No - 0 | Comment |
|----------------------------------------------------------------------------------------------------------------------------------------------------------|-------------------|---------|
| Has there been any QI initiative in this facility in the past 1 year?<br><br>If yes, provide brief detail or list of the initiatives in comment section. |                   |         |
| Is there a QI team in the facility? (If Yes, please list the designations of the team members – use comment section)                                     |                   |         |
| How frequently does the team meet?                                                                                                                       |                   |         |
| Is there an external organization or unit supporting the QI work in your facility? [If Yes, provide name(s) in comment section]                          |                   |         |

Section 7. Supportive supervision

Respondent Name: ..... Respondent position: .....

|                                                                                                                     | Yes – 1<br>No - 0 | Remarks |
|---------------------------------------------------------------------------------------------------------------------|-------------------|---------|
| Is there regular supportive supervision from HC to HP (hospital to HC) for MNH program? (refers to clinical aspect) |                   |         |
| If yes, how frequent it is?                                                                                         |                   |         |
| If yes, have you used MNH program checklist?                                                                        |                   |         |
| If yes, were feedbacks given? (please check the feedback document)                                                  |                   |         |

Section 8. Review meetings (Please check the minute book)

Respondent Name: ..... Respondent position: .....

|                                                                                                                | Yes - 1<br>No - 0 | Remarks |
|----------------------------------------------------------------------------------------------------------------|-------------------|---------|
| How many monthly PHCU review meetings were conducted at Hospital/PHCU level in 2008EFY? (please put in number) |                   |         |
| Was MNH program discussed?                                                                                     |                   |         |
| Were the HEWs participated?                                                                                    |                   |         |
| Were the health center staff participated? (Hospital)                                                          |                   |         |
| Were the minutes taken?                                                                                        |                   |         |
| Was an action plan developed following the performance review?                                                 |                   |         |

Section 9. Data quality

Respondent Name: ..... Respondent position: .....

|                                        | Yes -1<br>No - 0 | Remarks |
|----------------------------------------|------------------|---------|
| Is there data quality checking system? |                  |         |
| If yes, how frequent?                  |                  |         |

Section 10. Local Partners working in the Facility

Respondent Name: ..... Respondent position: .....

|   | Name of Organization | Area/Project | Contact details/Remarks |
|---|----------------------|--------------|-------------------------|
| 1 |                      |              |                         |
| 2 |                      |              |                         |
| 3 |                      |              |                         |
| 4 |                      |              |                         |
| 5 |                      |              |                         |
|   |                      |              |                         |
|   |                      |              |                         |

Section 11. Infrastructure and Environment

Respondent Name: ..... Respondent position: .....

Score the level of cleanliness and organization of the following units (1-3 scale – see Operational Definition)

|                        | Scale /score | Remarks |
|------------------------|--------------|---------|
| Overall compound       |              |         |
| MCH OPD (ANC)          |              |         |
| Wards (maternity ward) |              |         |
| Labour/delivery room   |              |         |
| Operation Theatre      |              |         |
| Pharmacy               |              |         |
| Laboratory             |              |         |
| Toilets                |              |         |

|                                                               | Yes -1<br>No - 0                                           | Comments: |
|---------------------------------------------------------------|------------------------------------------------------------|-----------|
| Facility has functional incinerator                           |                                                            |           |
| Facility has functional placenta pit                          |                                                            |           |
| Does the facility have electric power supply                  |                                                            |           |
| What is the source of power supply?                           | 0. Power Grid/Line<br>1. Generator<br>2. Solar<br>3. Other |           |
| Is there also back-up power supply?                           |                                                            |           |
| On average, how many hours is the power supply running? ..... |                                                            |           |

|                                                               |                                                                               |  |
|---------------------------------------------------------------|-------------------------------------------------------------------------------|--|
| What is the source of water?                                  | 0. Pipe water<br>1. Hand pump<br>2. Well<br>3. Spring<br>4. River<br>5. Other |  |
| Is there a back water reservoir (tanker) within the facility? | 1- Yes<br>0. No                                                               |  |

## Section 12. ANC

Respondent Name: ..... Respondent position: .....

| Equipment list - ANC                 | Number | Remark |
|--------------------------------------|--------|--------|
| Examination couch                    |        |        |
| Weighing scales (Adult)              |        |        |
| Blood pressure apparatus             |        |        |
| Stethoscope                          |        |        |
| Thermometer                          |        |        |
| Fetoscope / Doppler                  |        |        |
| Clean Linen for examination coach    |        |        |
| Height measurement board             |        |        |
| Fundal height measurement tape       |        |        |
| Gestation calendar/gestational wheel |        |        |
| Ultrasound machine                   |        |        |
| HIV test kit                         |        |        |

| Protocols:                                | Available<br>Yes – 1<br>No - 0 | Utilized<br>Yes – 1<br>No - 0 | Remarks |
|-------------------------------------------|--------------------------------|-------------------------------|---------|
| PMTCT guidelines                          |                                |                               |         |
| Focused ANC poster                        |                                |                               |         |
| Infection prevention and control protocol |                                |                               |         |

| Infection Prevention - ANC                      | Yes – 1<br>No - 0 | Remark |
|-------------------------------------------------|-------------------|--------|
| Is there written infection prevention protocol? |                   |        |
| Running water                                   |                   |        |
| Soap                                            |                   |        |
| Personal towel for drying                       |                   |        |
| Alcohol hand rub                                |                   |        |

| Drugs - ANC          | Available<br>Yes – 1, No - 0 | Stock out in past 3<br>months (yes – 1, No – 0) | Remarks |
|----------------------|------------------------------|-------------------------------------------------|---------|
| Iron                 |                              |                                                 |         |
| Folic acid           |                              |                                                 |         |
| Antimalarials        |                              |                                                 |         |
| TT vaccine           |                              |                                                 |         |
| Antiretroviral drugs |                              |                                                 |         |
| Nevirapine syrup     |                              |                                                 |         |
| Mebendazole          |                              |                                                 |         |

Section 13. Delivery Unit

Respondent Name: ..... Respondent position: .....

|                                                                                   | Yes – 1<br>No - 0 | Remarks |
|-----------------------------------------------------------------------------------|-------------------|---------|
| Is there a designated space for KMC?                                              |                   |         |
| Is there Newborn corner in the delivery room?                                     |                   |         |
| Is there NICU in the facility?                                                    |                   |         |
| Is there an ambulance which serves the facility?                                  |                   |         |
| Describe the situation (functionality, fuel and adequacy, alternative mechanisms) |                   |         |
| _____                                                                             |                   |         |
| _____                                                                             |                   |         |

| Equipment List - Delivery                                                                                                     | Number | Remarks |
|-------------------------------------------------------------------------------------------------------------------------------|--------|---------|
| Weighing scales (New born with 50gm precision)                                                                                |        |         |
| Admission                                                                                                                     |        |         |
| Recovery Beds                                                                                                                 |        |         |
| Delivery couch                                                                                                                |        |         |
| Delivery light                                                                                                                |        |         |
| Number of complete delivery sets (Kidney dish, forceps, gauze swabs, Scissors, pads, cord tie/clips)                          |        |         |
| Towel for drying and wrapping                                                                                                 |        |         |
| Baby hat                                                                                                                      |        |         |
| Number of Vaginal Speculums                                                                                                   |        |         |
| Number of Tear/episiotomy repair sets (Swabs, Cotton, episiotomy scissors, needle holders, drape-toothed/non-toothed forceps) |        |         |
| Bulb/pigeon suction                                                                                                           |        |         |
| Suction machine                                                                                                               |        |         |
| Ambu bag & face masks (adult)                                                                                                 |        |         |
| Ambu bag & face masks (neonatal- size 0)                                                                                      |        |         |
| Ambu bag & face masks (neonatal- size 1)                                                                                      |        |         |
| Heater                                                                                                                        |        |         |
| Radiant warmer                                                                                                                |        |         |
| Incubator                                                                                                                     |        |         |



| <b>Equipment list - Delivery</b>     | <b>Number</b> | <b>Remark</b> |
|--------------------------------------|---------------|---------------|
| Phototherapy light/unit              |               |               |
| Nasal catheter                       |               |               |
| Nasogastric tubes size 5-8           |               |               |
| Urethral catheter                    |               |               |
| Oxygen concentrator                  |               |               |
| Oxygen cylinder                      |               |               |
| Respiratory rate timer (Wall watch)  |               |               |
| Tongue depressors (describe type)    |               |               |
| Guedel (oropharyngeal) airway        |               |               |
| Cannulae (different sizes)           |               |               |
| Support Binder for KMC<br>(KMC wrap) |               |               |
| Feeding cups                         |               |               |
| Breast pump                          |               |               |
| Blood sugar testing sticks           |               |               |
| Blood specimen bottles               |               |               |
| Urine specimen bottles               |               |               |
| HIV test kit                         |               |               |

| <b>Infection Prevention – Labor &amp; Delivery</b>                                                                                                                                                         | <b>Yes – 1<br/>No - 0</b> | <b>Remark</b> |
|------------------------------------------------------------------------------------------------------------------------------------------------------------------------------------------------------------|---------------------------|---------------|
| Is there written infection prevention protocol?                                                                                                                                                            |                           |               |
| Running water                                                                                                                                                                                              |                           |               |
| Soap                                                                                                                                                                                                       |                           |               |
| Personal towel for drying                                                                                                                                                                                  |                           |               |
| Alcohol hand rub                                                                                                                                                                                           |                           |               |
| Eye google                                                                                                                                                                                                 |                           |               |
| Apron                                                                                                                                                                                                      |                           |               |
| Boots                                                                                                                                                                                                      |                           |               |
| Face mask                                                                                                                                                                                                  |                           |               |
| Cape                                                                                                                                                                                                       |                           |               |
| Elbow length glove (sterile )                                                                                                                                                                              |                           |               |
| Do they use triple buckle system? <ul style="list-style-type: none"> <li>○ 0.5% chlorine solution for decontamination</li> <li>○ Soapy water for rinsing</li> <li>○ Clean water further rinsing</li> </ul> |                           |               |

|                                                                                                      |  |  |
|------------------------------------------------------------------------------------------------------|--|--|
| Use three buckets for solid waste segregation (Red, Yellow, Black)                                   |  |  |
| Safety box for sharp materials                                                                       |  |  |
| Autoclave                                                                                            |  |  |
| Sterilization drums                                                                                  |  |  |
| Heavy duty gloves for cleaners                                                                       |  |  |
| Bin liners (plastic liner)                                                                           |  |  |
| Antiseptics                                                                                          |  |  |
| Brooms, Brushes etc for cleaning equipment                                                           |  |  |
| Sufficient bed linens and theatre drapes                                                             |  |  |
| Demarcated sterilization area for washing & decontamination, packing of instruments and autoclaving. |  |  |

| <b>Protocols – Labor and Delivery</b>                                            | <b>Available<br/>Yes – 1<br/>No – 0</b> | <b>Utilized<br/>Yes – 1<br/>No – 0</b> | <b>Remarks</b> |
|----------------------------------------------------------------------------------|-----------------------------------------|----------------------------------------|----------------|
| Management Protocol on Selected Obstetrics Topics for Health Centers, 2010       |                                         |                                        |                |
| MgSO4 administration protocol                                                    |                                         |                                        |                |
| BEmONC/CEmONC training manual                                                    |                                         |                                        |                |
| Technical and procedural guidelines for safe abortion services in Ethiopia, 2014 |                                         |                                        |                |
| Essential newborn care guideline                                                 |                                         |                                        |                |
| Integrate management of newborn and child illness                                |                                         |                                        |                |
| Newborn resuscitation flow chart (HBB poster)                                    |                                         |                                        |                |
| Newborn corner guideline                                                         |                                         |                                        |                |
| AMTSL poster                                                                     |                                         |                                        |                |
| National newborn case management protocol                                        |                                         |                                        |                |
| Neonatal intensive care unit guide                                               |                                         |                                        |                |
| Infection prevention and control protocol                                        |                                         |                                        |                |

Section 14. Operating Theatre

Respondent Name: ..... Respondent position: .....

| Equipment List - Operating theatre            | Number | Remark |
|-----------------------------------------------|--------|--------|
| Oxygen concentrator/Oxygen cylinder           |        |        |
| Pulse oxymeters                               |        |        |
| Infant resuscitation table                    |        |        |
| Suction machine (state Manual or Electric)    |        |        |
| Ambu bag & face masks (adult)                 |        |        |
| Ambu bag & face masks neonatal size(0)        |        |        |
| Ambu bag & face mask size(1)                  |        |        |
| Adjustable Operating table                    |        |        |
| Operating light (UPS back-up?)                |        |        |
| If operating light available, what condition? |        |        |
| Number of C-section sets                      |        |        |
| Number of Laparatomy sets                     |        |        |
| Number of hysterectomy sets                   |        |        |
| Number of evacuation sets                     |        |        |
| Air-conditioner                               |        |        |

Section 15. Pharmacy

Respondent Name: ..... Respondent position: .....

| <b>Drug availability - Pharmacy</b>                |                                  | <b>Available</b><br><b>Yes – 1</b><br><b>No - 0</b> | <b>Stock out in</b><br><b>past 3 months</b><br><b>Yes -1, No - 0</b> | <b>Remarks</b> |
|----------------------------------------------------|----------------------------------|-----------------------------------------------------|----------------------------------------------------------------------|----------------|
| Dexamethasone/bethamethasone IV                    |                                  |                                                     |                                                                      |                |
| Hydrocortisone IV                                  |                                  |                                                     |                                                                      |                |
| Analgesics PO                                      |                                  |                                                     |                                                                      |                |
| Analgesics IM                                      |                                  |                                                     |                                                                      |                |
| 40% glucose                                        |                                  |                                                     |                                                                      |                |
| <b>Antihypertensives</b>                           | Methyldopa- 1 <sup>st</sup> line |                                                     |                                                                      |                |
|                                                    | Labetalol                        |                                                     |                                                                      |                |
|                                                    | Hydralazine                      |                                                     |                                                                      |                |
|                                                    | Nifedipine                       |                                                     |                                                                      |                |
| <b>Antidiabetic for GDM (Insulin)</b>              |                                  |                                                     |                                                                      |                |
| Miconazole Vaginal pessary                         |                                  |                                                     |                                                                      |                |
| Neomycin + Polymixin B + Nystatin Tablet (vaginal) |                                  |                                                     |                                                                      |                |
| <b>ANTIBIOTICS</b>                                 |                                  |                                                     |                                                                      |                |
| Ampicillin (IV)                                    |                                  |                                                     |                                                                      |                |
| Amoxicillin (PO)                                   |                                  |                                                     |                                                                      |                |
| Erythromycin (PO)                                  |                                  |                                                     |                                                                      |                |
| Gentamycin (IV)                                    |                                  |                                                     |                                                                      |                |
| Metronidazole (IV)                                 |                                  |                                                     |                                                                      |                |
| Pen G                                              |                                  |                                                     |                                                                      |                |
| Ceftriaxone                                        |                                  |                                                     |                                                                      |                |
| TTC eye ointment                                   |                                  |                                                     |                                                                      |                |
| <b>Others</b>                                      |                                  |                                                     |                                                                      |                |
| Vitamin K                                          |                                  |                                                     |                                                                      |                |
| MgSO4                                              |                                  |                                                     |                                                                      |                |
| Diazepam                                           |                                  |                                                     |                                                                      |                |
| Calcium gluconate                                  |                                  |                                                     |                                                                      |                |
| Oxytocin                                           |                                  |                                                     |                                                                      |                |
| Ergometrine                                        |                                  |                                                     |                                                                      |                |
| Misoprostol                                        |                                  |                                                     |                                                                      |                |
| Pethidine                                          |                                  |                                                     |                                                                      |                |
| Naloxone                                           |                                  |                                                     |                                                                      |                |
| Adrenaline                                         |                                  |                                                     |                                                                      |                |

| <b>Drug availability - Pharmacy</b> | <b>Available<br/>Yes – 1<br/>No - 0</b> | <b>Stock out in<br/>past 3 months<br/>Yes -1, No - 0</b> | <b>Remarks</b> |
|-------------------------------------|-----------------------------------------|----------------------------------------------------------|----------------|
| Aminophylline                       |                                         |                                                          |                |
| Salbutamol                          |                                         |                                                          |                |
| Ketamine                            |                                         |                                                          |                |
| Lidocaine/Lignocaine                |                                         |                                                          |                |
| Atropine                            |                                         |                                                          |                |
| <b>FLUIDS</b>                       |                                         |                                                          |                |
| Normal saline                       |                                         |                                                          |                |
| 5% dextrose                         |                                         |                                                          |                |
| Ringers lactate                     |                                         |                                                          |                |
| <b>CONTRACEPTIVES</b>               |                                         |                                                          |                |
| Condoms                             |                                         |                                                          |                |
| Oral contraceptives                 |                                         |                                                          |                |
| Emergency contraception             |                                         |                                                          |                |
| Hormonal injections                 |                                         |                                                          |                |
| Implants                            |                                         |                                                          |                |
| Intrauterine devices                |                                         |                                                          |                |
| <b>RAPID Diagnostic Test Kits</b>   |                                         |                                                          |                |
| HIV test kits                       |                                         |                                                          |                |
| Syphilis test kits                  |                                         |                                                          |                |

Section 16. Laboratory

Respondent Name: ..... Respondent position: .....

|                           | Yes – 1<br>No - 0 | Remarks: |
|---------------------------|-------------------|----------|
| Blood glucose             |                   |          |
| Haemoglobin               |                   |          |
| Haematocrit (PCV)         |                   |          |
| Urine dipstick            |                   |          |
| Urine microscopy          |                   |          |
| Microscopy for malaria    |                   |          |
| VDRL/RPR                  |                   |          |
| Blood Group               |                   |          |
| HIV test Kit              |                   |          |
| <b>Only for hospitals</b> |                   |          |
| Full blood count          |                   |          |
| Liver function tests      |                   |          |
| Renal function tests      |                   |          |
| Serum electrolytes        |                   |          |
| CD4 count                 |                   |          |
| HIV plasma viral loads    |                   |          |
| Blood culture             |                   |          |
| Cross match               |                   |          |
| Bilirubin                 |                   |          |
| CSF microscopy            |                   |          |
| HBsAg                     |                   |          |

Section 17. MNH M&E Tools

Respondent Name: ..... Respondent position: .....

| Data collection tools                 | Available<br>Yes – 1<br>No - 0 | Utilized<br>Yes – 1<br>No - 0 | Remarks |
|---------------------------------------|--------------------------------|-------------------------------|---------|
| Individual patient folders and sheets |                                |                               |         |
| Registers:                            |                                |                               |         |
| - ANC                                 |                                |                               |         |
| - Labour & Delivery                   |                                |                               |         |
| - PNC                                 |                                |                               |         |
| - Family Planning                     |                                |                               |         |
| - Abortion Care                       |                                |                               |         |
| - PMTCT                               |                                |                               |         |
| - Referral                            |                                |                               |         |
| Tallies Report Formats:               |                                |                               |         |
| - ANC Tally Sheet                     |                                |                               |         |
| - FP Tally Sheet                      |                                |                               |         |
| - Integrated Maternal & Neonatal Card |                                |                               |         |
| - Monthly Report Format               |                                |                               |         |
| - Quarterly Report Format             |                                |                               |         |
| - Annual Report Format                |                                |                               |         |
| Other Templates:                      |                                |                               |         |
| - Partograph                          |                                |                               |         |
| - Cardex /Drug chart                  |                                |                               |         |
| - Stock card                          |                                |                               |         |
| - Bin card                            |                                |                               |         |

Section 18. HMIS Data + Validation (register review)

| Indicator                                                                                 | HMIS  |       |       |       |        |        |       |       |       |       |       |       | Validation |       |       |       |  |
|-------------------------------------------------------------------------------------------|-------|-------|-------|-------|--------|--------|-------|-------|-------|-------|-------|-------|------------|-------|-------|-------|--|
|                                                                                           | May16 | Jun16 | Jul16 | Aug16 | Sept16 | Oct 16 | Nov16 | Dec16 | Jan17 | Feb17 | Mar17 | Apr17 | Jan17      | Feb17 | Mar17 | Apr17 |  |
| Number of pregnant women with at least one ANC visit (H/HC 1.1.2.1)                       |       |       |       |       |        |        |       |       |       |       |       |       |            |       |       |       |  |
| Number of pregnant women that received antenatal care at least four visits (H/HC 1.1.3.1) |       |       |       |       |        |        |       |       |       |       |       |       |            |       |       |       |  |
| Number of pregnant women tested for syphilis (H/HC 1.1.4.1)                               |       |       |       |       |        |        |       |       |       |       |       |       |            |       |       |       |  |
| Total number of births attended by skilled health attendants (H/HC C.1.1.5.1)             |       |       |       |       |        |        |       |       |       |       |       |       |            |       |       |       |  |
| Number of postnatal visits within 48 hours of delivery (H/HC 1.1.7.1)                     |       |       |       |       |        |        |       |       |       |       |       |       |            |       |       |       |  |
| Number of postnatal visits within 2-3 days of delivery (H/HC 1.1.7.2,)                    |       |       |       |       |        |        |       |       |       |       |       |       |            |       |       |       |  |
| Number of postnatal visits within 4-7 days of delivery (H/HC 1.1.7.3,)                    |       |       |       |       |        |        |       |       |       |       |       |       |            |       |       |       |  |
| Number of maternal deaths in health facility (H/HC C1.1.1.10.1)                           |       |       |       |       |        |        |       |       |       |       |       |       |            |       |       |       |  |
| Number of stillbirths (H/HC/ 1.1.12.1)                                                    |       |       |       |       |        |        |       |       |       |       |       |       |            |       |       |       |  |
| Number of live births (H/HC/ 1.1.12.2)                                                    |       |       |       |       |        |        |       |       |       |       |       |       |            |       |       |       |  |
| Number of babies born in a facility who were pre-term at or under 2500g at birth          |       |       |       |       |        |        |       |       |       |       |       |       |            |       |       |       |  |
| Number of neonatal deaths in the first 24hrs of life (institutional)                      |       |       |       |       |        |        |       |       |       |       |       |       |            |       |       |       |  |
| Number of neonatal deaths between 1 and 6 days of life (institutional)                    |       |       |       |       |        |        |       |       |       |       |       |       |            |       |       |       |  |



Delivery Register Review - Complications

| <b>Delivery Register</b>                                                          | <b>May-16</b> | <b>Jun-16</b> | <b>Jul-16</b> | <b>Aug-16</b> | <b>Sep-16</b> | <b>Oct-16</b> | <b>Nov-16</b> | <b>Dec-16</b> | <b>Jan 17</b> | <b>Feb 17</b> | <b>Mar 17</b> | <b>Apr 17</b> |
|-----------------------------------------------------------------------------------|---------------|---------------|---------------|---------------|---------------|---------------|---------------|---------------|---------------|---------------|---------------|---------------|
| # of pregnant women admitted to a health facility with pre-eclampsia or eclampsia |               |               |               |               |               |               |               |               |               |               |               |               |
| # of pregnant women admitted to a health facility with pPRoM                      |               |               |               |               |               |               |               |               |               |               |               |               |
| Number of Postpartum Hemorrhage cases                                             |               |               |               |               |               |               |               |               |               |               |               |               |
| Number of neonates with perinatal asphyxia treated with oxygen/resuscitation      |               |               |               |               |               |               |               |               |               |               |               |               |
| Number of neonates with perinatal asphyxia                                        |               |               |               |               |               |               |               |               |               |               |               |               |
| Number of neonates treated for sepsis with antibiotics                            |               |               |               |               |               |               |               |               |               |               |               |               |
| Number of neonates with sepsis                                                    |               |               |               |               |               |               |               |               |               |               |               |               |
| Number of newborns born <2500g and initiated KMC in the facility                  |               |               |               |               |               |               |               |               |               |               |               |               |

Section 19. Medical Record Review - Complications

| Chart Audit for complications                                                                                                    | May-16 | Jun-16 | Jul-16 | Aug-16 | Sep-16 | Oct-16 | Nov-16 | Dec-16 | Jan 17 | Feb 17 | Mar 17 | Apr 17 |
|----------------------------------------------------------------------------------------------------------------------------------|--------|--------|--------|--------|--------|--------|--------|--------|--------|--------|--------|--------|
| # of pregnant women admitted to a health facility with pre-eclampsia or eclampsia who are treated with IV/IM MgSO4, per protocol |        |        |        |        |        |        |        |        |        |        |        |        |
| # of pregnant women admitted to a health facility with pPRoM and treated with erythromycin or ampicillin, per protocol           |        |        |        |        |        |        |        |        |        |        |        |        |
| Number of Postpartum Hemorrhage cases managed per protocol                                                                       |        |        |        |        |        |        |        |        |        |        |        |        |
| - Call for help                                                                                                                  |        |        |        |        |        |        |        |        |        |        |        |        |
| - Initiate resuscitation (crystalloids)                                                                                          |        |        |        |        |        |        |        |        |        |        |        |        |
| - Oxytocin 10IU IM;                                                                                                              |        |        |        |        |        |        |        |        |        |        |        |        |
| - Attempt CCT                                                                                                                    |        |        |        |        |        |        |        |        |        |        |        |        |
| - Stimulate contraction by rubbing the uterus                                                                                    |        |        |        |        |        |        |        |        |        |        |        |        |
| - Follow up: Check and rub the uterus every 15 minute for 2 hours                                                                |        |        |        |        |        |        |        |        |        |        |        |        |
| - Monitor vital signs                                                                                                            |        |        |        |        |        |        |        |        |        |        |        |        |
| - Catheterize and measure urine output                                                                                           |        |        |        |        |        |        |        |        |        |        |        |        |

Section 20. Archived Annual Plan

| Archived Annual Plan                | May-16 | Jun-16 | Jul-16 | Aug-16 | Sep-16 | Oct-16 | Nov-16 | Dec-16 | Jan 17 | Feb 17 | Mar 17 | Apr 17 |
|-------------------------------------|--------|--------|--------|--------|--------|--------|--------|--------|--------|--------|--------|--------|
| Total number of expected deliveries |        |        |        |        |        |        |        |        |        |        |        |        |
| Number of expected pregnancies      |        |        |        |        |        |        |        |        |        |        |        |        |

Section 21. Medical Record Review – Bundle

Month 1: \_\_\_\_\_

(0=Not documented 1=Documented, 3=No space for documenting): use additional sheet to add more medial record review

|                             |                                                                                                         | MRN | MRN | MRN | MRN | MRN | MRN | MRN | MRN | MRN | MRN | MRN | Total |
|-----------------------------|---------------------------------------------------------------------------------------------------------|-----|-----|-----|-----|-----|-----|-----|-----|-----|-----|-----|-------|
| On admission                | Danger sign assessment (BP measurement)                                                                 |     |     |     |     |     |     |     |     |     |     |     |       |
|                             | Partograph started when cervical dilatation at least 4cm                                                |     |     |     |     |     |     |     |     |     |     |     |       |
|                             | <i>Availability of soap, water, alcohol hand rub, and gloves</i>                                        |     |     |     |     |     |     |     |     |     |     |     |       |
|                             | <i>Birth companion encouraged to be present during labour and at birth</i>                              |     |     |     |     |     |     |     |     |     |     |     |       |
|                             | <i>Mothers privacy maintained during labor and delivery</i>                                             |     |     |     |     |     |     |     |     |     |     |     |       |
| Before pushing              | <i>Availability of gloves, soap/savlon and clean water</i>                                              |     |     |     |     |     |     |     |     |     |     |     |       |
|                             | Preparation of 10 IU IV/IM Oxytocin in syringe (measured by oxytocin administration)                    |     |     |     |     |     |     |     |     |     |     |     |       |
|                             | <i>Availability of two clean, dry, warm towels and suction device (all elements)</i>                    |     |     |     |     |     |     |     |     |     |     |     |       |
|                             | <i>Availability of bag and mask (size 0 and 1) both masks)</i>                                          |     |     |     |     |     |     |     |     |     |     |     |       |
|                             | <i>Helper/Assistant identified and informed for resuscitation</i>                                       |     |     |     |     |     |     |     |     |     |     |     |       |
| Soon after birth (with 1hr) | Newborn assessment (does the baby need special care and monitoring) – APGAR score                       |     |     |     |     |     |     |     |     |     |     |     |       |
|                             | Immediate skin to skin and initiate breastfeeding within the 1st hour (measured by mother/baby bonding) |     |     |     |     |     |     |     |     |     |     |     |       |
|                             | Baby weighed and recorded                                                                               |     |     |     |     |     |     |     |     |     |     |     |       |
|                             | Administer Vit K1 to newborn                                                                            |     |     |     |     |     |     |     |     |     |     |     |       |
|                             | Administer Tetracycline Eye Ointment to newborn                                                         |     |     |     |     |     |     |     |     |     |     |     |       |
|                             | <b>Total</b>                                                                                            |     |     |     |     |     |     |     |     |     |     |     |       |

Medical Record Review – Bundle

Month 2: \_\_\_\_\_

(0=Not documented 1=Documented, 3=No space for documenting): use additional sheet to add more medial record review

|                             |                                                                                                         | MRN | MRN | MRN | MRN | MRN | MRN | MRN | MRN | MRN | MRN | MRN | Total |
|-----------------------------|---------------------------------------------------------------------------------------------------------|-----|-----|-----|-----|-----|-----|-----|-----|-----|-----|-----|-------|
| On admission                | Danger sign assessment (BP measurement)                                                                 |     |     |     |     |     |     |     |     |     |     |     |       |
|                             | Partograph started when cervical dilatation at least 4cm                                                |     |     |     |     |     |     |     |     |     |     |     |       |
|                             | <i>Availability of soap, water, alcohol hand rub, and gloves</i>                                        |     |     |     |     |     |     |     |     |     |     |     |       |
|                             | <i>Birth companion encouraged to be present during labour and at birth</i>                              |     |     |     |     |     |     |     |     |     |     |     |       |
|                             | <i>Mothers privacy maintained during labor and delivery</i>                                             |     |     |     |     |     |     |     |     |     |     |     |       |
| Before pushing              | Availability of gloves, soap/savlon and clean water                                                     |     |     |     |     |     |     |     |     |     |     |     |       |
|                             | Preparation of 10 IU IV/IM Oxytocin in syringe (measured by oxytocin administration)                    |     |     |     |     |     |     |     |     |     |     |     |       |
|                             | Availability of two clean, dry, warm towels and suction device (all elements)                           |     |     |     |     |     |     |     |     |     |     |     |       |
|                             | Availability of bag and mask (size 0 and 1) both masks)                                                 |     |     |     |     |     |     |     |     |     |     |     |       |
|                             | Helper/Assistant identified and informed for resuscitation                                              |     |     |     |     |     |     |     |     |     |     |     |       |
| Soon after birth (with 1hr) | Newborn assessment (does the baby need special care and monitoring) – APGAR score                       |     |     |     |     |     |     |     |     |     |     |     |       |
|                             | Immediate skin to skin and initiate breastfeeding within the 1st hour (measured by mother/baby bonding) |     |     |     |     |     |     |     |     |     |     |     |       |
|                             | Baby weighed and recorded                                                                               |     |     |     |     |     |     |     |     |     |     |     |       |
|                             | Administer Vit K1 to newborn                                                                            |     |     |     |     |     |     |     |     |     |     |     |       |
|                             | Administer Tetracycline Eye Ointment to newborn                                                         |     |     |     |     |     |     |     |     |     |     |     |       |
|                             | <b>Total</b>                                                                                            |     |     |     |     |     |     |     |     |     |     |     |       |

Medical Record Review – Bundle

Month 3: \_\_\_\_\_

(0=Not documented 1=Documented, 3=No space for documenting): use additional sheet to add more medial record review

|                             |                                                                                                         | MRN | MRN | MRN | MRN | MRN | MRN | MRN | MRN | MRN | MRN | MRN | Total |
|-----------------------------|---------------------------------------------------------------------------------------------------------|-----|-----|-----|-----|-----|-----|-----|-----|-----|-----|-----|-------|
| On admission                | Danger sign assessment (BP measurement)                                                                 |     |     |     |     |     |     |     |     |     |     |     |       |
|                             | Partograph started when cervical dilatation at least 4cm                                                |     |     |     |     |     |     |     |     |     |     |     |       |
|                             | <i>Availability of soap, water, alcohol hand rub, and gloves</i>                                        |     |     |     |     |     |     |     |     |     |     |     |       |
|                             | <i>Birth companion encouraged to be present during labour and at birth</i>                              |     |     |     |     |     |     |     |     |     |     |     |       |
|                             | <i>Mothers privacy maintained during labor and delivery</i>                                             |     |     |     |     |     |     |     |     |     |     |     |       |
| Before pushing              | <i>Availability of gloves, soap/savlon and clean water</i>                                              |     |     |     |     |     |     |     |     |     |     |     |       |
|                             | Preparation of 10 IU IV/IM Oxytocin in syringe (measured by oxytocin administration)                    |     |     |     |     |     |     |     |     |     |     |     |       |
|                             | <i>Availability of two clean, dry, warm towels and suction device (all elements)</i>                    |     |     |     |     |     |     |     |     |     |     |     |       |
|                             | <i>Availability of bag and mask (size 0 and 1) both masks)</i>                                          |     |     |     |     |     |     |     |     |     |     |     |       |
|                             | <i>Helper/Assistant identified and informed for resuscitation</i>                                       |     |     |     |     |     |     |     |     |     |     |     |       |
| Soon after birth (with 1hr) | Newborn assessment (does the baby need special care and monitoring) – APGAR score                       |     |     |     |     |     |     |     |     |     |     |     |       |
|                             | Immediate skin to skin and initiate breastfeeding within the 1st hour (measured by mother/baby bonding) |     |     |     |     |     |     |     |     |     |     |     |       |
|                             | Baby weighed and recorded                                                                               |     |     |     |     |     |     |     |     |     |     |     |       |
|                             | Administer Vit K1 to newborn                                                                            |     |     |     |     |     |     |     |     |     |     |     |       |
|                             | Administer Tetracycline Eye Ointment to newborn                                                         |     |     |     |     |     |     |     |     |     |     |     |       |
|                             | <b>Total</b>                                                                                            |     |     |     |     |     |     |     |     |     |     |     |       |

Medical Record Review – Bundle

Month 4: \_\_\_\_\_

(0=Not documented 1=Documented, 3=No space for documenting): use additional sheet to add more medial record review

|                             |                                                                                                         | MRN | MRN | MRN | MRN | MRN | MRN | MRN | MRN | MRN | MRN | MRN | Total |
|-----------------------------|---------------------------------------------------------------------------------------------------------|-----|-----|-----|-----|-----|-----|-----|-----|-----|-----|-----|-------|
| On admission                | Danger sign assessment (BP measurement)                                                                 |     |     |     |     |     |     |     |     |     |     |     |       |
|                             | Partograph started when cervical dilatation at least 4cm                                                |     |     |     |     |     |     |     |     |     |     |     |       |
|                             | <i>Availability of soap, water, alcohol hand rub, and gloves</i>                                        |     |     |     |     |     |     |     |     |     |     |     |       |
|                             | <i>Birth companion encouraged to be present during labour and at birth</i>                              |     |     |     |     |     |     |     |     |     |     |     |       |
|                             | <i>Mothers privacy maintained during labor and delivery</i>                                             |     |     |     |     |     |     |     |     |     |     |     |       |
| Before pushing              | <i>Availability of gloves, soap/savlon and clean water</i>                                              |     |     |     |     |     |     |     |     |     |     |     |       |
|                             | Preparation of 10 IU IV/IM Oxytocin in syringe (measured by oxytocin administration)                    |     |     |     |     |     |     |     |     |     |     |     |       |
|                             | <i>Availability of two clean, dry, warm towels and suction device (all elements)</i>                    |     |     |     |     |     |     |     |     |     |     |     |       |
|                             | <i>Availability of bag and mask (size 0 and 1) both masks)</i>                                          |     |     |     |     |     |     |     |     |     |     |     |       |
|                             | <i>Helper/Assistant identified and informed for resuscitation</i>                                       |     |     |     |     |     |     |     |     |     |     |     |       |
| Soon after birth (with 1hr) | Newborn assessment (does the baby need special care and monitoring) – APGAR score                       |     |     |     |     |     |     |     |     |     |     |     |       |
|                             | Immediate skin to skin and initiate breastfeeding within the 1st hour (measured by mother/baby bonding) |     |     |     |     |     |     |     |     |     |     |     |       |
|                             | Baby weighed and recorded                                                                               |     |     |     |     |     |     |     |     |     |     |     |       |
|                             | Administer Vit K1 to newborn                                                                            |     |     |     |     |     |     |     |     |     |     |     |       |
|                             | Administer Tetracycline Eye Ointment to newborn                                                         |     |     |     |     |     |     |     |     |     |     |     |       |
|                             | <b>Total</b>                                                                                            |     |     |     |     |     |     |     |     |     |     |     |       |

Medical Record Review – Bundle

Month 5: \_\_\_\_\_

(0=Not documented 1=Documented, 3=No space for documenting): use additional sheet to add more medial record review

|                             |                                                                                                         | MRN | MRN | MRN | MRN | MRN | MRN | MRN | MRN | MRN | MRN | MRN | Total |
|-----------------------------|---------------------------------------------------------------------------------------------------------|-----|-----|-----|-----|-----|-----|-----|-----|-----|-----|-----|-------|
| On admission                | Danger sign assessment (BP measurement)                                                                 |     |     |     |     |     |     |     |     |     |     |     |       |
|                             | Partograph started when cervical dilatation at least 4cm                                                |     |     |     |     |     |     |     |     |     |     |     |       |
|                             | <i>Availability of soap, water, alcohol hand rub, and gloves</i>                                        |     |     |     |     |     |     |     |     |     |     |     |       |
|                             | <i>Birth companion encouraged to be present during labour and at birth</i>                              |     |     |     |     |     |     |     |     |     |     |     |       |
|                             | <i>Mothers privacy maintained during labor and delivery</i>                                             |     |     |     |     |     |     |     |     |     |     |     |       |
| Before pushing              | <i>Availability of gloves, soap/savlon and clean water</i>                                              |     |     |     |     |     |     |     |     |     |     |     |       |
|                             | Preparation of 10 IU IV/IM Oxytocin in syringe (measured by oxytocin administration)                    |     |     |     |     |     |     |     |     |     |     |     |       |
|                             | <i>Availability of two clean, dry, warm towels and suction device (all elements)</i>                    |     |     |     |     |     |     |     |     |     |     |     |       |
|                             | <i>Availability of bag and mask (size 0 and 1) both masks)</i>                                          |     |     |     |     |     |     |     |     |     |     |     |       |
|                             | <i>Helper/Assistant identified and informed for resuscitation</i>                                       |     |     |     |     |     |     |     |     |     |     |     |       |
| Soon after birth (with 1hr) | Newborn assessment (does the baby need special care and monitoring) – APGAR score                       |     |     |     |     |     |     |     |     |     |     |     |       |
|                             | Immediate skin to skin and initiate breastfeeding within the 1st hour (measured by mother/baby bonding) |     |     |     |     |     |     |     |     |     |     |     |       |
|                             | Baby weighed and recorded                                                                               |     |     |     |     |     |     |     |     |     |     |     |       |
|                             | Administer Vit K1 to newborn                                                                            |     |     |     |     |     |     |     |     |     |     |     |       |
|                             | Administer Tetracycline Eye Ointment to newborn                                                         |     |     |     |     |     |     |     |     |     |     |     |       |
|                             | <b>Total</b>                                                                                            |     |     |     |     |     |     |     |     |     |     |     |       |



Medical Record Review – Bundle

Month 6: \_\_\_\_\_

(0=Not documented 1=Documented, 3=No space for documenting): use additional sheet to add more medial record review

|                             |                                                                                                         | MRN | MRN | MRN | MRN | MRN | MRN | MRN | MRN | MRN | MRN | MRN | Total |
|-----------------------------|---------------------------------------------------------------------------------------------------------|-----|-----|-----|-----|-----|-----|-----|-----|-----|-----|-----|-------|
| On admission                | Danger sign assessment (BP measurement)                                                                 |     |     |     |     |     |     |     |     |     |     |     |       |
|                             | Partograph started when cervical dilatation at least 4cm                                                |     |     |     |     |     |     |     |     |     |     |     |       |
|                             | <i>Availability of soap, water, alcohol hand rub, and gloves</i>                                        |     |     |     |     |     |     |     |     |     |     |     |       |
|                             | <i>Birth companion encouraged to be present during labour and at birth</i>                              |     |     |     |     |     |     |     |     |     |     |     |       |
|                             | <i>Mothers privacy maintained during labor and delivery</i>                                             |     |     |     |     |     |     |     |     |     |     |     |       |
| Before pushing              | <i>Availability of gloves, soap/savlon and clean water</i>                                              |     |     |     |     |     |     |     |     |     |     |     |       |
|                             | Preparation of 10 IU IV/IM Oxytocin in syringe (measured by oxytocin administration)                    |     |     |     |     |     |     |     |     |     |     |     |       |
|                             | <i>Availability of two clean, dry, warm towels and suction device (all elements)</i>                    |     |     |     |     |     |     |     |     |     |     |     |       |
|                             | <i>Availability of bag and mask (size 0 and 1) both masks)</i>                                          |     |     |     |     |     |     |     |     |     |     |     |       |
|                             | <i>Helper/Assistant identified and informed for resuscitation</i>                                       |     |     |     |     |     |     |     |     |     |     |     |       |
| Soon after birth (with 1hr) | Newborn assessment (does the baby need special care and monitoring) – APGAR score                       |     |     |     |     |     |     |     |     |     |     |     |       |
|                             | Immediate skin to skin and initiate breastfeeding within the 1st hour (measured by mother/baby bonding) |     |     |     |     |     |     |     |     |     |     |     |       |
|                             | Baby weighed and recorded                                                                               |     |     |     |     |     |     |     |     |     |     |     |       |
|                             | Administer Vit K1 to newborn                                                                            |     |     |     |     |     |     |     |     |     |     |     |       |
|                             | Administer Tetracycline Eye Ointment to newborn                                                         |     |     |     |     |     |     |     |     |     |     |     |       |
|                             | <b>Total</b>                                                                                            |     |     |     |     |     |     |     |     |     |     |     |       |
