# Supplementary material for: Quality of maternal and newborn health care in Ethiopia: a cross-sectional study
Source: BMC Health Serv Res. 2021 Jul 10;21:679. doi: 10.1186/s12913-021-06680-1 (PMC8272353; doi:10.1186/s12913-021-06680-1)
Supplement: Supplementary file 3 — Additional file 3. [file 12913_2021_6680_MOESM3_ESM.xlsx]

## Sheet: Overall (2)
		Quality Component	Health Facility	Satisfactory (if scored >=75%) Number of Health facilities (%)	Not Satisfactory (if scored >75%) Number of Health facilities (%)	Total
		Input	Health centers	2 (7.4)	25 (92.6)	27
			Hospitals	3 (60)	2 (40)	5
			All facilities	5 (15.6)	27 (84.4)	32
		Process	Health centers	3 (11.1)	24 (88.9)	27
			Hospitals	0 (0)	5 (100)	5
			All facilities	3 (9.4)	29 (90.6)	32
		Output	Health centers	2 (7.7)	24 (92.3)	26
			Hospitals	1 (33.3)	2 (66.7)	3
			All facilities	3 (10.7)	26 (89.7)	29
		All three components	Health centers	No HF is satisfactory in all of the three components.
			Hospitals
			All facilities	2	25	27	7.40741	92.5926
				3	2	5	60	40
				5	27	32	15.625	84.375
				3	24	27	11.1111	88.8889
				0	5	5	0	100
				3	29	32	9.375	90.625
				2	24	26	7.69231	92.3077
				1	2	3	33.3333	66.6667
				3	26	29	10.3448	89.6552

## Sheet: Overall
			Proportion			SD
		Over all care for MNH	Hospitals	Health centers	All facilities	Hospitals	Health centers	All facilities	Average
		Overall Input mean (+SD) for MNH care	79	59	62	10.0534	11.3175	13.2357	11.5355
		Overall Process mean(+SD) for MNH care	58	41	43.4136	15.3329	27.1772	26.2386	22.9162
		Overall Output mean (+SD) for MNH care	62	46	48.0097	24.6509	19.0663	19.8125	21.1766

## Sheet: OutPut
		Output Quality items	Proportion
		•Proportion of women that received antenatal care four or more times during the current pregnancy.	50.5
		•Proportion of pregnant women attending antenatal care clinics tested for syphilis.	44.2
		•Proportion of births attended by skilled health personnel (midwife, nurse, health officer or doctor).	69.6
		•Proportion of births that received post natal care at least once during the early post-partum period (within 48 hrs after delivery).	31.4
		Overall Output Mean Score	48

## Sheet: ComplicationMgt (2)
		Process Quality items	Proportion by cases
		•Proportion of women with pre-eclampsia who are treated with IV/IM MgS04	0.626374
		•Proportion of pregnant women with pPRoM who are not in labor and are given oral erythromycin	0.135135			0.626374	0.135135	0.115385	0.797753	1	0.0421286
		•Proportion of Postpartum Hemorrhage cases managed per protocol	0.115385
		•Proportion of asphyxiated neonates who were resuscitated (with bag & mask) and survived	0.797753
		•Proportion of Sick Young infants treated for sepsis/VSD	1
		•Proportion of low birth weight or premature newborns for whom KMC was initiated after delivery	0.0421286
		Overall complication management Mean Score	0.38

## Sheet: ComplicationMgt
		Process Quality items	Proportion at STATA
		•Proportion of women with pre-eclampsia who are treated with IV/IM MgS04	0.631536
		•Proportion of pregnant women with pPRoM who are not in labor and are given oral erythromycin	0.45
		•Proportion of Postpartum Hemorrhage cases managed per protocol	0.107639
		•Proportion of asphyxiated neonates who were resuscitated (with bag & mask) and survived	0.850758
		•Proportion of Sick Young infants treated for sepsis/VSD	1
		•Proportion of low birth weight or premature newborns for whom KMC was initiated after delivery	0.139815
		Overall complication management Mean Score	0.38

## Sheet: Clinicalbundle&compl'n
		Process Quality items	Proportion
	Clinical care for MNH	•Proportion of deliveries which danger signs assessed on admission (BP measured).	52.8
		•Proportion of deliveries which partograph started when cervical dilatation at least 4cm.	55.1
		•Proportion of mothers who received 10 IU IV/IM Oxytocin.	54.6
		•Proportion of newborn who had assessment (does the baby need special care and monitoring) – APGAR score.	57.5
		•Proportion of deliveries (newborns) who received immediate skin to skin and initiate breastfeeding within the 1st hour (measured by mother/baby bonding).	35
		•Proportion of deliveries (newborns) who received Vit K1.	37.8
		•Proportion of deliveries (newborns) who received Tetracycline Eye Ointment.	46	48.4
		Overall clinical care for MNH.	48.4
	Complication amanagment	•Proportion of women with pre-eclampsia who are treated with IV/IM MgS04	63.2
		•Proportion of pregnant women with pPRoM who are not in labor and are given oral erythromycin	45
		•Proportion of Postpartum Hemorrhage cases managed per protocol	10.8
		•Proportion of asphyxiated neonates who were resuscitated (with bag & mask) and survived	85.1
		•Proportion of Sick Young infants treated for sepsis/VSD	100
		•Proportion of low birth weight or premature newborns for whom KMC was initiated after delivery	14	53.0167
		Overall complication management Mean Score	38

## Sheet: Cases
Total |
pre-eclamps |											P/E	PROM	PPH	cases for |
ia/eclampsi |													0	12 months |				Total PPH |
a cases for |							0 | 17 56.67 56.67				0	0	4	from sep |				cases for |
12 months |							1 | 3 10.00 66.67				3	6	2	2015 to Aug |				12 months |
from sep |							2 | 4 13.33 80.00				8	6	6	2016 & May |				from sep |
2015 to Aug |							3 | 1 3.33 83.33				3	6	7	16 to apr |				2015 to Aug |
2016 & Ma | Freq. Percent Cum.							4 | 1 3.33 86.67				4	19	8	2017 fo | Freq. Percent Cum.				2016 & May |
------------+-----------------------------------							5 | 1 3.33 90.00				5		9	------------+-----------------------------------				16 to apr |
0 | 17 56.67 56.67							8 | 1 3.33 93.33				8		12	0 | 19 63.33 63.33				2017 for | Freq. Percent Cum.
1 | 3 10.00 66.67							9 | 1 3.33 96.67				9		26	1 | 6 20.00 83.33				------------+-----------------------------------
2 | 4 13.33 80.00							51 | 1 3.33 100.00				51		30	2 | 3 10.00 93.33				0 | 17 56.67 56.67
3 | 1 3.33 83.33							------------+-----------------------------------			Total	91	37	104	6 | 1 3.33 96.67				1 | 4 13.33 70.00
4 | 1 3.33 86.67														19 | 1 3.33 100.00				2 | 1 3.33 73.33
5 | 1 3.33 90.00														------------+-----------------------------------				3 | 2 6.67 80.00
8 | 1 3.33 93.33														Total | 30 100.00				7 | 1 3.33 83.33
9 | 1 3.33 96.67																		8 | 1 3.33 86.67
51 | 1 3.33 100.00																		9 | 1 3.33 90.00
------------+-----------------------------------																		12 | 1 3.33 93.33
Total | 30 100.00																		26 | 1 3.33 96.67
																		30 | 1 3.33 100.00
																		------------+-----------------------------------
																		Total | 30 100.00
Total |
Asphyxia |
cases for |
12 months |									Asphyxia	Sepsis	LBW
from sep |											1			Total LBW |
2015 to Aug |									0	0	6			and |
2016 & May |									4		6			pre-maturit |
16 to apr |									4		4			y for 12 |
201 | Freq. Percent Cum.				Total |					3		5			months from |
------------+-----------------------------------				Sepsis |					5		6			sep 2015 to |
0 | 18 60.00 60.00				treatement |					22		11			Aug 2016 & |
1 | 4 13.33 73.33				for 12 |					15		12			May 16 to a | Freq. Percent Cum.
2 | 2 6.67 80.00				months from |					36		19			------------+-----------------------------------
3 | 1 3.33 83.33				sep 2015 to |				Total	89	20	24			0 | 15 48.39 48.39
5 | 1 3.33 86.67				Aug 2016 & |							46			1 | 1 3.23 51.61
11 | 2 6.67 93.33				May 16 to |							307			2 | 3 9.68 61.29
15 | 1 3.33 96.67				apr | Freq. Percent Cum.							906			3 | 2 6.45 67.74
36 | 1 3.33 100.00				------------+-----------------------------------							1353			4 | 1 3.23 70.97
------------+-----------------------------------				0 | 25 83.33 83.33										5 | 1 3.23 74.19
Total | 30 100.00				1 | 2 6.67 90.00										6 | 1 3.23 77.42
				5 | 1 3.33 93.33										11 | 1 3.23 80.65
				13 | 2 6.67 100.00										12 | 1 3.23 83.87
				------------+-----------------------------------										19 | 1 3.23 87.10
				Total | 30 100.00										24 | 1 3.23 90.32
														46 | 1 3.23 93.55
														307 | 1 3.23 96.77
														906 | 1 3.23 100.00
														------------+-----------------------------------
														Total | 31 100.00

## Sheet: ComplicationScore
PreEclampsiaMgt	PROMmgt	PPHmgt	AsphyxiaMgt	SepsisMgt	KMC	Total		CompnScore	ClinicalService7
						0	0		0.571429	0.571429
						0	0		0.380952	0.380952
						0	0		0.704762	0.704762
						0	0		0.597619	0.597619
						0	0		0.935714	0.935714
						0	0		0	0
1	1	0.625	1	1	0.565217	5.19022	6	0.865036	0.740476	0.802756
0.5			0		0.583333	1.08333	3	0.361111	0.483333	0.422222
					0.333333	0.333333	1	0.333333	0	0.166667
1			0.5	1	0	2.5	4	0.625	0.688095	0.656548
						0	0		0	0
1	1		1.09091	1	0.2	4.29091	5	0.858182	0.907143	0.882662
						0	0		0.657143	0.657143
						0	0		0.416667	0.416667
					0	0	1	0	0.538095	0.269048
						0	0		0	0
		0		1		1	2	0.5	0.247619	0.37381
						0	0		0	0
0		0				0	2	0	0.507143	0.253571
1	0	0.333333	1			2.33333	4	0.583333	0.716667	0.65
0.333333	0		1		0	1.33333	4	0.333333	0.309524	0.321429
0	0.5	0	0.818182		0.181818	1.5	5	0.3	0	0.15
	0	0			0	0	3	0	0.704762	0.352381
	0	0				0	2	0	0.559524	0.279762
0			1			1	2	0.5	0.0809524	0.290476
1		0	1		0	2	4	0.5	0.688095	0.594048
		0			0	0	2	0	0.561905	0.280952
1	1	0	0.8		0.125	2.925	5	0.585	0.866667	0.725833
	0	0			0	0	3	0	0.709524	0.354762
			1		0.105263	1.10526	2	0.552632	0.87381	0.713221
0.745098	1	0.333333	1		0.0032573	3.08169	5	0.616338	0.530952	0.573645
						0	0		0.514286	0.514286
0.631536	0.45	0.107639	0.850758	1	0.139815	0.927388	6	0.375665	0.484152	0.434136
PreEclampsiaMgt	PROMmgt	PPHmgt	AsphyxiaMgt	SepsisMgt	KMC
12	10	12	12	4	15	# of HF who had cases
91	37	104	89	20	1353	Cases
57	5	12	71	20	57	Treated
0.626374	0.135135	0.115385	0.797753	1	0.0421286			0.452796

## Sheet: Treated
Total |
Asphyxia |							PreEclampsiaMgt	PROMmgt	PPHmgt	AsphyxiaMgt	SepsisMgt	KMC
treatement |							57	5	12	71	20	57	57					Total PPH |
for 12 |							5	5	3	4			3					managment |
months from |							2		4	2			6					for 12 |
sep 2015 to |							4		5	3		Total |	3					months from |
Aug 2016 & |							8	Total KMC |		5		pre-eclamps |	5					sep 2015 to |
May 16 to |							38	for 12 |		9		ia/eclampsi |	14					Aug 2016 & |
ap | Freq. Percent Cum.								months from |		12		a managment |	26					May 16 to |
------------+-----------------------------------								sep 2015 to |		36		for 12 |						apr 2017 | Freq. Percent Cum.
0 | 19 63.33 63.33								Aug 2016 & |				months from |						------------+-----------------------------------
1 | 4 13.33 76.67								May 16 to |				sep 2015 to |						0 | 26 89.66 89.66
2 | 1 3.33 80.00								apr 2017 |				Aug 2016 | Freq. Percent Cum.				Total PPROM |		3 | 1 3.45 93.10
3 | 1 3.33 83.33								for Foger | Freq. Percent Cum.				------------+-----------------------------------				managment |		4 | 1 3.45 96.55
5 | 1 3.33 86.67								------------+-----------------------------------				0 | 20 68.97 68.97				for 12 |		5 | 1 3.45 100.00
9 | 1 3.33 90.00								0 | 20 66.67 66.67				1 | 5 17.24 86.21				months from |		------------+-----------------------------------
12 | 2 6.67 96.67								1 | 3 10.00 76.67				2 | 1 3.45 89.66				sep 2015 to |		Total | 29 100.00
36 | 1 3.33 100.00								2 | 2 6.67 83.33				4 | 1 3.45 93.10				Aug 2016 & |
------------+-----------------------------------								3 | 1 3.33 86.67				8 | 1 3.45 96.55				May 16 to |
Total | 30 100.00								5 | 1 3.33 90.00				38 | 1 3.45 100.00				apr 20 | Freq. Percent Cum.
								7 | 2 6.67 96.67				------------+-----------------------------------				------------+-----------------------------------
								26 | 1 3.33 100.00				Total | 29 100.00				0 | 24 82.76 82.76
			Total |					------------+-----------------------------------								1 | 5 17.24 100.00
			Sepsis |					Total | 30 100.00								------------+-----------------------------------
			cases for |													Total | 29 100.00
			12 months |
			from sep |
			2015 to Aug |
			2016 & May |
			16 to apr |
			2017 | Freq. Percent Cum.
			------------+-----------------------------------
			0 | 26 86.67 86.67
			1 | 2 6.67 93.33
			5 | 1 3.33 96.67
			13 | 1 3.33 100.00
			------------+-----------------------------------
			Total | 30 100.00
