# Supplementary material for: Quality of maternal and newborn health care in Ethiopia: a cross-sectional study
Source: BMC Health Serv Res. 2021 Jul 10;21:679. doi: 10.1186/s12913-021-06680-1 (PMC8272353; doi:10.1186/s12913-021-06680-1)
Supplement: Supplementary file 4 — Additional file 4. [file 12913_2021_6680_MOESM4_ESM.xlsx]

## Sheet: Data in excel
Region	Woreda	FacilityName	TypeofFacility	ExpectedPregnancies2008EC	ExpectedPregnancies2009EC	Facilityhasfunctionalincinerat	Facilityhasfunctionalplacenta	Doesthefacilityhaveelectricp	DexamethasonebethamethasoneIVa	Methyldopa1stlineavailable	Hydralazineavailable	Nifedipineavailable	AmpicillinIVavailable	GentamycinIVavailable	MetronidazoleIVavailable	TTCeyeointmentavailable	VitaminKavailable	MgSO4available	Calciumgluconateavailable	Oxytocinavailable	anc4proportion	SBAproportion	SyphilisProportion	PNC48hrsProportion	StillBirth	PreEclampsiaMgt	PROMmgt	PPHmgt	AsphyxiaMgt	SepsisMgt	KMC	DangerSignBPproportion	PartographIntiationProportion	OxytocinProportion	APGARproportion	skinToSkinProportion	VitKproportion	TTCproportion	WaterAvailability	NormalsalineRL	OxygenConcentratorOxygenCylinder	NewbornCorner	AmbulanceWellEquiped	WeighingScalesNewborn	CompleteDeliverySet	TowelDryingWrapping	BulbpigeonsuctionN	Facemasksneonatal0	Facemasksneonatal1
SNNPR	Deguna Fango	Dimtu HC	1	946	979	1	1	1	0	0	1	0	1	1	1	1	1	1	1	1	0.579875	0.889004	1	0	0							1	1	0.416667	0.966667	0.116667	0.25	0.25	0	1	1	1	1	1	1	0	1	1	1
Amhara	Fogera	Guramba Health Center	1	1053	1079	1	1	1	0	1	1	1	1	1	0	1	1	1	0	1	0.438662	0.465613	0	0.111524	1.98413		0	0				0.5	0.566667	0.366667	0.433333	0.283333	0.216667	0.3	0	1	0	1	0	1	1	0	1	0	1
Amhara	Fogera	Alember Health Center	1	1235	1266	1	1	1	0	1	1	1	1	1	1	1	1	1	1	1	0.0758294	0.323065	0.908938	0.0023697	12.3153	0	0.5	0	0.818182		0.181818	0.766667	0.783333	0.75	0.766667	0.633333	0.733333	0.5	1	1	0	1	0	1	1	0	1	1	1
Tigray	Tanqua Abergele	Agbe	1	555	567	1	1	1	0	0	0	0	1	1	1	1	1	1	0	1	0.339921	0.922925	0.353293	0.0118577	8.60215	0.5			0		0.583333	0.366667	0.4	0.716667	0.7	0.683333	0.633333	0.683333	1	1	0	0	0	1	1	0	1	0	1
SNNPR	Deguna Fango	Eddo HC	1	655	671	1	1	1	1	0	1	1	0	1	1	1	1	1	0	1	0.646526	0.891239	0.429885	0.0181269	0							1	1	0.966667	0.983333	0.683333	0.933333	0.983333	0	1	0	1	1	1	0	0	1	0	0
Oromia	Limu Bilbilu	Sirbo	1	968	993	1	1	1	0	1	1	1	1	1	0	1	1	0	0	1	0.330943	0.879098	0.0118343	0.879098	2.33645						0	0	0	0	0	0	0	0	0	1	0	0	0	1	1	0	1	0	0
Amhara	Fogera	Addis Betchrstian Health Center	1	916	939	0	1	1	1	1	1	0	1	1	1	1	1	1	1	1	0.131974	0.197425	0.738657	0.0633047	16.4835	0.333333	0		1		0	0.833333	0.833333	0.95	0.833333	0.516667	0.5	0.716667	1	1	0	0	0	1	1	0	1	0	0
Amhara	Fogera	Kidest Hana Health Center	1	1019	1044	1	1	1	0	1	1	1	1	1	0	1	1	1	0	1	0.322115	0.290385	0.728511	0.0634615	21.0526	0			1			0.416667	0.583333	0.533333	0.5	0.4	0.366667	0.583333	1	1	0	0	0	1	1	0	1	1	1
Oromia	Limu Bilbilu	Koji	1	1267	1300	1	1	1	1	1	1	1	1	1	0	1	1	0	0	1	1.06975	1.08542	0	1.08542	0							0	0	0	0	0	0	0	0	1	0	0	0	1	1	0	0	0	0
Amhara	Fogera	Quhar Health Center	1	1198	1228	1	1	1	0	1	1	1	1	1	1	1	1	1	0	1	0.143443	0.49918	0.603613	0.0401639	20.0669	1	1	0	0.8		0.125	0.883333	0.933333	0.9	0.866667	0.4	0.316667	0.516667	1	1	0	0	0	1	1	0	1	1	1
Oromia	Limu Bilbilu	Robe Garjeda	1	427		1	0	1	1	0	1	0	0	1	0	1	1	0	0	1	0.949309	0.942396	0.0126582	0.949309	0							0	0	0	0	0	0	0	0	1	0	0	0	1	0	0	0	0	0
SNNPR	Deguna Fango	Dendu Denguna HC	1	557	571	1	1	1	0	0	1	0	1	0	1	1	1	0	0	1	1.00719	1.06475	0.316053	0.0431655	0							0.933333	0.933333	0.916667	0.966667	0.866667	0.866667	0.866667	0	1	1	0	1	1	1	1	1	1	0
Tigray	Tanqua Abergele	Ruwakeze	1	516	528	1	1	1	0	1	0	0	1	1	1	1	1	1	0	1	0.295367	0.312741	0.325648	0.050193	6.17284						0.333333	0.583333	0.55	0.683333	0.766667	0.6	0.633333	0.783333	1	1	0	1	0	1	1	0	1	1	0
Amhara	Fogera	Meneguzer Health Center	1	1295	1323	0	1	1	0	1	1	1	0	1	1	1	1	0	1	1	0.235562	0.222644	0.776291	0.110942	20.9059			0			0	0.5	0.583333	0.583333	0.566667	0.2	0.216667	0.266667	1	1	0	0	0	1	1	0	1	0	0
Amhara	Fogera	Woji Health Center	1	864	886	0	1	1	0	1	1	1	1	1	1	1	0	0	0	1	0.209276	0.236425	0	0.0769231	19.4175		0	0			0	0.716667	0.716667	0.716667	0.7	0.416667	0.0666667	0.433333	1	1	0	1	0	1	1	1	0	0	0
Oromia	Limu Bilbilu	Samera	1	1219	35104	1	0	1	0	1	1	1	0	1	0	1	1	1	0	1	0.768781	1.01169	0.277916	1.01002	0.830565							0	0	0	0	0	0	0	0	1	0	0	0	0	1	0	0	0	0
Oromia	Limu Bilbilu	Bekoji	1	882	900	1	1	1	0	1	1	1	1	1	0	1	1	1	0	1	1.0618	0.48764	0.292247	0.48764	0			0		1		0.133333	0.1	0.283333	0.3	0.316667	0.266667	0.333333	1	1	0	0	0	1	1	0	1	0	0
Oromia	Limu Bilbilu	Lemu	1			1	1	1	1	1	0	1	1	1	0	1	1	0	0	1	0.215026	0.860104	0.0100334	0.860104	0	0		0				0	0	0	0	0	0	0	1	1	0	0	0	1	1	0	0	0	0
Amhara	Fogera	Woreta HC	1	1361	1337	1	1	1	1	1	1	1	1	1	1	1	1	1	1	1	0.657186	0.851796	1	0	0.887312				1		0.105263	0.666667	0.666667	0.483333	0.783333	0.1	0.416667	0.433333	1	1	0	0	0	1	1	0	1	0	1
SNNPR	Deguna Fango	Ankarob HC	1	439	450	1	1	1	1	0	0	0	1	1	0	1	1	1	0	1	0.688341	0.748879	0.277193	0.29148	0							0.983333	0.983333	0.883333	0.883333	0.35	0.0666667	0.866667	1	1	1	0	1	1	1	0	0	0	0
Amhara	Fogera	Diba Health Center	1	499	511	1	1	1	1	1	1	1	0	1	0	1	0	1	0	1	0.173152	0.256809	0.336207	0.0252918	0		0	0			0	0.233333	0.25	0.366667	0.35	0.3	0.333333	0.333333	1	1	0	0	0	1	1	0	1	1	1
Oromia	Limu Bilbilu	Merero	1	1514	1553	1	1	1	1	1	1	1	1	1	1	1	1	0	1	1	0.780053	0.783355	0.479518	0.782695	3.39271							0	0	0	0	0	0	0	0	1	0	0	0	1	1	0	1	0	0
SNNPR	Deguna Fango	Kercheche HC	1	416	427	1	1	1	0	0	0	0	1	1	0	0	0	0	0	1	0.729858	1.01896	0.271137	0.28436	0							0.95	0.95	0.9	0.633333	0.0166667	0.633333	0.85	0	1	1	0	1	1	1	0	1	0	0
Tigray	Tanqua Abergele	Siye	1	600	620	1	1	1	0	1	0	0	1	1	1	1	1	1	0	1	0.206642	0.402214	0	0.0442804	14.0187	1	1		1.09091	1	0.2	0.55	0.566667	0.583333	0.583333	0.533333	0.55	0.55	1	1	1	0	0	1	1	1	1	0	1
Tigray	Tanqua Abergele	Gera	1	561	574	0	1	1	0	1	0	0	1	1	0	1	1	1	0	1												0.0833333	0.0833333	0.1	0.0833333	0.0833333	0.0166667	0.116667	1	1	0	0	0	1	0	0	0	1	1
Tigray	Tanqua Abergele	Jijike	1	672	696	0	1	0	0	0	0	0	1	1	0	1	1	1	0	1	0.357828	0.779553	0.868824	0	8.19672	1			0.5	1	0	0.583333	0.716667	0.55	0.766667	0.633333	0.783333	0.783333	1	1	0	1	0	1	1	0	1	0	0
Amhara	Fogera	Kinty Health Center	1	380	390	0	1	0	0	1	1	1	1	0	1	1	1	1	0	1	0.609137	0.728426	0.242308	0.482233	10.5634	1		0	1		0	0.7	0.733333	0.7	0.7	0.333333	0.233333	0.533333	1	1	0	1	0	1	1	0	0	0	0
SNNPR	Deguna Fango	Bitena Primary Hospital	2	1109	1136	1	1	1	1	0	1	1	0	1	1	0	0	1	0	0	0.509025	0.890794	1	0.16787	3.30761							1	1	0.95	0.933333	0.416667	0.883333	0.883333	0	1	1	1	1	1	1	0	1	1	1
Amhara	Fogera	Debire Tabor Hospita	2			1	1	1	1	1	1	1	1	1	0	1	1	1	1	1			0.941781		44.1366	0.745098	1	0.333333	1		0.0032573	0.633333	0.9	0.8	0.883333	0.483333	0.65	0.616667	1	1	1	1	0	1	1	0	1	1	1
Tigray	Tanqua Abergele	Yechila Primary hospital	2	1000	911	1	1	1	1	1	1	1	1	1	1	1	1	1	1	1	0.373479	0.973236	0.0920354	0.0340633	17.6768	1	1	0.625	1	1	0.565217	0.7	0.683333	0.95	0.983333	0.95	0.916667	0.933333	1	1	1	0	0	1	1	1	1	1	1
Amhara	Fogera	FelegeHiwot Hospital	2			1	1	1	0	1	1	1	1	1	1	1	1	1	1	1			0.989772		52.7279							0.383333	0.366667	0.683333	0.633333	0.433333	0.616667	0.6	1	1	1	0	0	1	1	0	1	1	1
Oromia	Limu Bilbilu	Bokoji Hospital	2		8210	1	1	1	1	1	1	1	1	1	1	1	1	1	1	1	0.734043	1.17408	0.41074	1.12186	14.9875	1	0	0.333333	1			0.783333	0.75	0.766667	0.833333	0.45	0	0.0166667	1	1	1	0	0	1	1	0	0	0	0
[truncated: 19 more columns]

## Sheet: Sheet2
Region
Woreda
FacilityName
TypeofFacility
ExpectedPregnancies2008EC
ExpectedPregnancies2009EC
Facilityhasfunctionalincinerat
Facilityhasfunctionalplacenta
Doesthefacilityhaveelectricp
DexamethasonebethamethasoneIVa
Methyldopa1stlineavailable
Hydralazineavailable
Nifedipineavailable
AmpicillinIVavailable
GentamycinIVavailable
MetronidazoleIVavailable
TTCeyeointmentavailable
VitaminKavailable
MgSO4available
Calciumgluconateavailable
Oxytocinavailable
anc4proportion
SBAproportion
SyphilisProportion
PNC48hrsProportion
StillBirth
PreEclampsiaMgt
PROMmgt
PPHmgt
AsphyxiaMgt
SepsisMgt
KMC
DangerSignBPproportion
PartographIntiationProportion
OxytocinProportion
APGARproportion
skinToSkinProportion
VitKproportion
TTCproportion
WaterAvailability
NormalsalineRL
OxygenConcentratorOxygenCylinder
NewbornCorner
AmbulanceWellEquiped
WeighingScalesNewborn
CompleteDeliverySet
TowelDryingWrapping
BulbpigeonsuctionN
Facemasksneonatal0
Facemasksneonatal1
RadiantwarmerN
RunningWaterN
SoapN
InfrustScore
EquipSupplyScore
DrugsScore
OverAllInputs
ClinicalService
OverAllProcesScore
ClinicalService7
compnscore
OutPutScore
OverAllInputCat
OverAllProcessCat
OverAllOutputCat
AllOutputProcessInput
InfrastructureAll
DrugAll
EquipmentsSupplyAll
