# Supplementary material for: Quality of maternal and newborn health care in Ethiopia: a cross-sectional study
Source: BMC Health Serv Res. 2021 Jul 10;21:679. doi: 10.1186/s12913-021-06680-1 (PMC8272353; doi:10.1186/s12913-021-06680-1)
Supplement: Supplementary file 5 — Additional file 5. [file 12913_2021_6680_MOESM5_ESM.xlsx]

## Sheet: Data base
Region	Woreda	PHCU	Facility Name	Type of Facility	List health facilities (health post, health center) in your catchment	Total Population2008 E.C	Expected Pregnancies 2008 E.C	Total Population 2009 E.C	Expected Pregnancies 2009 E.C	Specialist doctors	General practitioners	IESO	Anesthetists	Health officers	Nurses	Midwives	Health extension workers	Laboratory personnel	Pharmacy personnel	Data personnel	Cleaners	Other supportive staff	Total	Total trained on CEmONC	CEmONC trained and working at L&D or MNCH	Total trained on BEmONC	BEmONC trained and working at L&D or MNCH	Total trained on IMNCI	IMNCI trained and working at L&D or MNCH	Total trained on PMTCT	PMTCT trained and working at L&D or MNCH	Total trained HBB	HBB trained and working at L&D or MNCH	Total trained on Comprehensive Post Abortion Care (CPAC)	Comprehensive Post Abortion Care (CPAC)trained and working at L&D or MNCH	Total trained on Long Acting Family Planning(LAFP)	Long Acting Family Planning(LAFP) trained and working at L&D or MNCH	Total trained on Comprehensive Family Planning(CFP)	Comprehensive Family Planning(CFP)trained and working at L&D or MNCH	Total trained on Essential New Born Care (ENBC)	Essential New Born Care (ENBC)trained and working at L&D or MNCH	Total trained on NICU	NICU trained and working at L&D or MNCH	Total trained on Non-pneumatic Anti-shock Garment (NASG)	Non-pneumatic Anti-shock Garment (NASG)trained and working at L&D or MNCH	Total trained on Quality Improvement/Quality Assurance Training	Quality Improvement/Quality Assurance trained and working at L&D or MNCH	Total trained on Data Quality	Data Quality trained and working at L&D or MNCH
SNNPR	Deguna Fango	Bitena PHCU	Bitena Primary Hospital	2	7	32049	1109	32821	1136	0	4	3	2	5	12	6	19	5	3	1	12	42	111	0	0	3	3	1	1	1	1	0	0	1	1	2	2	3	3	2	2	3	3	0	0	0	0	1	1
SNNPR	Deguna Fango	Bitena PHCU	Deguna Wanza HP	0	0	6146	213	6294	218								3
SNNPR	Deguna Fango	Bitena PHCU	Fango Kindo A HP	0	0	1517	52	1729	59								1
SNNPR	Deguna Fango	Bitena PHCU	Fango Kindo B HP	0	0	1516	52	1728	59								2
SNNPR	Deguna Fango	Bitena PHCU	Deguna Damot Shinka HP	0	0	6792	235	6956	241								2
SNNPR	Deguna Fango	Bitena PHCU	Deguna Koisha Humbo HP	0	0	4625	160	4736	164								3
SNNPR	Deguna Fango	Bitena PHCU	Deguna Ofa Kalach HP	0	0	4807	166	4923	170								2
SNNPR	Deguna Fango	Bitena PHCU	Fango Humbo HP	0	0	3812	132	3904	135								4
SNNPR	Deguna Fango	Dimtu PHCU	Dimtu HC	1	10	27624	946	28290	979	0	0	0	0	3	16	2	23	3	2	1	2	16	45	0	0	0	0	3	3	1	1	0	0	0	0	1	1	0	0	0	0	0	0	0	0	0	0	0	0
SNNPR	Deguna Fango	Dimtu PHCU	Fango Sore A HP	0	0	3634	126	3722	129								2
SNNPR	Deguna Fango	Dimtu PHCU	Fango Bolaso A HP	0	0	3575	124	3661	141								2
SNNPR	Deguna Fango	Dimtu PHCU	Fango Damot A HP	0	0	3577	125	3663	127								4
SNNPR	Deguna Fango	Dimtu PHCU	Fango Bolaso B HP	0	0												2
SNNPR	Deguna Fango	Dimtu PHCU	Fango Sore B HP	0	0												2
SNNPR	Deguna Fango	Dimtu PHCU	Fango Damot B HP	0	0												2
SNNPR	Deguna Fango	Dimtu PHCU	Fango Koysha HP	0	0	4564	158	5203	180								3
SNNPR	Deguna Fango	Dimtu PHCU	Fango Ofa HP	0	0	4362	152	4995	173								3
SNNPR	Deguna Fango	Dimtu PHCU	Bilate Eta HP	0	0	2618	91	2985	103								2
SNNPR	Deguna Fango	Dimtu PHCU	Bilate Charicho HP	0	0	3584	124	4086	141								2
SNNPR	Deguna Fango	Eddo PHCU	Eddo HC	1	5	18924	655	19380	671	0	0	0	0	2	11	2	8	2	1	1	2	16	37	0	0	3	3	3	3	1	1	0	0	0	0	0	0	3	3	1	1	0	0	0	0	0	0	0	0
SNNPR	Deguna Fango	Eddo PHCU	Edo Sore HP	0	0	3703	128	3792	131								2
SNNPR	Deguna Fango	Eddo PHCU	Edo Kindo HP	0	0	4093	142	4192	145								2
SNNPR	Deguna Fango	Eddo PHCU	Arusi Woyde HP	0	0	2823	98	2894	100								2
SNNPR	Deguna Fango	Eddo PHCU	Edo Boloso HP	0	0	2477	86	2537	88								1
SNNPR	Deguna Fango	Eddo PHCU	Edo Bashile HP	0	0	3730	129	3817	132								1
SNNPR	Deguna Fango	Dendo Deguna PHCU	Dendu Denguna HC	1	4	16107	557	16495	571	0	0	0	0	1	9	1	8	2	2	1	2	10	28	0	0	0	0	2	2	0	0	0	0	0	0	4	4	0	0	2	2	0	0	0	0	0	0	1	1
SNNPR	Deguna Fango	Dendo Deguna PHCU	Dendo Koishambo A HP	0	0	3566	123	3652	126								2
SNNPR	Deguna Fango	Dendo Deguna PHCU	Dendo Workish HP	0	0	5414	187	5544	192								2
SNNPR	Deguna Fango	Dendo Deguna PHCU	Dendo Koishambo B HP	0	0	1459	51	1489	52								2
SNNPR	Deguna Fango	Dendo Deguna PHCU	Dendo Ofa HP	0	0	3332	115	3412	118								2
SNNPR	Deguna Fango	Kercheche PHCU	Kercheche HC	1	3	12038	416	12328	427	0	0	0	0	2	6	1	5	2	2	1	2	17	33	0	0	0	0	3	3	0	0	0	0	0	0	0	0	1	1	1	1	0	0	0	0	0	0	1	1
SNNPR	Deguna Fango	Kercheche PHCU	Deguna Kindo HP	0	0	2789	96	2855	98								1
SNNPR	Deguna Fango	Kercheche PHCU	Deguna Bolosso HP	0	0	4362	151	4468	155								2
SNNPR	Deguna Fango	Kercheche PHCU	Deguna Sore HP	0	0	2587	90	2649	92								2
SNNPR	Deguna Fango	Ankarob PHCU	Ankarob HC	1	3	12696	439	13002	450	0	0	0	0	2	8	2	7	2	2	1	2	14	33	0	0	1	1	3	3	1	1	0	0	0	0	0	0	3	3	0	0	0	0	0	0	0	0	0	0
SNNPR	Deguna Fango	Ankarob PHCU	Anka Diguna	0	0	4280	148	4384	152								2
SNNPR	Deguna Fango	Ankarob PHCU	Anka Damote	0	0	2525	87	2586	89								2
SNNPR	Deguna Fango	Ankarob PHCU	Fango Biso	0	0	3738	129	3828	132								2
Tigray	Tanqua Abergele		Yechila Primary hospital	2	9	29228	1000	26488	911	0	0	2	1	6	19	8	7	2	2	1	9	19	76	2	2	8	8	1	1	7	7	0	0	1	1	4	3	2	2	0	0	0	0	2	2	4	1	1	0
Tigray	Tanqua Abergele		Hadnet	0	0	1781.59	61.7042	1819	63								1
Tigray	Tanqua Abergele		Lemlem	0	0	4966.7	170.421	5071	174								2
Tigray	Tanqua Abergele		Negede Berhan	0	0	4857.98	167.483	4960	171								2
Tigray	Tanqua Abergele		Embarfael	0	0	5818.81	199.804	5941	204								2
Tigray	Tanqua Abergele		Mearey	0	0	8518.12	292.85	8697	299								2
Tigray	Tanqua Abergele		Agbe	1	3	16331	555	16678	567	0	0	0	0	3	8	3	6	1	0	1	3	12	37	0	0	3	3	3	3	4	3	0	0	2	0	5	3	5	5	2	2	0	0	1	1	3	1	0	0
Tigray	Tanqua Abergele		Agbe	0	0	7419	252	7575	258								2
Tigray	Tanqua Abergele		Hadish Tekle	0	0	4776	162	4876	166								2
Tigray	Tanqua Abergele		Sheha Tekle	0	0	4136	141	4223	144								2
Tigray	Tanqua Abergele		Ruwakeze	1	3	16601	516	16955	528	0	0	0	0	2	6	2	4	1	2	1	3	24	45	0	0	2	2	2	2	1	1	0	0	1	1	1	1	1	1	0	0	0	0	0	0	2	1	0	0
Tigray	Tanqua Abergele		Lemate	0	0	5448	180	5563	191								2						2
Tigray	Tanqua Abergele		Selam	0	0	4770	162	4872	167								1						1
Tigray	Tanqua Abergele		Adiwoyane	0	0	6384	204	6520	224								1						1
Tigray	Tanqua Abergele		Jijike	1	3	20001	672	20421	696	0	0	0	0	2	9	4	7	1	1	1	3	7	35	0	0	3	3	2	1	3	3	0	0	1	1	2	2	2	2	0	0	0	0	1	1	2	2	0	0
Tigray	Tanqua Abergele		Yakir	0	0	2889	98	2830	96								2						2
Tigray	Tanqua Abergele		Simret	0	0	10495	357	1279	350								3						3
Tigray	Tanqua Abergele		Busha	0	0	7037	239	6892	234								2						2
Tigray	Tanqua Abergele		Gera	1	3	16330	561	16678	574	0	0	0	0	1	5	2	5	0	1	1	2	5	22	0	0	2	2	2	2	1	1	0	0	1	1	2	2	0	0	0	0	0	0	2	1	2	1	0	0
Tigray	Tanqua Abergele		Tseykeme	0	0	6290	216	6424	221								2						2
Tigray	Tanqua Abergele		Gera	0	0	6551	225	6692	239								1						1
Tigray	Tanqua Abergele		Gruweri	0	0	3489	120	3562	123								2						2
Tigray	Tanqua Abergele		Siye	1	3	17640	600	18015	620	0	0	0	0	1	7	2	6	1	1	1	3	4	26	0	0	2	2	1	1	1	1	0	0	1	1	2	2	2	2	0	0	0	0	2	2	2	1	0	0
Tigray	Tanqua Abergele		Teklewoini	0	0	5169	178	5279	182								2						2
Tigray	Tanqua Abergele		Felege hiwot	0	0	5146	177	5256	181								2						2
Tigray	Tanqua Abergele		Siye	0	0	7325	249	7480	257								2						2
Oromia	Limu Bilbilu		Samera	1	4	1187	1219	34219	35104	0	0	0	0	2	4	2		1	1	1	1	3	15	0	0	2	2	1	0	1	1	0	0	0	0	0	0	1	1	0	0	6	6	0	0	1	0	0	0
Oromia	Limu Bilbilu		Gimbite	0	0	2097	73	2151	68								2
Oromia	Limu Bilbilu		Waltai	0	0	1001	347	10260	322								3
Oromia	Limu Bilbilu		Lagena Kula	0	0	11069	384	11555	356								3
Oromia	Limu Bilbilu		Gadisa Darara	0	0	8080	280	8289	260								2
Oromia	Limu Bilbilu		Samera PHCU	3
Oromia	Limu Bilbilu		Merero	1	7	43631	1514	44757	1553	0	0	0	0	2	5	3		2	2	0	3	5	21	0	0	3	3	1	0	1	1	0	0	0	0	1	1	0	0	1	1	6	6	0	0	1	0	0	0
Oromia	Limu Bilbilu		Koma Hangara	0	0	7783	270	7984									2
Oromia	Limu Bilbilu		Koma Katara	0	0	7015	244	7207									2
Oromia	Limu Bilbilu		Koma kara	0	0	6106	212	6263									2
Oromia	Limu Bilbilu		Ulule kara	0	0	7531	261	7725									2
Oromia	Limu Bilbilu		Ulule Hasa	0	0	4330	150	4442									2
Oromia	Limu Bilbilu		Farachu	0	0	6469	224	6636									2
Oromia	Limu Bilbilu		Merero PHCU	3
Oromia	Limu Bilbilu		Sirbo	1	4	27885	968	28604	993	0	0	0	0	2	6	3		1	1	0	1	5	20	0	0	4	3	1	1	3	3	0	0	0	0	3	2	3	3	2	2	6	6	0	0	4	0	0	0
Oromia	Limu Bilbilu		Sirbo Badiya	0	0	8404	292	8621									2
Oromia	Limu Bilbilu		Inkolo Garjeda	0	0	8478	297	8697									2
Oromia	Limu Bilbilu		Gese Bilbilu	0	0	8564	294	8785									2
Oromia	Limu Bilbilu		Sirbo Tawn	0	0			2502									2
Oromia	Limu Bilbilu		Sirbo PHCU	3
Oromia	Limu Bilbilu		Koji	1	4	36515	1267	37457	1300	0	0	0	0	1	6	3		1	1	0	1	4	17	0	0	3	3	1	0	0	0	0	0	1	1	3	3	3	3	0	0	6	6	0	0	1	0	4	0
Oromia	Limu Bilbilu		Koji kaka	0	0	9551	332	9829									2
Oromia	Limu Bilbilu		Komo walkite	0	0	7654	266	7851									2
Oromia	Limu Bilbilu		Koji chafa	0	0	9538	331	9784									2
Oromia	Limu Bilbilu		Koji katara	0	0	8307	288	8521									2
Oromia	Limu Bilbilu		Koji PHCU	3
Oromia	Limu Bilbilu		Bekoji	1	1		882	25951	900	0	0	0	0	2	7	3		2	2	1	2	11	30	0	0	3	3	1	0	2	2	0	0	4	1	4	2	4	2	2	0	6	6	0	0	1	0	0	0
Oromia	Limu Bilbilu		Bokoji Health post	0	0	11396		12976									10
Oromia	Limu Bilbilu		Bekoji PHCU	3
Oromia	Limu Bilbilu		Robe Garjeda	1	1	12306	427			0	0	0	0	1	5	3		1	0	0	1	3	14	0	0	3	3	1	0	1	0	0	0	1	0	2	2	0	0	0	0	6	6	0	0	1	0	0	0
Oromia	Limu Bilbilu		Waltai Naga	0	0	7864	273	8067									2
Oromia	Limu Bilbilu		Robe Garjeda PHCU	3
Oromia	Limu Bilbilu		Lemu	1	3	22210		22783		0	0	0	0	1	8	3		2	2	1	1	5	23	0	0	3	3	2	0	0	0	0	0	1	1	2	2	2	2	0	0	6	6	0	0	3	0	0	0
Oromia	Limu Bilbilu		Lemmu Dima	0	0	5805	201	5955	207								2
Oromia	Limu Bilbilu		Lemmu Mickael	0	0	6339	220	6503									2
Oromia	Limu Bilbilu		Lemmu Burkitu	0	0	7415	257	5606									2
Oromia	Limu Bilbilu		Lemu PHCU	3
Oromia	Limu Bilbilu		Bokoji Hospital	2	7			236589	8210	0	8	4	2	0	43	10		7	8	2	21	54	138	4	4	10	10	4	1	0	4	0	0	0	2	2	1	1	1	0	0	0	0	0	0	3	0	1	0
Amhara	Fogera	Addis Betchrstian PHCU	Addis Betchrstian Health Center	1	5	27195	916	27871	939	0	0	0	0	2	7	3	10	3	1	1	2	9	28	0	0	2	2	2	2	2	2	1	1	0	0	1	1	2	2	1	1	0	0	2	2	3	3	0	0
Amhara	Fogera	Addis Betchrstian PHCU	Asika Health Post	0	0	4959	167	5082	171								2
Amhara	Fogera	Addis Betchrstian PHCU	Gubida Health Post	0	0	4528	153	4641	156								1
Amhara	Fogera	Addis Betchrstian PHCU	Rib Gebreal Health Post	0	0	8221	277	8425	284								3
Amhara	Fogera	Addis Betchrstian PHCU	Rib Kidanemhiret Health Post	0	0	4959	167	5082	171								2
Amhara	Fogera	Addis Betchrstian PHCU	Wotemb Health Post	0	0	4528	153	4641	156								2
Amhara	Fogera	Alember PHCU	Alember Health Center	1	6	36447	1235	37557	1266	0	0	0	0	2	9	3	12	3	2	3	2	8	32	0	0	3	3	0	0	3	3	2	2	1	1	2	2	0	0	0	0	0	0	4	4	2	2	7	3
Amhara	Fogera	Alember PHCU	Alember Health Post	0	0	5630	190	5770	194								1
Amhara	Fogera	Alember PHCU	Alember zuria Health Post	0	0	7933	267	8130	274								2
Amhara	Fogera	Alember PHCU	Mintura Health Post	0	0	4151	140	4254	143								2
Amhara	Fogera	Alember PHCU	Zabro Health Post	0	0	5000	169	5125	173								1
Amhara	Fogera	Alember PHCU	Zeng Health Post	0	0	5000	169	5125	173								2
Amhara	Fogera	Alember PHCU	Chalma Health Post	0	0	8931	301	9153	308								4
Amhara	Fogera	Diba PHCU	Diba Health Center	1	3	14808	499	15175	511	0	0	0	0	1	7	1	6	1	1	1	2	7	21	0	0	1	1	1	1	2	2	0	0	0	0	0	0	0	0	1	1	0	0	3	3	2	2	7	2
Amhara	Fogera	Diba PHCU	Diba Health Post	0	0	4586	155	4699	158								2
Amhara	Fogera	Diba PHCU	Kokit Health Post	0	0	5637	190	5777	195								2
Amhara	Fogera	Diba PHCU	Sifatra Health Post	0	0	4586	155	4699	158								2
Amhara	Fogera	Guramba PHCU	Guramba Health Center	1	7	31252	1053	32028	1079	0	0	0	0	2	8	4	17	0	1	1	2	9	27	0	0	4	4	1	1	2	2	0	0	0	0	2	2	2	2	0	0	0	0	1	1	2	2	0	0
Amhara	Fogera	Guramba PHCU	Arida Health Post	0	0	4082	138	4183	141								3
Amhara	Fogera	Guramba PHCU	Dena Health Post	0	0	5110	172	5277	176								2
Amhara	Fogera	Guramba PHCU	Dilmo Health Post	0	0	4705	159	4822	162								3
Amhara	Fogera	Guramba PHCU	Fuafuat Health Post	0	0	4082	138	4183	141								2
Amhara	Fogera	Guramba PHCU	Gajjen Health Post	0	0	4082	138	4183	141								2
Amhara	Fogera	Guramba PHCU	Gatrmeda Health Post	0	0	4082	138	4183	141								2
Amhara	Fogera	Guramba PHCU	Guramba Health Post	0	0	5110	172	5277	176								3
Amhara	Fogera	Kidest Hana PHCU	Kidest Hana Health Center	1	5	30228	1019	30979	1044	0	0	0	0	1	6	3	11	0	2	1	2	6	21	0	0	0	0	1	1	1	1	0	0	0	0	1	1	0	0	0	0	0	0	4	4	3	3	0	0
Amhara	Fogera	Kidest Hana PHCU	Chirstos-semira Health Post	0	0	5199	175	5328	180								2
Amhara	Fogera	Kidest Hana PHCU	Kidest Hana Health Post	0	0	7961	268	8159	275								2
Amhara	Fogera	Kidest Hana PHCU	Nabega Health Post	0	0	5934	200	6082	205								2
Amhara	Fogera	Kidest Hana PHCU	Tigrie Mender Health Post	0	0	5934	200	6082	205								2
Amhara	Fogera	Kidest Hana PHCU	Wagetera Health Post	0	0	5199	175	5328	180								3
Amhara	Fogera	Kinty PHCU	Kinty Health Center	1	3	11299	380	11580	390	0	0	0	0	1	6	3	7	1	1	1	2	8	23	0	0	2	2	0	0	1	1	0	0	0	0	0	0	0	0	0	0	0	0	0	0	1	1	5	5
Amhara	Fogera	Kinty PHCU	Debre qusquam Health Post	0	0	5650	190	5790	195								3
Amhara	Fogera	Kinty PHCU	Kinty Health Post	0	0	5650	190	5790	195								2
Amhara	Fogera	Kinty PHCU	Merewa Health post	0													2
Amhara	Fogera	Meneguzer PHCU	Meneguzer Health Center	1	6	38301	1295	39253	1323	0	0	0	0	1	8	3	12	1	2	1	2	8	26	0	0	0	0	1	1	1	1	0	0	0	0	2	2	0	0	0	0	0	0	0	0	2	2	1	1
Amhara	Fogera	Meneguzer PHCU	Abagunda Health Post	0	0	4027	136	4125	139								2
Amhara	Fogera	Meneguzer PHCU	Abakiros Health Post	0	0	7037	237	7212	243								2
Amhara	Fogera	Meneguzer PHCU	Agereselam Health Post	0	0	8552	288	8765	295								2
Amhara	Fogera	Meneguzer PHCU	Bebekes Health Post	0	0	7791	263	7985	269								2
Amhara	Fogera	Meneguzer PHCU	Meneguzer Health Post	0	0	6866	231	7036	237								2
Amhara	Fogera	Meneguzer PHCU	Sendega Health Post	0	0	4027	136	4125	139								2
Amhara	Fogera	Quhar PHCU	Quhar Health Center	1	7	35554	1198	36437	1228	0	0	0	0	2	6	3	10	1	1	1	3	11	28	0	0	1	1	1	1	2	2	0	0	0	0	0	0	1	1	1	1	0	0	0	0	2	2	4	4
Amhara	Fogera	Quhar PHCU	Anguko Health Post	0	0	5543	187	5681	191								1
Amhara	Fogera	Quhar PHCU	Quhar Abo Health Post	0	0	4198	141	4302	145								1
Amhara	Fogera	Quhar PHCU	Quhar-Michael Health Post	0	0	7208	243	7387	249								1
Amhara	Fogera	Quhar PHCU	ShagaGebreal Health Post	0	0	4004	135	4103	138								1
Amhara	Fogera	Quhar PHCU	Shaga-mariam Health Post	0	0	4002	135	4102	138								3
Amhara	Fogera	Quhar PHCU	Shina-Girbshi Health Post	0	0	5300	179	5432	183								2
Amhara	Fogera	Quhar PHCU	Shina-Teklehaymanot Health Post	0	0	5299	179	5431	183								1
Amhara	Fogera	Woji PHCU	Woji Health Center	1	4	25642	864	26278	886	0	0	0	0	2	7	2	8	1	1	1	2	9	25	0	0	2	2	2	2	2	2	0	0	0	0	1	1	0	0	0	0	0	0	3	3	2	2	7	2
Amhara	Fogera	Woji PHCU	Tihua Zakana Health Post	0	0	7432	250	7616	257								2
Amhara	Fogera	Woji PHCU	Woji Arbamba Health Post	0	0	5261	177	5392	182								2
Amhara	Fogera	Woji PHCU	Woji Health Post	0	0	3055	103	3130	105								2
Amhara	Fogera	Woji PHCU	Woreta Zuria	0	0	7689	259	7880	266								2
Amhara	Fogera	Woji PHCU	Makisegn ketema	0		2205	74	2260	76
Amhara	Woreta town	Woreta PHCU	Woreta HC	1	4	40386	1361	39684	1337	0	0	0	0	3	17	3	8	4	5	2	5	18	57	0	0	3	3	3	3	3	3	0	0	4	4	7	7	7	7	3	3	0	0	4	4	2	2	7	4
Amhara	Woreta town	Woreta PHCU	Woreta Kebele 1 HP	0	0			12430
Amhara	Woreta town	Woreta PHCU	Woreta Kebele 2 HP	0	0			10458
Amhara	Woreta town	Woreta PHCU	Woreta Kebele 3 HP	0	0			8486
Amhara	Woreta town	Woreta PHCU	Woreta Kebele 4 HP	0	0			8306
Amhara	Fogera	Debire Tabor Hospital	Debire Tabor Hospita	2	9	2442603		2485528		8	16	5	6	2	141	17		22	23	6	7	99	378	8	8	4	4	2	2	2	2	6	6	8	8	8	8	8	8	0	0	6	6	4	4	5	5	0	0
Amhara	Fogera	FelegeHiwot Hospital	FelegeHiwot Hospital	2	9			6m		8	24	0	12	10	276	30		55	46	7	0	163	740	2	2	6	6	0	0	5	5	1	1	6	6	7	7	6	6	0	0	2	2	1	1	11	11	12	4
[truncated: 779 more columns]

## Sheet: Data dictionary 
	Category	Variable Name	Question	Field Type	Code	Comments
	General information	Region	Region	Text
		Woreda	Woreda	Text
		HF name	Name of Facility	Text
		HF type	Type of Facility	Text	0=health post,1=health center,2=hospital
		No of C_HFs	List health facilities (health post, health center) in your catchment	Text		Write the number of facilities in the catchment not their list
		TP2008	Total Population2008 E.C	Number
		EP2008	Expected Pregnancies 2008 E.C	Number
		TP 2009	Total Population 2009 E.C	Number
		EP 2009	Expected Pregnancies 2009 E.C	Number
		s_inf	Surviving infant	Number
	Staffing	Spdocs	Specialist doctors	Number
		GPs	General practitioners	Number
		IESO	IESO	Number
		Anest	Anesthetists	Number
		HOs	Health officers	Number
		Nurs	Nurses	Number
		Mwives	Midwives	Number
		HEWs	Health extension workers	Number
		LabP	Laboratory personnel	Number
		PharmP	Pharmacy personnel	Number
		DatP	Data personnel	Number
		Clnrs	Cleaners	Number
		Othrss	Other supportive staff	Number
		Tstaff	Total	Number
	Training	CEmTT	Total trained on CEmONC	Number
		CEmMN	CEmONC trained and working at L&D or MNCH	Number
		BEmTT	Total trained on BEmONC	Number
		BEmMN	BEmONC trained and working at L&D or MNCH	Number
		IMNTT	Total trained on IMNCI	Number
		IMNMN	IMNCI trained and working at L&D or MNCH	Number
		PMTT	Total trained on PMTCT	Number
		PMTMN	PMTCT trained and working at L&D or MNCH	Number
		HBBTT	Total trained HBB	Number
		HBBMN	HBB trained and working at L&D or MNCH	Number
		CPACTT	Total trained on Comprehensive Post Abortion Care (CPAC)	Number
		CPACMN	Comprehensive Post Abortion Care (CPAC)trained and working at L&D or MNCH	Number
		LAFPTT	Total trained on Long Acting Family Planning(LAFP)	Number
		LAFPMN	Long Acting Family Planning(LAFP) trained and working at L&D or MNCH	Number
		CFPTT	Total trained on Comprehensive Family Planning(CFP)	Number
		CFPMN	Comprehensive Family Planning(CFP)trained and working at L&D or MNCH	Number
		ENBCTT	Total trained on Essential New Born Care (ENBC)	Number
		ENBCMN	Essential New Born Care (ENBC)trained and working at L&D or MNCH	Number
		NICUTT	Total trained on NICU	Number
		NICUMN	NICU trained and working at L&D or MNCH	Number
		NASGTT	Total trained on Non-pneumatic Anti-shock Garment (NASG)	Number
		NASGTT	Non-pneumatic Anti-shock Garment (NASG)trained and working at L&D or MNCH	Number
		QI/QATT	Total trained on Quality Improvement/Quality Assurance Training	Number
		QI/QAMN	Quality Improvement/Quality Assurance trained and working at L&D or MNCH	Number
		DQTT	Total trained on Data Quality	Number
		DQMN	Data Quality trained and working at L&D or MNCH	Number
	Patient Feedback Mechanism	PSS_6m	Has your facility had a patient satisfaction survey completed in the last 6 months?	Text	0=No,1=Yes
		us_sbox	Do you use suggestion box?	Text	0=No,1=Yes
		rv_sbox	If Yes, how often do you review it?	Text		Use text not numbers to make it uniform(Eg. Every two weeks)
		omgf	Do you have other means of getting feedback from clients, family & community?	Text	0=No,1=Yes
		desc	If yes, describe.	Text
		prc_f	Is there a Patients’ Rights Charter for the facility?	Text	0=No,1=Yes
		vp_prc	Visibly placed to guide staff & patients?	Text	0=No,1=Yes
	Death & near-miss audits	mdsr_a	Maternal death surveillance and response	Text	0=No,1=Yes
		nd_a	Neonatal death audits?	Text	0=No,1=Yes
		pd_a	Perinatal death audits?	Text	0=No,1=Yes
		nm_a	Near-miss audits?	Text	0=No,1=Yes
	Referral Process	cn_rc	Functional contact numbers for referral centers	Text	0=No,1=Yes
		fe_a	Functional, Well-equipped Ambulance	Text	0=No,1=Yes
		am_pt	If no, alternative means of patient transport?	Text	0=No,1=Yes
		rfp	Liaison officer / referral focal person	Text	0=No,1=Yes
	QI structure and initiatives	qi_i1	Has there been any QI initiative in this facility in the past 1 year?	Text	0=No,1=Yes
		qi_ili	If yes, provide brief detail or list of the initiatives in comment section.	Text		List the initiatives
		qi_t	Is there a QI team in the facility?	Text	0=No,1=Yes
		qi_ild	If Yes, please list the designations of the team members – use comment section	Text		List the designated once
		f_tm	How frequently does the team meet?	Text		Use text not numbers to make it uniform(Eg. Every month)
		eo_sqi	Is there an external organization or unit supporting the QI work in your facility?	Text	0=No,1=Yes
		n_eosqi	If Yes, provide name(s) in comment section	Text		List the names of external organizations
	Supportive supervision	ss_mnh	Is there regular supportive supervision from HC to HP (hospital to HC) for MNH program?	Text	0=No,1=Yes
		f_ss	If yes, how frequent it is?	Text		Use text not numbers to make it uniform(Eg. Every month)
		umnh-pc	If yes, have you used MNH program checklist?	Text	0=No,1=Yes
		f_g	If yes, were feedbacks given?	Text	0=No,1=Yes
	Review meetings	n_rm	How many monthly PHCU review meetings were conducted at Hospital/PHCU level in 2008EFY?	Text	0=No,1=Yes
		d_mnh	Was MNH program discussed?	Text	0=No,1=Yes
		p_hew	Were the HEWs participated?	Text	0=No,1=Yes	Only for HCs
		p_staff	Were the health center(Hospital) staff participated?	Text	0=No,1=Yes
		t_m	Were the minutes taken?	Text	0=No,1=Yes
		d_a	Was an action plan developed following the performance review?	Text	0=No,1=Yes
	Data quality	dq_cs	Is there data quality checking system?	Text	0=No,1=Yes
		fdq_c	If yes, how frequent?	Text		Use text not numbers to make it uniform(Eg. Every month)
	Partners working in the Facility	n_o	Name of Organization(Partners working in the Facility)	Text
		n_p	Area/Project	Text
	Infrastructure and Environment	lco_oc	Level of cleanliness and organization of overall compound	Number	1= Not organized; Wastes are seen every where, 2= (between 1 and 3), 3= Moderately organized; average cleanliness, 4= (between 3 and 5), 5= Highly organized with labelling & proper arrangement; Neat, shiny, attractive 6=NA
		lco_anc	Level of cleanliness and organization of MCH OPD (ANC)	Number
		lco_mw	Level of cleanliness and organization of Wards (maternity ward)	Number
		lco_dr	Level of cleanliness and organization of Labour/delivery room	Number
		lco_th	Level of cleanliness and organization of Operation Theatre	Number
		lco_P	Level of cleanliness and organization of Pharmacy	Number
		lco_L	Level of cleanliness and organization of Laboratory	Number
		lco_to	Level of cleanliness and organization of Toilets	Number
		f_fi	Facility has functional incinerator	Text	0=No,1=Yes
		f_fpp	Facility has functional placenta pit	Text	0=No,1=Yes
		f_eps	Does the facility have electric power supply	Text	0=No,1=Yes
		sf_eps	What is the source of power supply	Text	0=powergrid/line,1=generator,2=solar,3=other
		fb_eps	Is there also back-up power supply	Text	0=No,1=Yes
		h_ps	how many hours is the power supply running?	Number
		s_w	What is the source of water?	Text	0=pipewater,1=handpump,2=well,3=spring,4=river,5=other
		b_wr	Is there a back water reservoir (tanker) within the facility?	Text	0=No,1=Yes
	ANC	anc_ec	Examination couch	Number
		anc_ws	Weighing scales (Adult)	Number
		anc_bpa	Blood pressure apparatus	Number
		anc_wt	Stethoscope	Number
		anc_th	Thermometer	Number
		anc_f	Fetoscope / Doppler	Number
		anc_cl	Clean Linen for examination coach	Number
		anc_hmb	Height measurement board	Number
		anc_fmt	Fundal height measurement tape	Number
		anc_gc	Gestation calendar/gestational wheel	Number
		anc_um	Ultrasound machine	Number
		anc_htk	HIV test kit	Number
		pmg_a	PMTCT guidelines available	Text	0=No,1=Yes
		pmg_u	PMTCT guidelines utilized	Text	0=No,1=Yes
		fcp_a	Focused ANC poster available	Text	0=No,1=Yes
		fap_u	Focused ANC poster utilized	Text	0=No,1=Yes
		ipcp_a	Infection prevention and control protocol available	Text	0=No,1=Yes
		ipcp_u	Infection prevention and control protocol utilized	Text	0=No,1=Yes
		w_ipp	Is there written infection prevention protocol?	Text	0=No,1=Yes
		rw	Running water	Text	0=No,1=Yes
		sp	Soap	Text	0=No,1=Yes
		pt_d	Personal towel for drying	Text	0=No,1=Yes
		a_hr	Alcohol hand rub	Text	0=No,1=Yes
		i_a	Iron Available	Text	0=No,1=Yes
		i_so3	Iron Stock out in past 3 months	Text	0=No,1=Yes
		fa_a	Folic acid Available	Text	0=No,1=Yes
		fa_so3	Folic acid Stock out in past 3 months	Text	0=No,1=Yes
		am_a	Antimalarials Available	Text	0=No,1=Yes
		am_so3	Antimalarials Stock out in past 3 months	Text	0=No,1=Yes
		ttv_a	TT vaccine Available	Text	0=No,1=Yes
		ttv_so3	TT vaccine Stock out in past 3 months	Text	0=No,1=Yes
		arv_a	Antiretroviral drugs Available	Text	0=No,1=Yes
		arv_so3	Antiretroviral drugs Stock out in past 3 months	Text	0=No,1=Yes
		nvp_a	Nevirapine syrup Available	Text	0=No,1=Yes
		nvp_so3	Nevirapine syrup Stock out in past 3 months	Text	0=No,1=Yes
		mb_a	Mebendazole Available	Text	0=No,1=Yes
		mb_so3	Mebendazole Stock out in past 3 months	Text	0=No,1=Yes
	Delivery	ds_kmc	Is there a designated space for KMC?	Text	0=No,1=Yes
		nc	Is there Newborn corner in the delivery room?	Text	0=No,1=Yes
		NICU	Is there NICU in the facility?	Text	0=No,1=Yes
		amb	Is there an ambulance which serves the facility?	Text	0=No,1=Yes
		i_desc	If yes, describe functionality, fuel and adequacy&alternative mechanisms	Text
		d_ws	Weighing scales (New born with 50gm precision)	Number
		d_ab	Admission bed	Number
		d_rb	Recovery Beds	Number
		dc	Delivery couch	Number
		dl	Delivery light	Number
		ncds	Number of complete delivery sets (Kidney dish, forceps, gauze swabs, Scissors, pads, cord tie/clips)	Number
		t_dw	Towel for drying and wrapping	Number
		bh	Baby hat	Number
		nvs	Number of Vaginal Speculums	Number
		ntrs	Number of Tear/episiotomy repair sets (Swabs, Cotton, episiotomy scissors, needle holders, drape-toothed/non-toothed forceps)	Number
		ps	Bulb/pigeon suction	Number
		sm	Suction machine	Number
		af_a	Ambu bag & face masks (adult)	Number
		af_n0	Ambu bag & face masks (neonatal- size 0)	Number
		af_n1	Ambu bag & face masks (neonatal- size 1)	Number
		htr	Heater	Number
		rw	Radiant warmer	Number
		inc	Incubator	Number
		pl	Phototherapy light/unit	Number
		nc	Nasal catheter	Number
		ngt	Nasogastric tubes size 5-8	Number
		uc	Urethral catheter	Number
		ocr	Oxygen concentrator	Number
		oc	Oxygen cylinder	Number
		ww	Respiratory rate timer (Wall watch)	Number
		td	Tongue depressors (describe type)	Number
		oa	Guedel (oropharyngeal) airway	Number
		cnl	Cannulae (different sizes)	Number
		sb_kmc	Support Binder for KMC(KMC wrap)	Number
		f_c	Feeding cups	Number
		b_p	Breast pump	Number
		bs_ts	Blood sugar testing sticks	Number
		bs_b	Blood specimen bottles	Number
		us_b	Urine specimen bottles	Number
		htk	HIV test kit	Number
		w_ipp	Is there written infection prevention protocol?	Text	0=No,1=Yes
		rw	Running water	Text	0=No,1=Yes
		sp	Soap	Text	0=No,1=Yes
		pt_d	Personal towel for drying	Text	0=No,1=Yes
		a_hr	Alcohol hand rub	Text	0=No,1=Yes
		egl	Eye google	Text	0=No,1=Yes
		apr	Apron	Text	0=No,1=Yes
		bts	Boots	Text	0=No,1=Yes
		fmask	Face mask	Text	0=No,1=Yes
		cp	Cape	Text	0=No,1=Yes
		elg	Elbow length glove (sterile )	Text	0=No,1=Yes
		tbs	Do they use triple buckle system?	Text	0=No,1=Yes
		b_swg	Use three buckets for solid waste segregation (Red, Yellow, Black)	Text	0=No,1=Yes
		sb_sm	Safety box for sharp materials	Text	0=No,1=Yes
		atclv	Autoclave	Text	0=No,1=Yes
		s_drum	Sterilization drums	Text	0=No,1=Yes
		hd_g	Heavy duty gloves for cleaners	Text	0=No,1=Yes
		bln	Bin liners (plastic liner)	Text	0=No,1=Yes
		aspt	Antiseptics	Text	0=No,1=Yes
		bb_ce	Brooms, Brushes etc for cleaning equipment	Text	0=No,1=Yes
		sb_td	Sufficient bed linens and theatre drapes	Text	0=No,1=Yes
		d_sa	Demarcated sterilization area for washing & decontamination, packing of instruments and autoclaving.	Text	0=No,1=Yes
		mp_a	Management Protocol on Selected Obstetrics Topics for Health Centers, 2010 available	Text	0=No,1=Yes
		mp_u	Management Protocol on Selected Obstetrics Topics for Health Centers, 2010 utilized	Text	0=No,1=Yes
		msp_a	MgSO4 administration protocol available	Text	0=No,1=Yes
		msp_u	MgSO4 administration protocol utilized	Text	0=No,1=Yes
		bctm_a	BEmONC/CEmONC training manual available	Text	0=No,1=Yes
		bctm_u	BEmONC/CEmONC training manual utilized	Text	0=No,1=Yes
		pga_a	Technical and procedural guidelines for safe abortion services in Ethiopia, 2014 available	Text	0=No,1=Yes
		pga_u	Technical and procedural guidelines for safe abortion services in Ethiopia, 2014 utilized	Text	0=No,1=Yes
		enbc_a	Essential newborn care guideline available	Text	0=No,1=Yes
		enbc_u	Essential newborn care guideline utilized	Text	0=No,1=Yes
		imn_a	Integrate management of newborn and child Illness available	Text	0=No,1=Yes
		imn_u	Integrate management of newborn and child Illness utilized	Text	0=No,1=Yes
		hbbp_a	Newborn resuscitation flow chart (HBB poster) available	Text	0=No,1=Yes
		hbbp_u	Newborn resuscitation flow chart (HBB poster) utilized	Text	0=No,1=Yes
		ncg_a	Newborn corner guideline available	Text	0=No,1=Yes
		ncg_u	Newborn corner guideline utilized	Text	0=No,1=Yes
		amp_a	AMTSL poster available	Text	0=No,1=Yes
		amp_u	AMTSL poster utilized	Text	0=No,1=Yes
		ncp_a	National newborn case management protocol available	Text	0=No,1=Yes
		ncp_u	National newborn case management protocol utilized	Text	0=No,1=Yes
		icug_a	Neonatal intensive care unit guide available	Text	0=No,1=Yes
		icug_u	Neonatal intensive care unit guide utilized	Text	0=No,1=Yes
		ipcp_a	Infection prevention and control protocol available	Text	0=No,1=Yes
		ipcp_u	Infection prevention and control protocol utilized	Text	0=No,1=Yes
	Operation theatre	t_oc	Oxygen concentrator/Oxygen cylinder	Number
		t_po	Pulse oxymeters	Number
		t_ir	Infant resuscitation table	Number
		t_sm	Suction machine (state Manual or Electric)	Number
		t_aba	Ambu bag & face masks (adult)	Number
		t_abn0	Ambu bag & face masks neonatal size(0)	Number
		t_abn1	Ambu bag & face mask size(1)()	Number
		t_aOt	Adjustable Operating table	Number
		t_ol	Operating light (UPS back-up?)	Number
		t_olc	If operating light available, what condition?	Number
		t_csn	Number of C-section sets	Number
		t_lsn	Number of Laparatomy sets	Number
		t_hsn	Number of hysterectomy sets	Number
		t_esn	Number of evacuation sets	Number
		t_ac	Air-conditioner	Number
	Pharmacy	dex_a	Dexamethasone/bethamethasone IV available	Text	0=No,1=Yes
		dex_so3	Dexamethasone/bethamethasone IV Stock out in past 3 months	Text	0=No,1=Yes
		hydi_a	Hydrocortisone IV available	Text	0=No,1=Yes
		hydi_so3	Hydrocortisone IV Stock out in past 3 months	Text	0=No,1=Yes
		anap_a	Analgesics PO available	Text	0=No,1=Yes
		anap_so3	Analgesics PO Stock out in past 3 months	Text	0=No,1=Yes
		anai_a	Analgesics IM available	Text	0=No,1=Yes
		anai_so3	Analgesics IM Stock out in past 3 months	Text	0=No,1=Yes
		40%_a	40% glucose available	Text	0=No,1=Yes
		40%_so3	40% glucose Stock out in past 3 months	Text	0=No,1=Yes
		metl_a	Methyldopa- 1st line available	Text	0=No,1=Yes
		metl_so3	Methyldopa- 1st line Stock out in past 3 months	Text	0=No,1=Yes
		lab_a	Labetalol available	Text	0=No,1=Yes
		lab_so3	Labetalol Stock out in past 3 months	Text	0=No,1=Yes
		hyd_a	Hydralazine available	Text	0=No,1=Yes
		hyd_so3	Hydralazine Stock out in past 3 months	Text	0=No,1=Yes
		nif_a	Nifedipine available	Text	0=No,1=Yes
		nif_so3	Nifedipine Stock out in past 3 months	Text	0=No,1=Yes
		ant_a	Antidiabetic for GDM (Insulin) available	Text	0=No,1=Yes
		ant_so3	Antidiabetic for GDM (Insulin) Stock out in past 3 months	Text	0=No,1=Yes
		mic_a	Miconazole Vaginal pessary available	Text	0=No,1=Yes
		mic_so3	Miconazole Vaginal pessary Stock out in past 3 months	Text	0=No,1=Yes
		neo_a	Neomycin + Polymixin B + Nystatin Tablet (vaginal) available	Text	0=No,1=Yes
		neo_so3	Neomycin + Polymixin B + Nystatin Tablet (vaginal) Stock out in past 3 months	Text	0=No,1=Yes
		amp_a	Ampicillin (IV) available	Text	0=No,1=Yes
		amp_so3	Ampicillin (IV) Stock out in past 3 months	Text	0=No,1=Yes
		amo_a	Amoxicillin (PO) available	Text	0=No,1=Yes
		amo_so3	Amoxicillin (PO) Stock out in past 3 months	Text	0=No,1=Yes
		ery_a	Erythromycin (PO) available	Text	0=No,1=Yes
		ery_so3	Erythromycin (PO) Stock out in past 3 months	Text	0=No,1=Yes
		gen_a	Gentamycin (IV) available	Text	0=No,1=Yes
		gen_so3	Gentamycin (IV) Stock out in past 3 months	Text	0=No,1=Yes
		met_a	Metronidazole (IV) available	Text	0=No,1=Yes
		met_so3	Metronidazole (IV) Stock out in past 3 months	Text	0=No,1=Yes
		pen_a	Pen G available	Text	0=No,1=Yes
		pen_so3	Pen G Stock out in past 3 months	Text	0=No,1=Yes
		cef_a	Ceftriaxone available	Text	0=No,1=Yes
		cef_so3	Ceftriaxone Stock out in past 3 months	Text	0=No,1=Yes
		ttc_a	TTC eye ointment available	Text	0=No,1=Yes
		ttc_so3	TTC eye ointment Stock out in past 3 months	Text	0=No,1=Yes
		vit_a	Vitamin K available	Text	0=No,1=Yes
		vit_so3	Vitamin K Stock out in past 3 months	Text	0=No,1=Yes
		mgs_a	MgSO4 available	Text	0=No,1=Yes
		mgs_so3	MgSO4 Stock out in past 3 months	Text	0=No,1=Yes
		dia_a	Diazepam available	Text	0=No,1=Yes
		dia_so3	Diazepam Stock out in past 3 months	Text	0=No,1=Yes
		cal_a	Calcium gluconate available	Text	0=No,1=Yes
		cal_so3	Calcium gluconate Stock out in past 3 months	Text	0=No,1=Yes
		oxy_a	Oxytocin available	Text	0=No,1=Yes
		oxy_so3	Oxytocin Stock out in past 3 months	Text	0=No,1=Yes
		erg_a	Ergometrine available	Text	0=No,1=Yes
		erg_so3	Ergometrine Stock out in past 3 months	Text	0=No,1=Yes
		mis_a	Misoprostol available	Text	0=No,1=Yes
		mis_so3	Misoprostol Stock out in past 3 months	Text	0=No,1=Yes
		pet_a	Pethidine available	Text	0=No,1=Yes
		pet_so3	Pethidine Stock out in past 3 months	Text	0=No,1=Yes
		nal_a	Naloxone available	Text	0=No,1=Yes
		nal_so3	Naloxone Stock out in past 3 months	Text	0=No,1=Yes
		adr_a	Adrenaline available	Text	0=No,1=Yes
		adr_so3	Adrenaline Stock out in past 3 months	Text	0=No,1=Yes
		ami_a	Aminophylline available	Text	0=No,1=Yes
		ami_so3	Aminophylline Stock out in past 3 months	Text	0=No,1=Yes
		sal_a	Salbutamol available	Text	0=No,1=Yes
		sal_so3	Salbutamol Stock out in past 3 months	Text	0=No,1=Yes
		ket_a	Ketamine available	Text	0=No,1=Yes
		ket_so3	Ketamine Stock out in past 3 months	Text	0=No,1=Yes
		lid_a	Lidocaine/Lignocaine available	Text	0=No,1=Yes
		lid_so3	Lidocaine/Lignocaine Stock out in past 3 months	Text	0=No,1=Yes
		atr_a	Atropine available	Text	0=No,1=Yes
		atr_so3	Atropine Stock out in past 3 months	Text	0=No,1=Yes
		nor_a	Normal saline available	Text	0=No,1=Yes
		nor_so3	Normal saline Stock out in past 3 months	Text	0=No,1=Yes
		5% _a	5% dextrose available	Text	0=No,1=Yes
		5% _so3	5% dextrose Stock out in past 3 months	Text	0=No,1=Yes
		rin_a	Ringers lactate available	Text	0=No,1=Yes
		rin_so3	Ringers lactate Stock out in past 3 months	Text	0=No,1=Yes
		con_a	Condoms available	Text	0=No,1=Yes
		con_so3	Condoms Stock out in past 3 months	Text	0=No,1=Yes
		ora_a	Oral contraceptives available	Text	0=No,1=Yes
		ora_so3	Oral contraceptives Stock out in past 3 months	Text	0=No,1=Yes
		eme_a	Emergency contraception available	Text	0=No,1=Yes
		eme_so3	Emergency contraception Stock out in past 3 months	Text	0=No,1=Yes
		hor_a	Hormonal injections available	Text	0=No,1=Yes
		hor_so3	Hormonal injections Stock out in past 3 months	Text	0=No,1=Yes
		imp_a	Implants available	Text	0=No,1=Yes
		imp_so3	Implants Stock out in past 3 months	Text	0=No,1=Yes
		int_a	Intrauterine devices available	Text	0=No,1=Yes
		int_so3	Intrauterine devices Stock out in past 3 months	Text	0=No,1=Yes
		hiv_a	HIV test kits available	Text	0=No,1=Yes
		hiv_so3	HIV test kits Stock out in past 3 months	Text	0=No,1=Yes
		syp_a	Syphilis test kits available	Text	0=No,1=Yes
		syp_so3	Syphilis test kits Stock out in past 3 months	Text	0=No,1=Yes
	Laboratory	bgl	Blood glucose	Text	0=No,1=Yes
		hgb	Hemoglobin	Text	0=No,1=Yes
		hct	Haematocrit (PCV)	Text	0=No,1=Yes
		ud	Urine dipstick	Text	0=No,1=Yes
		um	Urine microscopy	Text	0=No,1=Yes
		mm	Microscopy for malaria	Text	0=No,1=Yes
		rpr	VDRL/RPR	Text	0=No,1=Yes
		bgr	Blood Group	Text	0=No,1=Yes
		htk	HIV test Kit	Text	0=No,1=Yes
		fbc	Full blood count	Text	0=No,1=Yes
		lft	Liver function tests	Text	0=No,1=Yes
		rft	Renal function tests	Text	0=No,1=Yes
		se	Serum electrolytes	Text	0=No,1=Yes
		cd4	CD4 count	Text	0=No,1=Yes
		pvl	HIV plasma viral loads	Text	0=No,1=Yes
		bc	Blood culture	Text	0=No,1=Yes
		cm	Cross match	Text	0=No,1=Yes
		bri	Bilirubin	Text	0=No,1=Yes
		csmic	CSF microscopy	Text	0=No,1=Yes
		hba	HBsAg	Text	0=No,1=Yes
	MNH M&E Tools	pfs_a	Individual patient folders and sheets available	Text	0=No,1=Yes
		pfs_u	Individual patient folders and sheets utilized	Text	0=No,1=Yes
		anc_ra	ANC register available	Text	0=No,1=Yes
		anc_ru	ANC register utilized	Text	0=No,1=Yes
		ld_ra	Labour & Delivery register available	Text	0=No,1=Yes
		ld_ru	Labour & Delivery register utilized	Text	0=No,1=Yes
		pnc_ra	PNC register available	Text	0=No,1=Yes
		pnc_ru	PNC register utilized	Text	0=No,1=Yes
		fp_ra	Family Planning register available	Text	0=No,1=Yes
		fp_ru	Family Planning register utilized	Text	0=No,1=Yes
		ac_ra	Abortion Care register available	Text	0=No,1=Yes
		ac_ru	Abortion Care register utilized	Text	0=No,1=Yes
		pmt_ra	PMTCT register available	Text	0=No,1=Yes
		pmt_ru	PMTCT register utilized	Text	0=No,1=Yes
		r_ra	Referral register available	Text	0=No,1=Yes
		r_ru	Referral register utilized	Text	0=No,1=Yes
		anc_tsa	ANC Tally Sheet available	Text	0=No,1=Yes
		anc_tsu	ANC Tally Sheet utilized	Text	0=No,1=Yes
		fp_tsa	FP Tally Sheet available	Text	0=No,1=Yes
		fp_tsu	FP Tally Sheet utilized	Text	0=No,1=Yes
		imnca	Integrated Maternal & Neonatal Card available	Text	0=No,1=Yes
		imncu	Integrated Maternal & Neonatal Card utilized	Text	0=No,1=Yes
		mrfa	Monthly Report Format available	Text	0=No,1=Yes
		mrfu	Monthly Report Format utilized	Text	0=No,1=Yes
		qrfa	Quarterly Report Format available	Text	0=No,1=Yes
		qrfu	Quarterly Report Format utilized	Text	0=No,1=Yes
		apfa	Annual Report Format available	Text	0=No,1=Yes
		qrfu	Annual Report Format utilized	Text	0=No,1=Yes
		part_a	Partograph available	Text	0=No,1=Yes
		part_u	Partograph utilized	Text	0=No,1=Yes
		dc_a	Cardex /Drug chart available	Text	0=No,1=Yes
		dc_u	Cardex /Drug chart utilized	Text	0=No,1=Yes
		sc_a	Stock card available	Text	0=No,1=Yes
		sc_u	Stock card utilized	Text	0=No,1=Yes
		bc_a	Bin card available	Text	0=No,1=Yes
		bc_u	Bin card utilized	Text	0=No,1=Yes
	HMIS Data + Validation	anc1_jul15	Number of pregnant women with at least one ANC visit (H/HC 1.1.2.1),Jul'15	Number
		anc1_aug15	Number of pregnant women with at least one ANC visit (H/HC 1.1.2.1),aug'15	Number
		anc1_sep15	Number of pregnant women with at least one ANC visit (H/HC 1.1.2.1),sep'15	Number
		anc1_oct15	Number of pregnant women with at least one ANC visit (H/HC 1.1.2.1),oct'15	Number
		anc1_nov15	Number of pregnant women with at least one ANC visit (H/HC 1.1.2.1),nov'15	Number
		anc1_dec15	Number of pregnant women with at least one ANC visit (H/HC 1.1.2.1),dec'15	Number
		anc1_jan16	Number of pregnant women with at least one ANC visit (H/HC 1.1.2.1),jan'16	Number
		anc1_feb16	Number of pregnant women with at least one ANC visit (H/HC 1.1.2.1),feb'16	Number
		anc1_mar16	Number of pregnant women with at least one ANC visit (H/HC 1.1.2.1),mar'16	Number
		anc1_apr16	Number of pregnant women with at least one ANC visit (H/HC 1.1.2.1),apr'16	Number
		anc1_may16	Number of pregnant women with at least one ANC visit (H/HC 1.1.2.1),may'16	Number
		anc1_may16r	Number of pregnant women with at least one ANC visit (H/HC 1.1.2.1),may'16 recount	Number
		anc1_jun16	Number of pregnant women with at least one ANC visit (H/HC 1.1.2.1),jun'16	Number
		anc1_jun16r	Number of pregnant women with at least one ANC visit (H/HC 1.1.2.1),jun'16 recount	Number
		anc1_jul16	Number of pregnant women with at least one ANC visit (H/HC 1.1.2.1),jul'16	Number
		anc1_jul16r	Number of pregnant women with at least one ANC visit (H/HC 1.1.2.1),jul'16 recount	Number
		anc1_aug16	Number of pregnant women with at least one ANC visit (H/HC 1.1.2.1),aug'16	Number
		anc1_aug16r	Number of pregnant women with at least one ANC visit (H/HC 1.1.2.1), aug'16 recount	Number
		anc4_jul15	Number of pregnant women that received antenatal care at least four visits (H/HC 1.1.3.1),Jul'15	Number
		anc4_aug15	Number of pregnant women that received antenatal care at least four visits (H/HC 1.1.3.1),aug'15	Number
		anc4_sep15	Number of pregnant women that received antenatal care at least four visits (H/HC 1.1.3.1),sep'15	Number
		anc4_oct15	Number of pregnant women that received antenatal care at least four visits (H/HC 1.1.3.1),oct'15	Number
		anc4_nov15	Number of pregnant women that received antenatal care at least four visits (H/HC 1.1.3.1),nov'15	Number
		anc4_dec15	Number of pregnant women that received antenatal care at least four visits (H/HC 1.1.3.1),dec'15	Number
		anc4_jan16	Number of pregnant women that received antenatal care at least four visits (H/HC 1.1.3.1),jan'16	Number
		anc4_feb16	Number of pregnant women that received antenatal care at least four visits (H/HC 1.1.3.1),feb'16	Number
		anc4_mar16	Number of pregnant women that received antenatal care at least four visits (H/HC 1.1.3.1),mar'16	Number
		anc4_apr16	Number of pregnant women that received antenatal care at least four visits (H/HC 1.1.3.1),apr'16	Number
		anc4_may16	Number of pregnant women that received antenatal care at least four visits (H/HC 1.1.3.1),may'16	Number
		anc4_may16r	Number of pregnant women that received antenatal care at least four visits (H/HC 1.1.3.1),may'16 recount	Number
		anc4_jun16	Number of pregnant women that received antenatal care at least four visits (H/HC 1.1.3.1),jun'16	Number
		anc4_jun16r	Number of pregnant women that received antenatal care at least four visits (H/HC 1.1.3.1),jun'16 recount	Number
		anc4_jul16	Number of pregnant women that received antenatal care at least four visits (H/HC 1.1.3.1)),jul'16	Number
		anc4_jul16r	Number of pregnant women that received antenatal care at least four visits (H/HC 1.1.3.1),jul'16 recount	Number
		anc4_aug16	Number of pregnant women that received antenatal care at least four visits (H/HC 1.1.3.1),aug'16	Number
		anc4_aug16r	Number of pregnant women that received antenatal care at least four visits (H/HC 1.1.3.1),aug'16 recount	Number
		st_jul15	Number of pregnant women tested for syphilis (H/HC 1.1.4.1),Jul'15	Number
		st_aug15	Number of pregnant women tested for syphilis (H/HC 1.1.4.1),aug'15	Number
		st_sep15	Number of pregnant women tested for syphilis (H/HC 1.1.4.1),sep'15	Number
		st_oct15	Number of pregnant women tested for syphilis (H/HC 1.1.4.1),oct'15	Number
		st_nov15	Number of pregnant women tested for syphilis (H/HC 1.1.4.1),nov'15	Number
		st_dec15	Number of pregnant women tested for syphilis (H/HC 1.1.4.1),dec'15	Number
		st_jan16	Number of pregnant women tested for syphilis (H/HC 1.1.4.1),jan'16	Number
		st_feb16	Number of pregnant women tested for syphilis (H/HC 1.1.4.1),feb'16	Number
		st_mar16	Number of pregnant women tested for syphilis (H/HC 1.1.4.1),mar'16	Number
		st_apr16	Number of pregnant women tested for syphilis (H/HC 1.1.4.1),apr'16	Number
		st_may16	Number of pregnant women tested for syphilis (H/HC 1.1.4.1),may'16	Number
		st_may16r	Number of pregnant women tested for syphilis (H/HC 1.1.4.1),may'16 recount	Number
		st_jun16	Number of pregnant women tested for syphilis (H/HC 1.1.4.1),jun'16	Number
		st_jun16r	Number of pregnant women tested for syphilis (H/HC 1.1.4.1),jun'16 recount	Number
		st_jul16	Number of pregnant women tested for syphilis (H/HC 1.1.4.1),jul'16	Number
		st_jul16r	Number of pregnant women tested for syphilis (H/HC 1.1.4.1),jul'16 recount	Number
		st_aug16	Number of pregnant women tested for syphilis (H/HC 1.1.4.1),aug'16	Number
		st_aug16r	Number of pregnant women tested for syphilis (H/HC 1.1.4.1),aug'16 recount	Number
		sba_jul15	Total number of births attended by skilled health attendants (H/HC C.1.1.5.1),Jul'15	Number
		sba_aug15	Total number of births attended by skilled health attendants (H/HC C.1.1.5.1),aug'15	Number
		sba_sep15	Total number of births attended by skilled health attendants (H/HC C.1.1.5.1),sep'15	Number
		sba_oct15	Total number of births attended by skilled health attendants (H/HC C.1.1.5.1),oct'15	Number
		sba_nov15	Total number of births attended by skilled health attendants (H/HC C.1.1.5.1),nov'15	Number
		sba_dec15	Total number of births attended by skilled health attendants (H/HC C.1.1.5.1),dec'15	Number
		sba_jan16	Total number of births attended by skilled health attendants (H/HC C.1.1.5.1),jan'16	Number
		sba_feb16	Total number of births attended by skilled health attendants (H/HC C.1.1.5.1),feb'16	Number
		sba_mar16	Total number of births attended by skilled health attendants (H/HC C.1.1.5.1),mar'16	Number
		sba_apr16	Total number of births attended by skilled health attendants (H/HC C.1.1.5.1),apr'16	Number
		sba_may16	Total number of births attended by skilled health attendants (H/HC C.1.1.5.1),may'16	Number
		sba_may16r	Total number of births attended by skilled health attendants (H/HC C.1.1.5.1),may'16 recount	Number
		sba_jun16	Total number of births attended by skilled health attendants (H/HC C.1.1.5.1),jun'16	Number
		sba_jun16r	Total number of births attended by skilled health attendants (H/HC C.1.1.5.1),jun'16 recount	Number
		sba_jul16	Total number of births attended by skilled health attendants (H/HC C.1.1.5.1),jul'16	Number
		sba_jul16r	Total number of births attended by skilled health attendants (H/HC C.1.1.5.1),jul'16 recount	Number
		sba_aug16	Total number of births attended by skilled health attendants (H/HC C.1.1.5.1),aug'16	Number
		sba_aug16r	Total number of births attended by skilled health attendants (H/HC C.1.1.5.1),aug'16 recount	Number
		hed_jul15	Number of births attended by health extension workers at Health Post (1.1.6.1),jul15	Number
		hed_aug15	Number of births attended by health extension workers at Health Post (1.1.6.1),aug15	Number
		hed_sep15	Number of births attended by health extension workers at Health Post (1.1.6.1),sep15	Number
		hed_oct15	Number of births attended by health extension workers at Health Post (1.1.6.1),oct15	Number
		hed_nov15	Number of births attended by health extension workers at Health Post (1.1.6.1),nov15	Number
		hed_dec15	Number of births attended by health extension workers at Health Post (1.1.6.1),dec15	Number
		hed_jan16	Number of births attended by health extension workers at Health Post (1.1.6.1),jan16	Number
		hed_feb16	Number of births attended by health extension workers at Health Post (1.1.6.1),feb16	Number
		hed_mar16	Number of births attended by health extension workers at Health Post (1.1.6.1),mar16	Number
		hed_apr16	Number of births attended by health extension workers at Health Post (1.1.6.1),apr16	Number
		hed_may16	Number of births attended by health extension workers at Health Post (1.1.6.1),may16	Number
		hed_jun16	Number of births attended by health extension workers at Health Post (1.1.6.1),jun16	Number
		hed_jul16	Number of births attended by health extension workers at Health Post (1.1.6.1),jul16	Number
		hed_aug16	Number of births attended by health extension workers at Health Post (1.1.6.1),aug16	Number
		48jul15	Number of postnatal visits within 48 hours of delivery (H/HC 1.1.7.1) ,Jul'15	Number
		48aug15	Number of postnatal visits within 48 hours of delivery (H/HC 1.1.7.1) ,aug'15	Number
		48sep15	Number of postnatal visits within 48 hours of delivery (H/HC 1.1.7.1) ,sep'15	Number
		48oct15	Number of postnatal visits within 48 hours of delivery (H/HC 1.1.7.1) ,oct'15	Number
		48nov15	Number of postnatal visits within 48 hours of delivery (H/HC 1.1.7.1) ,nov'15	Number
		48dec15	Number of postnatal visits within 48 hours of delivery (H/HC 1.1.7.1) ,dec'15	Number
		48jan16	Number of postnatal visits within 48 hours of delivery (H/HC 1.1.7.1) ,jan'16	Number
		48feb16	Number of postnatal visits within 48 hours of delivery (H/HC 1.1.7.1) ,feb'16	Number
		48mar16	Number of postnatal visits within 48 hours of delivery (H/HC 1.1.7.1) ,mar'16	Number
		48apr16	Number of postnatal visits within 48 hours of delivery (H/HC 1.1.7.1) ,apr'16	Number
		48may16	Number of postnatal visits within 48 hours of delivery (H/HC 1.1.7.1) ,may'16	Number
		48may16r	Number of postnatal visits within 48 hours of delivery (H/HC 1.1.7.1) ,may'16 recount	Number
		48jun16	Number of postnatal visits within 48 hours of delivery (H/HC 1.1.7.1) ,jun'16	Number
		48jun16r	Number of postnatal visits within 48 hours of delivery (H/HC 1.1.7.1) ,jun'16 recount	Number
		48jul16	Number of postnatal visits within 48 hours of delivery (H/HC 1.1.7.1) ,jul'16	Number
		48jul16r	Number of postnatal visits within 48 hours of delivery (H/HC 1.1.7.1) ,jul'16 recount	Number
		48aug16	Number of postnatal visits within 48 hours of delivery (H/HC 1.1.7.1) ,aug'16	Number
		48aug16r	Number of postnatal visits within 48 hours of delivery (H/HC 1.1.7.1) ,aug'16 recount	Number
		72jul15	Number of postnatal visits within 2-3 days of delivery (H/HC 1.1.7.2,),Jul'15	Number
		72aug15	Number of postnatal visits within 2-3 days of delivery (H/HC 1.1.7.2,),aug'15	Number
		72sep15	Number of postnatal visits within 2-3 days of delivery (H/HC 1.1.7.2,),sep'15	Number
		72oct15	Number of postnatal visits within 2-3 days of delivery (H/HC 1.1.7.2,),oct'15	Number
		72nov15	Number of postnatal visits within 2-3 days of delivery (H/HC 1.1.7.2,),nov'15	Number
		72dec15	Number of postnatal visits within 2-3 days of delivery (H/HC 1.1.7.2,),dec'15	Number
		72jan16	Number of postnatal visits within 2-3 days of delivery (H/HC 1.1.7.2,),jan'16	Number
		72feb16	Number of postnatal visits within 2-3 days of delivery (H/HC 1.1.7.2,),feb'16	Number
		72mar16	Number of postnatal visits within 2-3 days of delivery (H/HC 1.1.7.2,),mar'16	Number
		72apr16	Number of postnatal visits within 2-3 days of delivery (H/HC 1.1.7.2,),apr'16	Number
		72may16	Number of postnatal visits within 2-3 days of delivery (H/HC 1.1.7.2,),may'16	Number
		72may16r	Number of postnatal visits within 2-3 days of delivery (H/HC 1.1.7.2,),may'16 recount	Number
		72jun16	Number of postnatal visits within 2-3 days of delivery (H/HC 1.1.7.2,),jun'16	Number
		72jun16r	Number of postnatal visits within 2-3 days of delivery (H/HC 1.1.7.2,),jun'16 recount	Number
		72jul16	Number of postnatal visits within 2-3 days of delivery (H/HC 1.1.7.2,),jul'16	Number
		72jul16r	Number of postnatal visits within 2-3 days of delivery (H/HC 1.1.7.2,),jul'16 recount	Number
		72aug16	Number of postnatal visits within 2-3 days of delivery (H/HC 1.1.7.2,),aug'16	Number
		72aug16r	Number of postnatal visits within 2-3 days of delivery (H/HC 1.1.7.2,),aug'16 recount	Number
		7djul15	Number of postnatal visits within 4-7 days of delivery (H/HC 1.1.7.3,),Jul'15	Number
		7daug15	Number of postnatal visits within 4-7 days of delivery (H/HC 1.1.7.3,),aug'15	Number
		7dsep15	Number of postnatal visits within 4-7 days of delivery (H/HC 1.1.7.3,),sep'15	Number
		7doct15	Number of postnatal visits within 4-7 days of delivery (H/HC 1.1.7.3,),oct'15	Number
		7dnov15	Number of postnatal visits within 4-7 days of delivery (H/HC 1.1.7.3,),nov'15	Number
		7ddec15	Number of postnatal visits within 4-7 days of delivery (H/HC 1.1.7.3,),dec'15	Number
		7djan16	Number of postnatal visits within 4-7 days of delivery (H/HC 1.1.7.3,),jan'16	Number
		7dfeb16	Number of postnatal visits within 4-7 days of delivery (H/HC 1.1.7.3,),feb'16	Number
		7dmar16	Number of postnatal visits within 4-7 days of delivery (H/HC 1.1.7.3,),mar'16	Number
		7dapr16	Number of postnatal visits within 4-7 days of delivery (H/HC 1.1.7.3,),apr'16	Number
		7dmay16	Number of postnatal visits within 4-7 days of delivery (H/HC 1.1.7.3,),may'16	Number
		7dmay16r	Number of postnatal visits within 4-7 days of delivery (H/HC 1.1.7.3,),may'16 recount	Number
		7djun16	Number of postnatal visits within 4-7 days of delivery (H/HC 1.1.7.3,),jun'16	Number
		7djun16r	Number of postnatal visits within 4-7 days of delivery (H/HC 1.1.7.3,),jun'16 recount	Number
		7djul16	Number of postnatal visits within 4-7 days of delivery (H/HC 1.1.7.3,),jul'16	Number
		7djul16r	Number of postnatal visits within 4-7 days of delivery (H/HC 1.1.7.3,),jul'16 recount	Number
		7daug16	Number of postnatal visits within 4-7 days of delivery (H/HC 1.1.7.3,),aug'16	Number
		7daug16r	Number of postnatal visits within 4-7 days of delivery (H/HC 1.1.7.3,),aug'16 recount	Number
		jul15md	Number of maternal deaths in health facility (H/HC C1.1.1.10.1),Jul'15	Number
		aug15md	Number of maternal deaths in health facility (H/HC C1.1.1.10.1),aug'15	Number
		sep15md	Number of maternal deaths in health facility (H/HC C1.1.1.10.1),sep'15	Number
		oct15md	Number of maternal deaths in health facility (H/HC C1.1.1.10.1),oct'15	Number
		nov15md	Number of maternal deaths in health facility (H/HC C1.1.1.10.1),nov'15	Number
		dec15md	Number of maternal deaths in health facility (H/HC C1.1.1.10.1),dec'15	Number
		jan16md	Number of maternal deaths in health facility (H/HC C1.1.1.10.1),jan'16	Number
		feb16md	Number of maternal deaths in health facility (H/HC C1.1.1.10.1),feb'16	Number
		mar16md	Number of maternal deaths in health facility (H/HC C1.1.1.10.1),mar'16	Number
		apr16md	Number of maternal deaths in health facility (H/HC C1.1.1.10.1),apr'16	Number
		may16md	Number of maternal deaths in health facility (H/HC C1.1.1.10.1),may'16	Number
		may16md_r	Number of maternal deaths in health facility (H/HC C1.1.1.10.1),may'16 recount	Number
		jun16md	Number of maternal deaths in health facility (H/HC C1.1.1.10.1),jun'16	Number
		jun16md_r	Number of maternal deaths in health facility (H/HC C1.1.1.10.1),jun'16 recount	Number
		jul16md	Number of maternal deaths in health facility (H/HC C1.1.1.10.1),jul'16	Number
		jul16md_r	Number of maternal deaths in health facility (H/HC C1.1.1.10.1),jul'16 recount	Number
		aug16md	Number of maternal deaths in health facility (H/HC C1.1.1.10.1),aug'16	Number
		aug16md_r	Number of maternal deaths in health facility (H/HC C1.1.1.10.1),aug'16 recount	Number
		mdhjul15	Number of maternal deaths at home,jul15	Number
		mdhaug15	Number of maternal deaths at home,aug15	Number
		mdhsep15	Number of maternal deaths at home,sep15	Number
		mdhoct15	Number of maternal deaths at home,oct15	Number
		mdhnov15	Number of maternal deaths at home,nov15	Number
		mdhdec15	Number of maternal deaths at home,dec15	Number
		mdhjan16	Number of maternal deaths at home,jan16	Number
		mdhfeb16	Number of maternal deaths at home,feb16	Number
		mdhmar16	Number of maternal deaths at home,mar16	Number
		mdhapr16	Number of maternal deaths at home,apr16	Number
		mdhmay16	Number of maternal deaths at home,may16	Number
		mdhjun16	Number of maternal deaths at home,jun16	Number
		mdhjul16	Number of maternal deaths at home,jul16	Number
		mdhaug16	Number of maternal deaths at home,aug16	Number
		dwfjul15	Number of maternal deaths on the way to health facility,jul15	Number
		dwfaug15	Number of maternal deaths on the way to health facility,aug15	Number
		dwfsep15	Number of maternal deaths on the way to health facility,sep15	Number
		dwfoct15	Number of maternal deaths on the way to health facility,oct15	Number
		dwfnov15	Number of maternal deaths on the way to health facility,nov15	Number
		dwfdec15	Number of maternal deaths on the way to health facility,dec15	Number
		dwfjan16	Number of maternal deaths on the way to health facility,jan16	Number
		dwffeb16	Number of maternal deaths on the way to health facility,feb16	Number
		dwfmar16	Number of maternal deaths on the way to health facility,mar16	Number
		dwfapr16	Number of maternal deaths on the way to health facility,apr16	Number
		dwfmay16	Number of maternal deaths on the way to health facility,may16	Number
		dwfjun16	Number of maternal deaths on the way to health facility,jun16	Number
		dwfjul16	Number of maternal deaths on the way to health facility,jul16	Number
		dwfaug16	Number of maternal deaths on the way to health facility,aug16	Number
		dhpjul15	Number of maternal deaths at health post,jul15	Number
		dhpaug15	Number of maternal deaths at health post,aug15	Number
		dhpsep15	Number of maternal deaths at health post,sep15	Number
		dhpoct15	Number of maternal deaths at health post,oct15	Number
		dhpnov15	Number of maternal deaths at health post,nov15	Number
		dhpdec15	Number of maternal deaths at health post,dec15	Number
		dhpjan16	Number of maternal deaths at health post,jan16	Number
		dhpfeb16	Number of maternal deaths at health post,feb16	Number
		dhpmar16	Number of maternal deaths at health post,mar16	Number
		dhpapr16	Number of maternal deaths at health post,apr16	Number
		dhpmay16	Number of maternal deaths at health post,may16	Number
		dhpjun16	Number of maternal deaths at health post,jun16	Number
		dhpjul16	Number of maternal deaths at health post,jul16	Number
		dhpaug16	Number of maternal deaths at health post,aug16	Number
		jul15sb	Number of stillbirths (H/HC/ 1.1.12.1),Jul'15	Number
		aug15sb	Number of stillbirths (H/HC/ 1.1.12.1),aug'15	Number
		sep15sb	Number of stillbirths (H/HC/ 1.1.12.1),sep'15	Number
		oct15sb	Number of stillbirths (H/HC/ 1.1.12.1),oct'15	Number
		nov15sb	Number of stillbirths (H/HC/ 1.1.12.1),nov'15	Number
		dec15sb	Number of stillbirths (H/HC/ 1.1.12.1),dec'15	Number
		jan16sb	Number of stillbirths (H/HC/ 1.1.12.1),jan'16	Number
		feb16sb	Number of stillbirths (H/HC/ 1.1.12.1),feb'16	Number
		mar16sb	Number of stillbirths (H/HC/ 1.1.12.1),mar'16	Number
		apr16sb	Number of stillbirths (H/HC/ 1.1.12.1),apr'16	Number
		may16sb	Number of stillbirths (H/HC/ 1.1.12.1),may'16	Number
		may16sb_r	Number of stillbirths (H/HC/ 1.1.12.1),may'16 recount	Number
		jun16sb	Number of stillbirths (H/HC/ 1.1.12.1),jun'16	Number
		jun16sb_r	Number of stillbirths (H/HC/ 1.1.12.1),jun'16 recount	Number
		jul16sb	Number of stillbirths (H/HC/ 1.1.12.1),jul'16	Number
		jul16sb_r	Number of stillbirths (H/HC/ 1.1.12.1),jul'16 recount	Number
		aug16sb	Number of stillbirths (H/HC/ 1.1.12.1),aug'16	Number
		aug16sb_r	Number of stillbirths (H/HC/ 1.1.12.1),aug'16 recount	Number
		jul15lb	Number of live births (H/HC/ 1.1.12.2),Jul'15	Number
		aug15lb	Number of live births (H/HC/ 1.1.12.2),aug'15	Number
		sep15lb	Number of live births (H/HC/ 1.1.12.2),sep'15	Number
		oct15lb	Number of live births (H/HC/ 1.1.12.2),oct'15	Number
		nov15lb	Number of live births (H/HC/ 1.1.12.2),nov'15	Number
		dec15lb	Number of live births (H/HC/ 1.1.12.2),dec'15	Number
		jan16lb	Number of live births (H/HC/ 1.1.12.2),jan'16	Number
		feb16lb	Number of live births (H/HC/ 1.1.12.2),feb'16	Number
		mar16lb	Number of live births (H/HC/ 1.1.12.2),mar'16	Number
		apr16lb	Number of live births (H/HC/ 1.1.12.2),apr'16	Number
		may16lb	Number of live births (H/HC/ 1.1.12.2),may'16	Number
		may16lb_r	Number of live births (H/HC/ 1.1.12.2),may'16 recount	Number
		jun16lb	Number of live births (H/HC/ 1.1.12.2),jun'16	Number
		jun16lb_r	Number of live births (H/HC/ 1.1.12.2),jun'16 recount	Number
		jul16lb	Number of live births (H/HC/ 1.1.12.2),jul'16	Number
		jul16lb_r	Number of live births (H/HC/ 1.1.12.2),jul'16 recount	Number
		aug16lb	Number of live births (H/HC/ 1.1.12.2),aug'16	Number
		aug16lb_r	Number of live births (H/HC/ 1.1.12.2),aug'16 recount	Number
		jul15prt	Number of babies born in a facility who were pre-term at or under 2500g at birth,Jul'15	Number
		aug15prt	Number of babies born in a facility who were pre-term at or under 2500g at birth,aug'15	Number
		sep15prt	Number of babies born in a facility who were pre-term at or under 2500g at birth,sep'15	Number
		oct15prt	Number of babies born in a facility who were pre-term at or under 2500g at birth,oct'15	Number
		nov15prt	Number of babies born in a facility who were pre-term at or under 2500g at birth,nov'15	Number
		dec15prt	Number of babies born in a facility who were pre-term at or under 2500g at birth,dec'15	Number
		jan16prt	Number of babies born in a facility who were pre-term at or under 2500g at birth,jan'16	Number
		feb16prt	Number of babies born in a facility who were pre-term at or under 2500g at birth,feb'16	Number
		mar16prt	Number of babies born in a facility who were pre-term at or under 2500g at birth,mar'16	Number
		apr16prt	Number of babies born in a facility who were pre-term at or under 2500g at birth,apr'16	Number
		may16prt	Number of babies born in a facility who were pre-term at or under 2500g at birth,may'16	Number
		may16prt_r	Number of babies born in a facility who were pre-term at or under 2500g at birth,may'16 recount	Number
		jun16prt	Number of babies born in a facility who were pre-term at or under 2500g at birth,jun'16	Number
		jun16prt_r	Number of babies born in a facility who were pre-term at or under 2500g at birth,jun'16 recount	Number
		jul16prt	Number of babies born in a facility who were pre-term at or under 2500g at birth,jul'16	Number
		jul16prt_r	Number of babies born in a facility who were pre-term at or under 2500g at birth,jul'16 recount	Number
		aug16prt	Number of babies born in a facility who were pre-term at or under 2500g at birth,aug'16	Number
		aug16prt_r	Number of babies born in a facility who were pre-term at or under 2500g at birth,aug'16 recount	Number
		24hdjul15	Number of neonatal deaths in the first 24hrs of life (institutional),Jul'15	Number
		24hdaug15	Number of neonatal deaths in the first 24hrs of life (institutional),aug'15	Number
		24hdsep15	Number of neonatal deaths in the first 24hrs of life (institutional),sep'15	Number
		24hdoct15	Number of neonatal deaths in the first 24hrs of life (institutional),oct'15	Number
		24hdnov15	Number of neonatal deaths in the first 24hrs of life (institutional),nov'15	Number
		24hddec15	Number of neonatal deaths in the first 24hrs of life (institutional),dec'15	Number
		24hdjan16	Number of neonatal deaths in the first 24hrs of life (institutional),jan'16	Number
		24hdfeb16	Number of neonatal deaths in the first 24hrs of life (institutional),feb'16	Number
		24hdmar16	Number of neonatal deaths in the first 24hrs of life (institutional),mar'16	Number
		24hdapr16	Number of neonatal deaths in the first 24hrs of life (institutional),apr'16	Number
		24hdmay16	Number of neonatal deaths in the first 24hrs of life (institutional),may'16	Number
		24hdmay16r	Number of neonatal deaths in the first 24hrs of life (institutional),may'16 recount	Number
		24hdjun16	Number of neonatal deaths in the first 24hrs of life (institutional),jun'16	Number
		24hdjun16r	Number of neonatal deaths in the first 24hrs of life (institutional),jun'16 recount	Number
		24hdjul16	Number of neonatal deaths in the first 24hrs of life (institutional),jul'16	Number
		24hdjul16r	Number of neonatal deaths in the first 24hrs of life (institutional),jul'16 recount	Number
		24hdaug16	Number of neonatal deaths in the first 24hrs of life (institutional),aug'16	Number
		24hdaug16r	Number of neonatal deaths in the first 24hrs of life (institutional),aug'16 recount	Number
		6djul15	Number of neonatal deaths between 1 and 6 days of life (institutional)+D605:D621,Jul'15	Number
		6daug15	Number of neonatal deaths between 1 and 6 days of life (institutional),aug'15	Number
		6dsep15	Number of neonatal deaths between 1 and 6 days of life (institutional),sep'15	Number
		6doct15	Number of neonatal deaths between 1 and 6 days of life (institutional),oct'15	Number
		6dnov15	Number of neonatal deaths between 1 and 6 days of life (institutional),nov'15	Number
		6ddec15	Number of neonatal deaths between 1 and 6 days of life (institutional),dec'15	Number
		6djan16	Number of neonatal deaths between 1 and 6 days of life (institutional),jan'16	Number
		6dfeb16	Number of neonatal deaths between 1 and 6 days of life (institutional),feb'16	Number
		6dmar16	Number of neonatal deaths between 1 and 6 days of life (institutional),mar'16	Number
		6dapr16	Number of neonatal deaths between 1 and 6 days of life (institutional),apr'16	Number
		6dmay16	Number of neonatal deaths between 1 and 6 days of life (institutional),may'16	Number
		6dmay16r	Number of neonatal deaths between 1 and 6 days of life (institutional),may'16 recount	Number
		6djun16	Number of neonatal deaths between 1 and 6 days of life (institutional),jun'16	Number
		6djun16r	Number of neonatal deaths between 1 and 6 days of life (institutional),jun'16 recount	Number
		6djul16	Number of neonatal deaths between 1 and 6 days of life (institutional),jul'16	Number
		6djul16r	Number of neonatal deaths between 1 and 6 days of life (institutional),jul'16 recount	Number
		6daug16	Number of neonatal deaths between 1 and 6 days of life (institutional),aug'16	Number
		6daug16r	Number of neonatal deaths between 1 and 6 days of life (institutional),aug'16 recount	Number
		phtjul15	Number of pregnant women tested for HIV and know their result during pregnancy,Jul'15	Number
		phtaug15	Number of pregnant women tested for HIV and know their result during pregnancy,aug'15	Number
		phtsep15	Number of pregnant women tested for HIV and know their result during pregnancy,sep'15	Number
		phtoct15	Number of pregnant women tested for HIV and know their result during pregnancy,oct'15	Number
		phtnov15	Number of pregnant women tested for HIV and know their result during pregnancy,nov'15	Number
		phtdec15	Number of pregnant women tested for HIV and know their result during pregnancy,dec'15	Number
		phtjan16	Number of pregnant women tested for HIV and know their result during pregnancy,jan'16	Number
		phtfeb16	Number of pregnant women tested for HIV and know their result during pregnancy,feb'16	Number
		phtmar16	Number of pregnant women tested for HIV and know their result during pregnancy,mar'16	Number
		phtapr16	Number of pregnant women tested for HIV and know their result during pregnancy,apr'16	Number
		phtmay16	Number of pregnant women tested for HIV and know their result during pregnancy,may'16	Number
		phtjun16	Number of pregnant women tested for HIV and know their result during pregnancy,jun'16	Number
		phtjul16	Number of pregnant women tested for HIV and know their result during pregnancy,jul'16	Number
		phtaug16	Number of pregnant women tested for HIV and know their result during pregnancy,aug'16	Number
		dhtjul15	Number of pregnant women tested for HIV and know their result during Labor and Delivery,Jul'15	Number
		dhtaug15	Number of pregnant women tested for HIV and know their result during Labor and Delivery,aug'15	Number
		dhtsep15	Number of pregnant women tested for HIV and know their result during Labor and Delivery,sep'15	Number
		dhtoct15	Number of pregnant women tested for HIV and know their result during Labor and Delivery,oct'15	Number
		dhtnov15	Number of pregnant women tested for HIV and know their result during Labor and Delivery,nov'15	Number
		dhtdec15	Number of pregnant women tested for HIV and know their result during Labor and Delivery,dec'15	Number
		dhtjan16	Number of pregnant women tested for HIV and know their result during Labor and Delivery,jan'16	Number
		dhtfeb16	Number of pregnant women tested for HIV and know their result during Labor and Delivery,feb'16	Number
		dhtmar16	Number of pregnant women tested for HIV and know their result during Labor and Delivery,mar'16	Number
		dhtapr16	Number of pregnant women tested for HIV and know their result during Labor and Delivery,apr'16	Number
		dhtmay16	Number of pregnant women tested for HIV and know their result during Labor and Delivery,may'16	Number
		dhtjun16	Number of pregnant women tested for HIV and know their result during Labor and Delivery,jun'16	Number
		dhtjul16	Number of pregnant women tested for HIV and know their result during Labor and Delivery,jul'16	Number
		dhtaug16	Number of pregnant women tested for HIV and know their result during Labor and Delivery,aug'16	Number
		pntjul15	Number of pregnant women tested for HIV and know their result during postpartum period,Jul'15	Number
		pntaug15	Number of pregnant women tested for HIV and know their result during postpartum period,aug'15	Number
		pntsep15	Number of pregnant women tested for HIV and know their result during postpartum period,sep'15	Number
		pntoct15	Number of pregnant women tested for HIV and know their result during postpartum period,oct'15	Number
		pntnov15	Number of pregnant women tested for HIV and know their result during postpartum period,nov'15	Number
		pntdec15	Number of pregnant women tested for HIV and know their result during postpartum period,dec'15	Number
		pntjan16	Number of pregnant women tested for HIV and know their result during postpartum period,jan'16	Number
		pntfeb16	Number of pregnant women tested for HIV and know their result during postpartum period,feb'16	Number
		pntmar16	Number of pregnant women tested for HIV and know their result during postpartum period,mar'16	Number
		pntapr16	Number of pregnant women tested for HIV and know their result during postpartum period,apr'16	Number
		pntmay16	Number of pregnant women tested for HIV and know their result during postpartum period,may'16	Number
		pntjun16	Number of pregnant women tested for HIV and know their result during postpartum period,jun'16	Number
		pntjul16	Number of pregnant women tested for HIV and know their result during postpartum period,jul'16	Number
		pntaug16	Number of pregnant women tested for HIV and know their result during postpartum period,aug'16	Number
		tpjul15	Number of women tested positive for HIV,Jul'15	Number
		tpaug15	Number of women tested positive for HIV,aug'15	Number
		tpsep15	Number of women tested positive for HIV,sep'15	Number
		tpoct15	Number of women tested positive for HIV,oct'15	Number
		tpnov15	Number of women tested positive for HIV,nov'15	Number
		tpdec15	Number of women tested positive for HIV,dec'15	Number
		tpjan16	Number of women tested positive for HIV,jan'16	Number
		tpfeb16	Number of women tested positive for HIV,feb'16	Number
		tpmar16	Number of women tested positive for HIV,mar'16	Number
		tpapr16	Number of women tested positive for HIV,apr'16	Number
		tpmay16	Number of women tested positive for HIV,may'16	Number
		tpjun16	Number of women tested positive for HIV,jun'16	Number
		tpjul16	Number of women tested positive for HIV,jul'16	Number
		tpaug16	Number of women tested positive for HIV,aug'16	Number
		B+ancjul15	Number of HIV positive pregnant women who received ART to reduce the risk of mother to child transmission during ANC for the first time,Jul'15	Number
		B+ancaug15	Number of HIV positive pregnant women who received ART to reduce the risk of mother to child transmission during ANC for the first time,aug'15	Number
		B+ancsep15	Number of HIV positive pregnant women who received ART to reduce the risk of mother to child transmission during ANC for the first time,sep'15	Number
		B+ancoct15	Number of HIV positive pregnant women who received ART to reduce the risk of mother to child transmission during ANC for the first time,oct'15	Number
		B+ancnov15	Number of HIV positive pregnant women who received ART to reduce the risk of mother to child transmission during ANC for the first time,nov'15	Number
		B+ancdec15	Number of HIV positive pregnant women who received ART to reduce the risk of mother to child transmission during ANC for the first time,dec'15	Number
		B+ancjan16	Number of HIV positive pregnant women who received ART to reduce the risk of mother to child transmission during ANC for the first time,jan'16	Number
		B+ancfeb16	Number of HIV positive pregnant women who received ART to reduce the risk of mother to child transmission during ANC for the first time,feb'16	Number
		B+ancmar16	Number of HIV positive pregnant women who received ART to reduce the risk of mother to child transmission during ANC for the first time,mar'16	Number
		B+ancapr16	Number of HIV positive pregnant women who received ART to reduce the risk of mother to child transmission during ANC for the first time,apr'16	Number
		B+ancmay16	Number of HIV positive pregnant women who received ART to reduce the risk of mother to child transmission during ANC for the first time,may'16	Number
		B+ancjun16	Number of HIV positive pregnant women who received ART to reduce the risk of mother to child transmission during ANC for the first time,jun'16	Number
		B+ancjul16	Number of HIV positive pregnant women who received ART to reduce the risk of mother to child transmission during ANC for the first time,jul'16	Number
		B+ancaug16	Number of HIV positive pregnant women who received ART to reduce the risk of mother to child transmission during ANC for the first time,aug'16	Number
		B+ldjul15	Number of HIV positive pregnant women who received ART to reduce the risk of mother to child transmission during L&D for the first time,Jul'15	Number
		B+ldaug15	Number of HIV positive pregnant women who received ART to reduce the risk of mother to child transmission during L&D for the first time,aug'15	Number
		B+ldsep15	Number of HIV positive pregnant women who received ART to reduce the risk of mother to child transmission during L&D for the first time,sep'15	Number
		B+ldoct15	Number of HIV positive pregnant women who received ART to reduce the risk of mother to child transmission during L&D for the first time,oct'15	Number
		B+ldnov15	Number of HIV positive pregnant women who received ART to reduce the risk of mother to child transmission during L&D for the first time,nov'15	Number
		B+lddec15	Number of HIV positive pregnant women who received ART to reduce the risk of mother to child transmission during L&D for the first time,dec'15	Number
		B+ldjan16	Number of HIV positive pregnant women who received ART to reduce the risk of mother to child transmission during L&D for the first time,jan'16	Number
		B+ldfeb16	Number of HIV positive pregnant women who received ART to reduce the risk of mother to child transmission during L&D for the first time,feb'16	Number
		B+ldmar16	Number of HIV positive pregnant women who received ART to reduce the risk of mother to child transmission during L&D for the first time,mar'16	Number
		B+ldapr16	Number of HIV positive pregnant women who received ART to reduce the risk of mother to child transmission during L&D for the first time,apr'16	Number
		B+ldmay16	Number of HIV positive pregnant women who received ART to reduce the risk of mother to child transmission during L&D for the first time,may'16	Number
		B+ldjun16	Number of HIV positive pregnant women who received ART to reduce the risk of mother to child transmission during L&D for the first time,jun'16	Number
		B+ldjul16	Number of HIV positive pregnant women who received ART to reduce the risk of mother to child transmission during L&D for the first time,jul'16	Number
		B+ldaug16	Number of HIV positive pregnant women who received ART to reduce the risk of mother to child transmission during L&D for the first time,aug'16	Number
		B+pncjul15	Number of HIV positive pregnant women who received ART to reduce the risk of mother to child transmission during PNC for the first time,Jul'15	Number
		B+pncaug15	Number of HIV positive pregnant women who received ART to reduce the risk of mother to child transmission during PNC for the first time,aug'15	Number
		B+pncsep15	Number of HIV positive pregnant women who received ART to reduce the risk of mother to child transmission during PNC for the first time,sep'15	Number
		B+pncoct15	Number of HIV positive pregnant women who received ART to reduce the risk of mother to child transmission during PNC for the first time,oct'15	Number
		B+pncnov15	Number of HIV positive pregnant women who received ART to reduce the risk of mother to child transmission during PNC for the first time,nov'15	Number
		B+pncdec15	Number of HIV positive pregnant women who received ART to reduce the risk of mother to child transmission during PNC for the first time,dec'15	Number
		B+pncjan16	Number of HIV positive pregnant women who received ART to reduce the risk of mother to child transmission during PNC for the first time,jan'16	Number
		B+pncfeb16	Number of HIV positive pregnant women who received ART to reduce the risk of mother to child transmission during PNC for the first time,feb'16	Number
		B+pncmar16	Number of HIV positive pregnant women who received ART to reduce the risk of mother to child transmission during PNC for the first time,mar'16	Number
		B+pncapr16	Number of HIV positive pregnant women who received ART to reduce the risk of mother to child transmission during PNC for the first time,apr'16	Number
		B+pncmay16	Number of HIV positive pregnant women who received ART to reduce the risk of mother to child transmission during PNC for the first time,may'16	Number
		B+pncjun16	Number of HIV positive pregnant women who received ART to reduce the risk of mother to child transmission during PNC for the first time,jun'16	Number
		B+pncjul16	Number of HIV positive pregnant women who received ART to reduce the risk of mother to child transmission during PNC for the first time,jul'16	Number
		B+pncaug16	Number of HIV positive pregnant women who received ART to reduce the risk of mother to child transmission during PNC for the first time,aug'16	Number
		pabjul15	Number of Infants whose mothers had protective doses of TT against NNT (PAB) (H/HC 1.3.9.1),Jul'15	Number
		pabaug15	Number of Infants whose mothers had protective doses of TT against NNT (PAB) (H/HC 1.3.9.1),aug'15	Number
		pabsep15	Number of Infants whose mothers had protective doses of TT against NNT (PAB) (H/HC 1.3.9.1),sep'15	Number
		paboct15	Number of Infants whose mothers had protective doses of TT against NNT (PAB) (H/HC 1.3.9.1),oct'15	Number
		pabnov15	Number of Infants whose mothers had protective doses of TT against NNT (PAB) (H/HC 1.3.9.1),nov'15	Number
		pabdec15	Number of Infants whose mothers had protective doses of TT against NNT (PAB) (H/HC 1.3.9.1),dec'15	Number
		pabjan16	Number of Infants whose mothers had protective doses of TT against NNT (PAB) (H/HC 1.3.9.1),jan'16	Number
		pabfeb16	Number of Infants whose mothers had protective doses of TT against NNT (PAB) (H/HC 1.3.9.1),feb'16	Number
		pabmar16	Number of Infants whose mothers had protective doses of TT against NNT (PAB) (H/HC 1.3.9.1),mar'16	Number
		pabapr16	Number of Infants whose mothers had protective doses of TT against NNT (PAB) (H/HC 1.3.9.1),apr'16	Number
		pabmay16	Number of Infants whose mothers had protective doses of TT against NNT (PAB) (H/HC 1.3.9.1),may'16	Number
		pabjun16	Number of Infants whose mothers had protective doses of TT against NNT (PAB) (H/HC 1.3.9.1),jun'16	Number
		pabjul16	Number of Infants whose mothers had protective doses of TT against NNT (PAB) (H/HC 1.3.9.1),jul'16	Number
		pabaug16	Number of Infants whose mothers had protective doses of TT against NNT (PAB) (H/HC 1.3.9.1),aug'16	Number
	Delivery register review-complications	pjul15	# of pregnant women admitted to a health facility with pre-eclampsia or eclampsia,Jul'15	Number
		paug15	# of pregnant women admitted to a health facility with pre-eclampsia or eclampsia,aug'15	Number
		psep15	# of pregnant women admitted to a health facility with pre-eclampsia or eclampsia,sep'15	Number
		poct15	# of pregnant women admitted to a health facility with pre-eclampsia or eclampsia,oct'15	Number
		pnov15	# of pregnant women admitted to a health facility with pre-eclampsia or eclampsia,nov'15	Number
		pdec15	# of pregnant women admitted to a health facility with pre-eclampsia or eclampsia,dec'15	Number
		pjan16	# of pregnant women admitted to a health facility with pre-eclampsia or eclampsia,jan'16	Number
		pfeb16	# of pregnant women admitted to a health facility with pre-eclampsia or eclampsia,feb'16	Number
		pmar16	# of pregnant women admitted to a health facility with pre-eclampsia or eclampsia,mar'16	Number
		papr16	# of pregnant women admitted to a health facility with pre-eclampsia or eclampsia,apr'16	Number
		pmay16	# of pregnant women admitted to a health facility with pre-eclampsia or eclampsia,may'16	Number
		pjun16	# of pregnant women admitted to a health facility with pre-eclampsia or eclampsia,jun'16	Number
		pjul16	# of pregnant women admitted to a health facility with pre-eclampsia or eclampsia,jul'16	Number
		paug16	# of pregnant women admitted to a health facility with pre-eclampsia or eclampsia,aug'16	Number
		ppjul15	# of pregnant women admitted to a health facility with pPRoM,Jul'15	Number
		ppaug15	# of pregnant women admitted to a health facility with pPRoM,aug'15	Number
		ppsepp15	# of pregnant women admitted to a health facility with pPRoM,sep'15	Number
		ppoct15	# of pregnant women admitted to a health facility with pPRoM,oct'15	Number
		ppnov15	# of pregnant women admitted to a health facility with pPRoM,nov'15	Number
		ppdec15	# of pregnant women admitted to a health facility with pPRoM,dec'15	Number
		ppjan16	# of pregnant women admitted to a health facility with pPRoM,jan'16	Number
		ppfeb16	# of pregnant women admitted to a health facility with pPRoM,feb'16	Number
		ppmar16	# of pregnant women admitted to a health facility with pPRoM,mar'16	Number
		ppappr16	# of pregnant women admitted to a health facility with pPRoM,apr'16	Number
		ppmay16	# of pregnant women admitted to a health facility with pPRoM,may'16	Number
		ppjun16	# of pregnant women admitted to a health facility with pPRoM,jun'16	Number
		ppjul16	# of pregnant women admitted to a health facility with pPRoM,jul'16	Number
		ppaug16	# of pregnant women admitted to a health facility with pPRoM,aug'16	Number
		pphjul15	Number of Postpartum Hemorrhage cases,Jul'15	Number
		pphaug15	Number of Postpartum Hemorrhage cases,aug'15	Number
		pphsepph15	Number of Postpartum Hemorrhage cases,sep'15	Number
		pphoct15	Number of Postpartum Hemorrhage cases,oct'15	Number
		pphnov15	Number of Postpartum Hemorrhage cases,nov'15	Number
		pphdec15	Number of Postpartum Hemorrhage cases,dec'15	Number
		pphjan16	Number of Postpartum Hemorrhage cases,jan'16	Number
		pphfeb16	Number of Postpartum Hemorrhage cases,feb'16	Number
		pphmar16	Number of Postpartum Hemorrhage cases,mar'16	Number
		pphapphr16	Number of Postpartum Hemorrhage cases,apr'16	Number
		pphmay16	Number of Postpartum Hemorrhage cases,may'16	Number
		pphjun16	Number of Postpartum Hemorrhage cases,jun'16	Number
		pphjul16	Number of Postpartum Hemorrhage cases,jul'16	Number
		pphaug16	Number of Postpartum Hemorrhage cases,aug'16	Number
		atjul15	Number of neonates with perinatal asphyxia treated with oxygen/resuscitation,Jul'15	Number
		ataug15	Number of neonates with perinatal asphyxia treated with oxygen/resuscitation,aug'15	Number
		atseat15	Number of neonates with perinatal asphyxia treated with oxygen/resuscitation,sep'15	Number
		atoct15	Number of neonates with perinatal asphyxia treated with oxygen/resuscitation,oct'15	Number
		atnov15	Number of neonates with perinatal asphyxia treated with oxygen/resuscitation,nov'15	Number
		atdec15	Number of neonates with perinatal asphyxia treated with oxygen/resuscitation,dec'15	Number
		atjan16	Number of neonates with perinatal asphyxia treated with oxygen/resuscitation,jan'16	Number
		atfeb16	Number of neonates with perinatal asphyxia treated with oxygen/resuscitation,feb'16	Number
		atmar16	Number of neonates with perinatal asphyxia treated with oxygen/resuscitation,mar'16	Number
		ataatr16	Number of neonates with perinatal asphyxia treated with oxygen/resuscitation,apr'16	Number
		atmay16	Number of neonates with perinatal asphyxia treated with oxygen/resuscitation,may'16	Number
		atjun16	Number of neonates with perinatal asphyxia treated with oxygen/resuscitation,jun'16	Number
		atjul16	Number of neonates with perinatal asphyxia treated with oxygen/resuscitation,jul'16	Number
		ataug16	Number of neonates with perinatal asphyxia treated with oxygen/resuscitation,aug'16	Number
		pajul15	Number of neonates with perinatal asphyxia,Jul'15	Number
		paaug15	Number of neonates with perinatal asphyxia,aug'15	Number
		pasepa15	Number of neonates with perinatal asphyxia,sep'15	Number
		paoct15	Number of neonates with perinatal asphyxia,oct'15	Number
		panov15	Number of neonates with perinatal asphyxia,nov'15	Number
		padec15	Number of neonates with perinatal asphyxia,dec'15	Number
		pajan16	Number of neonates with perinatal asphyxia,jan'16	Number
		pafeb16	Number of neonates with perinatal asphyxia,feb'16	Number
		pamar16	Number of neonates with perinatal asphyxia,mar'16	Number
		paapar16	Number of neonates with perinatal asphyxia,apr'16	Number
		pamay16	Number of neonates with perinatal asphyxia,may'16	Number
		pajun16	Number of neonates with perinatal asphyxia,jun'16	Number
		pajul16	Number of neonates with perinatal asphyxia,jul'16	Number
		paaug16	Number of neonates with perinatal asphyxia,aug'16	Number
		stjul15	Number of neonates treated for sepsis with antibiotics,Jul'15	Number
		staug15	Number of neonates treated for sepsis with antibiotics,aug'15	Number
		stsest15	Number of neonates treated for sepsis with antibiotics,sep'15	Number
		stoct15	Number of neonates treated for sepsis with antibiotics,oct'15	Number
		stnov15	Number of neonates treated for sepsis with antibiotics,nov'15	Number
		stdec15	Number of neonates treated for sepsis with antibiotics,dec'15	Number
		stjan16	Number of neonates treated for sepsis with antibiotics,jan'16	Number
		stfeb16	Number of neonates treated for sepsis with antibiotics,feb'16	Number
		stmar16	Number of neonates treated for sepsis with antibiotics,mar'16	Number
		stastr16	Number of neonates treated for sepsis with antibiotics,apr'16	Number
		stmay16	Number of neonates treated for sepsis with antibiotics,may'16	Number
		stjun16	Number of neonates treated for sepsis with antibiotics,jun'16	Number
		stjul16	Number of neonates treated for sepsis with antibiotics,jul'16	Number
		staug16	Number of neonates treated for sepsis with antibiotics,aug'16	Number
		nsjul15	Number of neonates with sepsis ,Jul'15	Number
		nsaug15	Number of neonates with sepsis ,aug'15	Number
		nssens15	Number of neonates with sepsis ,sep'15	Number
		nsoct15	Number of neonates with sepsis ,oct'15	Number
		nsnov15	Number of neonates with sepsis ,nov'15	Number
		nmpmec15	Number of neonates with sepsis ,dec'15	Number
		nsjan16	Number of neonates with sepsis ,jan'16	Number
		nsfeb16	Number of neonates with sepsis ,feb'16	Number
		nsmar16	Number of neonates with sepsis ,mar'16	Number
		nsansr16	Number of neonates with sepsis ,apr'16	Number
		nsmay16	Number of neonates with sepsis ,may'16	Number
		nsjun16	Number of neonates with sepsis ,jun'16	Number
		nsjul16	Number of neonates with sepsis ,jul'16	Number
		nsaug16	Number of neonates with sepsis ,aug'16	Number
		kmcjul15	Number of newborns born <2500g and initiated KMC in the facility,Jul'15	Number
		kmcaug15	Number of newborns born <2500g and initiated KMC in the facility,aug'15	Number
		kmcsekmc15	Number of newborns born <2500g and initiated KMC in the facility,sep'15	Number
		kmcoct15	Number of newborns born <2500g and initiated KMC in the facility,oct'15	Number
		kmcnov15	Number of newborns born <2500g and initiated KMC in the facility,nov'15	Number
		kmcdec15	Number of newborns born <2500g and initiated KMC in the facility,dec'15	Number
		kmcjan16	Number of newborns born <2500g and initiated KMC in the facility,jan'16	Number
		kmcfeb16	Number of newborns born <2500g and initiated KMC in the facility,feb'16	Number
		kmcmar16	Number of newborns born <2500g and initiated KMC in the facility,mar'16	Number
		kmcakmcr16	Number of newborns born <2500g and initiated KMC in the facility,apr'16	Number
		kmcmay16	Number of newborns born <2500g and initiated KMC in the facility,may'16	Number
		kmcjun16	Number of newborns born <2500g and initiated KMC in the facility,jun'16	Number
		kmcjul16	Number of newborns born <2500g and initiated KMC in the facility,jul'16	Number
		kmcaug16	Number of newborns born <2500g and initiated KMC in the facility,aug'16	Number
	Medical Record Review - Complications	ptjul15	# of pregnant women admitted to a health facility with pre-eclampsia or eclampsia who are treated with IV/IM MgSO4, per protocol ,Jul'15	Number
		ptaug15	# of pregnant women admitted to a health facility with pre-eclampsia or eclampsia who are treated with IV/IM MgSO4, per protocol ,aug'15	Number
		ptsept15	# of pregnant women admitted to a health facility with pre-eclampsia or eclampsia who are treated with IV/IM MgSO4, per protocol ,sep'15	Number
		ptoct15	# of pregnant women admitted to a health facility with pre-eclampsia or eclampsia who are treated with IV/IM MgSO4, per protocol ,oct'15	Number
		ptnov15	# of pregnant women admitted to a health facility with pre-eclampsia or eclampsia who are treated with IV/IM MgSO4, per protocol ,nov'15	Number
		ptdec15	# of pregnant women admitted to a health facility with pre-eclampsia or eclampsia who are treated with IV/IM MgSO4, per protocol ,dec'15	Number
		ptjan16	# of pregnant women admitted to a health facility with pre-eclampsia or eclampsia who are treated with IV/IM MgSO4, per protocol ,jan'16	Number
		ptfeb16	# of pregnant women admitted to a health facility with pre-eclampsia or eclampsia who are treated with IV/IM MgSO4, per protocol ,feb'16	Number
		ptmar16	# of pregnant women admitted to a health facility with pre-eclampsia or eclampsia who are treated with IV/IM MgSO4, per protocol ,mar'16	Number
		ptaptr16	# of pregnant women admitted to a health facility with pre-eclampsia or eclampsia who are treated with IV/IM MgSO4, per protocol ,apr'16	Number
		ptmay16	# of pregnant women admitted to a health facility with pre-eclampsia or eclampsia who are treated with IV/IM MgSO4, per protocol ,may'16	Number
		ptjun16	# of pregnant women admitted to a health facility with pre-eclampsia or eclampsia who are treated with IV/IM MgSO4, per protocol ,jun'16	Number
		ptjul16	# of pregnant women admitted to a health facility with pre-eclampsia or eclampsia who are treated with IV/IM MgSO4, per protocol ,jul'16	Number
		ptaug16	# of pregnant women admitted to a health facility with pre-eclampsia or eclampsia who are treated with IV/IM MgSO4, per protocol ,aug'16	Number
		pptjul15	# of pregnant women admitted to a health facility with pPRoM and treated with erythromycin or ampicillin, per protocol ,Jul'15	Number
		pptaug15	# of pregnant women admitted to a health facility with pPRoM and treated with erythromycin or ampicillin, per protocol ,aug'15	Number
		pptseppt15	# of pregnant women admitted to a health facility with pPRoM and treated with erythromycin or ampicillin, per protocol ,sep'15	Number
		pptoct15	# of pregnant women admitted to a health facility with pPRoM and treated with erythromycin or ampicillin, per protocol ,oct'15	Number
		pptnov15	# of pregnant women admitted to a health facility with pPRoM and treated with erythromycin or ampicillin, per protocol ,nov'15	Number
		pptdec15	# of pregnant women admitted to a health facility with pPRoM and treated with erythromycin or ampicillin, per protocol ,dec'15	Number
		pptjan16	# of pregnant women admitted to a health facility with pPRoM and treated with erythromycin or ampicillin, per protocol ,jan'16	Number
		pptfeb16	# of pregnant women admitted to a health facility with pPRoM and treated with erythromycin or ampicillin, per protocol ,feb'16	Number
		pptmar16	# of pregnant women admitted to a health facility with pPRoM and treated with erythromycin or ampicillin, per protocol ,mar'16	Number
		pptapptr16	# of pregnant women admitted to a health facility with pPRoM and treated with erythromycin or ampicillin, per protocol ,apr'16	Number
		pptmay16	# of pregnant women admitted to a health facility with pPRoM and treated with erythromycin or ampicillin, per protocol ,may'16	Number
		pptjun16	# of pregnant women admitted to a health facility with pPRoM and treated with erythromycin or ampicillin, per protocol ,jun'16	Number
		pptjul16	# of pregnant women admitted to a health facility with pPRoM and treated with erythromycin or ampicillin, per protocol ,jul'16	Number
		pptaug16	# of pregnant women admitted to a health facility with pPRoM and treated with erythromycin or ampicillin, per protocol ,aug'16	Number
		htjul15	Number of Postpartum Hemorrhage cases managed per protocol ,Jul'15	Number
		htaug15	Number of Postpartum Hemorrhage cases managed per protocol ,aug'15	Number
		htseht15	Number of Postpartum Hemorrhage cases managed per protocol ,sep'15	Number
		htoct15	Number of Postpartum Hemorrhage cases managed per protocol ,oct'15	Number
		htnov15	Number of Postpartum Hemorrhage cases managed per protocol ,nov'15	Number
		htdec15	Number of Postpartum Hemorrhage cases managed per protocol ,dec'15	Number
		htjan16	Number of Postpartum Hemorrhage cases managed per protocol ,jan'16	Number
		htfeb16	Number of Postpartum Hemorrhage cases managed per protocol ,feb'16	Number
		htmar16	Number of Postpartum Hemorrhage cases managed per protocol ,mar'16	Number
		htahtr16	Number of Postpartum Hemorrhage cases managed per protocol ,apr'16	Number
		htmay16	Number of Postpartum Hemorrhage cases managed per protocol ,may'16	Number
		htjun16	Number of Postpartum Hemorrhage cases managed per protocol ,jun'16	Number
		htjul16	Number of Postpartum Hemorrhage cases managed per protocol ,jul'16	Number
		htaug16	Number of Postpartum Hemorrhage cases managed per protocol ,aug'16	Number
	Archived Annual Plan	edjul15	Total number of expected deliveries ,Jul'15	Number
		edaug15	Total number of expected deliveries ,aug'15	Number
		edseed15	Total number of expected deliveries ,sep'15	Number
		edoct15	Total number of expected deliveries ,oct'15	Number
		ednov15	Total number of expected deliveries ,nov'15	Number
		eddec15	Total number of expected deliveries ,dec'15	Number
		edjan16	Total number of expected deliveries ,jan'16	Number
		edfeb16	Total number of expected deliveries ,feb'16	Number
		edmar16	Total number of expected deliveries ,mar'16	Number
		edaedr16	Total number of expected deliveries ,apr'16	Number
		edmay16	Total number of expected deliveries ,may'16	Number
		edjun16	Total number of expected deliveries ,jun'16	Number
		edjul16	Total number of expected deliveries ,jul'16	Number
		edaug16	Total number of expected deliveries ,aug'16	Number
		epjul15	Number of expected pregnancies ,Jul'15	Number
		epaug15	Number of expected pregnancies ,aug'15	Number
		epseep15	Number of expected pregnancies ,sep'15	Number
		epoct15	Number of expected pregnancies ,oct'15	Number
		epnov15	Number of expected pregnancies ,nov'15	Number
		epdec15	Number of expected pregnancies ,dec'15	Number
		epjan16	Number of expected pregnancies ,jan'16	Number
		epfeb16	Number of expected pregnancies ,feb'16	Number
		epmar16	Number of expected pregnancies ,mar'16	Number
		epaepr16	Number of expected pregnancies ,apr'16	Number
		epmay16	Number of expected pregnancies ,may'16	Number
		epjun16	Number of expected pregnancies ,jun'16	Number
		epjul16	Number of expected pregnancies ,jul'16	Number
		epaug16	Number of expected pregnancies ,aug'16	Number
	Medical Record Review – Bundle	bpm1m1	BP measured on admission MRN1 month1	Number	0=not documented,1=documented,3=no space for documenting
		bpm2m1	BP measured on admission MRN2 month1	Number	0=not documented,1=documented,3=no space for documenting
		bpm3m1	BP measured on admission MRN3 month1	Number	0=not documented,1=documented,3=no space for documenting
		bpm4m1	BP measured on admission MRN4 month1	Number	0=not documented,1=documented,3=no space for documenting
		bpm5m1	BP measured on admission MRN5 month1	Number	0=not documented,1=documented,3=no space for documenting
		bpm6m1	BP measured on admission MRN6 month1	Number	0=not documented,1=documented,3=no space for documenting
		bpm7m1	BP measured on admission MRN7 month1	Number	0=not documented,1=documented,3=no space for documenting
		bpm8m1	BP measured on admission MRN8 month1	Number	0=not documented,1=documented,3=no space for documenting
		bpm9m1	BP measured on admission MRN9 month1	Number	0=not documented,1=documented,3=no space for documenting
		bpm10m1	BP measured on admission MRN10 month1	Number	0=not documented,1=documented,3=no space for documenting
		bptm1	BP measured on admission total month1	Number
		pm1m1	Partograph started when cervical dilatation at least 4cm MRN1 month1	Number	0=not documented,1=documented,3=no space for documenting
		pm2m1	Partograph started when cervical dilatation at least 4cm MRN2 month1	Number	0=not documented,1=documented,3=no space for documenting
		pm3m1	Partograph started when cervical dilatation at least 4cm MRN3 month1	Number	0=not documented,1=documented,3=no space for documenting
		pm4m1	Partograph started when cervical dilatation at least 4cm MRN4 month1	Number	0=not documented,1=documented,3=no space for documenting
		pm5m1	Partograph started when cervical dilatation at least 4cm MRN5 month1	Number	0=not documented,1=documented,3=no space for documenting
		pm6m1	Partograph started when cervical dilatation at least 4cm MRN6 month1	Number	0=not documented,1=documented,3=no space for documenting
		pm7m1	Partograph started when cervical dilatation at least 4cm MRN7 month1	Number	0=not documented,1=documented,3=no space for documenting
		pm8m1	Partograph started when cervical dilatation at least 4cm MRN8 month1	Number	0=not documented,1=documented,3=no space for documenting
		pm9m1	Partograph started when cervical dilatation at least 4cm MRN9 month1	Number	0=not documented,1=documented,3=no space for documenting
		pm10m1	Partograph started when cervical dilatation at least 4cm MRN10 month1	Number	0=not documented,1=documented,3=no space for documenting
		ptm1	Partograph started when cervical dilatation at least 4cm total month1	Number
		swgm1m1	Availability of soap,water,alcohol hand rub&gloves MRN1 month1	Number	0=not documented,1=documented,3=no space for documenting
		swgm2m1	Availability of soap,water,alcohol hand rub&gloves MRN2 month1	Number	0=not documented,1=documented,3=no space for documenting
		swgm3m1	Availability of soap,water,alcohol hand rub&gloves MRN3 month1	Number	0=not documented,1=documented,3=no space for documenting
		swgm4m1	Availability of soap,water,alcohol hand rub&gloves MRN4 month1	Number	0=not documented,1=documented,3=no space for documenting
		swgm5m1	Availability of soap,water,alcohol hand rub&gloves MRN5 month1	Number	0=not documented,1=documented,3=no space for documenting
		swgm6m1	Availability of soap,water,alcohol hand rub&gloves MRN6 month1	Number	0=not documented,1=documented,3=no space for documenting
		swgm7m1	Availability of soap,water,alcohol hand rub&gloves MRN7 month1	Number	0=not documented,1=documented,3=no space for documenting
		swgm8m1	Availability of soap,water,alcohol hand rub&gloves MRN8 month1	Number	0=not documented,1=documented,3=no space for documenting
		swgm9m1	Availability of soap,water,alcohol hand rub&gloves MRN9 month1	Number	0=not documented,1=documented,3=no space for documenting
		swgm10m1	Availability of soap,water,alcohol hand rub&gloves MRN10 month1	Number	0=not documented,1=documented,3=no space for documenting
		swgtm1	Availability of soap,water,alcohol hand rub&gloves total month1	Number
		bcpm1m1	Birth companion encouraged to be present during labor & birth MRN1 month1	Number	0=not documented,1=documented,3=no space for documenting
		bcpm2m1	Birth companion encouraged to be present during labor & birth MRN2 month1	Number	0=not documented,1=documented,3=no space for documenting
		bcpm3m1	Birth companion encouraged to be present during labor & birth MRN3 month1	Number	0=not documented,1=documented,3=no space for documenting
		bcpm4m1	Birth companion encouraged to be present during labor & birth MRN4 month1	Number	0=not documented,1=documented,3=no space for documenting
		bcpm5m1	Birth companion encouraged to be present during labor & birth MRN5 month1	Number	0=not documented,1=documented,3=no space for documenting
		bcpm6m1	Birth companion encouraged to be present during labor & birth MRN6 month1	Number	0=not documented,1=documented,3=no space for documenting
		bcpm7m1	Birth companion encouraged to be present during labor & birth MRN7 month1	Number	0=not documented,1=documented,3=no space for documenting
		bcpm8m1	Birth companion encouraged to be present during labor & birth MRN8 month1	Number	0=not documented,1=documented,3=no space for documenting
		bcpm9m1	Birth companion encouraged to be present during labor & birth MRN9 month1	Number	0=not documented,1=documented,3=no space for documenting
		bcpm10m1	Birth companion encouraged to be present during labor & birth MRN10 month1	Number	0=not documented,1=documented,3=no space for documenting
		bcptm1	Birth companion encouraged to be present during labor & birth total month1	Number
		mpm1m1	mothers privacy maintained during labor and delivery MRN1 month1	Number	0=not documented,1=documented,3=no space for documenting
		mpm2m1	mothers privacy maintained during labor and delivery MRN2 month1	Number	0=not documented,1=documented,3=no space for documenting
		mpm3m1	mothers privacy maintained during labor and delivery MRN3 month1	Number	0=not documented,1=documented,3=no space for documenting
		mpm4m1	mothers privacy maintained during labor and delivery MRN4 month1	Number	0=not documented,1=documented,3=no space for documenting
		mpm5m1	mothers privacy maintained during labor and delivery MRN5 month1	Number	0=not documented,1=documented,3=no space for documenting
		mpm6m1	mothers privacy maintained during labor and delivery MRN6 month1	Number	0=not documented,1=documented,3=no space for documenting
		mpm7m1	mothers privacy maintained during labor and delivery MRN7 month1	Number	0=not documented,1=documented,3=no space for documenting
		mpm8m1	mothers privacy maintained during labor and delivery MRN8 month1	Number	0=not documented,1=documented,3=no space for documenting
		mpm9m1	mothers privacy maintained during labor and delivery MRN9 month1	Number	0=not documented,1=documented,3=no space for documenting
		mpm10m1	mothers privacy maintained during labor and delivery MRN10 month1	Number	0=not documented,1=documented,3=no space for documenting
		mpmtm1	mothers privacy maintained during labor and delivery total month1	Number
		a_gswm1m1	Availability of gloves,soap/savlon&clean water MRN1 month1	Number	0=not documented,1=documented,3=no space for documenting
		a_gswm2m1	Availability of gloves,soap/savlon&clean water MRN2 month1	Number	0=not documented,1=documented,3=no space for documenting
		a_gswm3m1	Availability of gloves,soap/savlon&clean water MRN3 month1	Number	0=not documented,1=documented,3=no space for documenting
		a_gswm4m1	Availability of gloves,soap/savlon&clean water MRN4 month1	Number	0=not documented,1=documented,3=no space for documenting
		a_gswm5m1	Availability of gloves,soap/savlon&clean water MRN5 month1	Number	0=not documented,1=documented,3=no space for documenting
		a_gswm6m1	Availability of gloves,soap/savlon&clean water MRN6 month1	Number	0=not documented,1=documented,3=no space for documenting
		a_gswm7m1	Availability of gloves,soap/savlon&clean water MRN7 month1	Number	0=not documented,1=documented,3=no space for documenting
		a_gswm8m1	Availability of gloves,soap/savlon&clean water MRN8 month1	Number	0=not documented,1=documented,3=no space for documenting
		a_gswm9m1	Availability of gloves,soap/savlon&clean water MRN9 month1	Number	0=not documented,1=documented,3=no space for documenting
		a_gswm10m1	Availability of gloves,soap/savlon&clean water MRN10 month1	Number	0=not documented,1=documented,3=no space for documenting
		a_gswtm1	Availability of gloves,soap/savlon&clean water total month1	Number
		pusm1m1	Preparation of 10 IU IV/IM uterotonic syringeMRN1 month1	Number	0=not documented,1=documented,3=no space for documenting
		pusm2m1	Preparation of 10 IU IV/IM uterotonic syringeMRN2 month1	Number	0=not documented,1=documented,3=no space for documenting
		pusm3m1	Preparation of 10 IU IV/IM uterotonic syringeMRN3 month1	Number	0=not documented,1=documented,3=no space for documenting
		pusm4m1	Preparation of 10 IU IV/IM uterotonic syringeMRN4 month1	Number	0=not documented,1=documented,3=no space for documenting
		pusm5m1	Preparation of 10 IU IV/IM uterotonic syringeMRN5 month1	Number	0=not documented,1=documented,3=no space for documenting
		pusm6m1	Preparation of 10 IU IV/IM uterotonic syringeMRN6 month1	Number	0=not documented,1=documented,3=no space for documenting
		pusm7m1	Preparation of 10 IU IV/IM uterotonic syringeMRN7 month1	Number	0=not documented,1=documented,3=no space for documenting
		pusm8m1	Preparation of 10 IU IV/IM uterotonic syringeMRN8 month1	Number	0=not documented,1=documented,3=no space for documenting
		pusm9m1	Preparation of 10 IU IV/IM uterotonic syringeMRN9 month1	Number	0=not documented,1=documented,3=no space for documenting
		pusm10m1	Preparation of 10 IU IV/IM uterotonic syringeMRN10 month1	Number	0=not documented,1=documented,3=no space for documenting
		pustm1	Preparation of 10 IU IV/IM uterotonic syringetotal month1	Number
		a_tsm1m1	Availability of two clean,dry,warm towels&suction device MRN1 month1	Number	0=not documented,1=documented,3=no space for documenting
		a_tsm2m1	Availability of two clean,dry,warm towels&suction device MRN2 month1	Number	0=not documented,1=documented,3=no space for documenting
		a_tsm3m1	Availability of two clean,dry,warm towels&suction device MRN3 month1	Number	0=not documented,1=documented,3=no space for documenting
		a_tsm4m1	Availability of two clean,dry,warm towels&suction device MRN4 month1	Number	0=not documented,1=documented,3=no space for documenting
		a_tsm5m1	Availability of two clean,dry,warm towels&suction device MRN5 month1	Number	0=not documented,1=documented,3=no space for documenting
		a_tsm6m1	Availability of two clean,dry,warm towels&suction device MRN6 month1	Number	0=not documented,1=documented,3=no space for documenting
		a_tsm7m1	Availability of two clean,dry,warm towels&suction device MRN7 month1	Number	0=not documented,1=documented,3=no space for documenting
		a_tsm8m1	Availability of two clean,dry,warm towels&suction device MRN8 month1	Number	0=not documented,1=documented,3=no space for documenting
		a_tsm9m1	Availability of two clean,dry,warm towels&suction device MRN9 month1	Number	0=not documented,1=documented,3=no space for documenting
		a_tsm10m1	Availability of two clean,dry,warm towels&suction device MRN10 month1	Number	0=not documented,1=documented,3=no space for documenting
		a_tstm1	Availability of two clean,dry,warm towels&suction device total month1	Number
		a_bmm1m1	Availability of bag and mask (size 0 and 1) MRN1 month1	Number	0=not documented,1=documented,3=no space for documenting
		a_bmm2m1	Availability of bag and mask (size 0 and 1) MRN2 month1	Number	0=not documented,1=documented,3=no space for documenting
		a_bmm3m1	Availability of bag and mask (size 0 and 1) MRN3 month1	Number	0=not documented,1=documented,3=no space for documenting
		a_bmm4m1	Availability of bag and mask (size 0 and 1) MRN4 month1	Number	0=not documented,1=documented,3=no space for documenting
		a_bmm5m1	Availability of bag and mask (size 0 and 1) MRN5 month1	Number	0=not documented,1=documented,3=no space for documenting
		a_bmm6m1	Availability of bag and mask (size 0 and 1) MRN6 month1	Number	0=not documented,1=documented,3=no space for documenting
		a_bmm7m1	Availability of bag and mask (size 0 and 1) MRN7 month1	Number	0=not documented,1=documented,3=no space for documenting
		a_bmm8m1	Availability of bag and mask (size 0 and 1) MRN8 month1	Number	0=not documented,1=documented,3=no space for documenting
		a_bmm9m1	Availability of bag and mask (size 0 and 1) MRN9 month1	Number	0=not documented,1=documented,3=no space for documenting
		a_bmm10m1	Availability of bag and mask (size 0 and 1) MRN10 month1	Number	0=not documented,1=documented,3=no space for documenting
		a_bmtm1	Availability of bag and mask (size 0 and 1) total month1	Number
		hirm1m1	Helper/Assistant identified and informed for resuscitation MRN1 month1	Number	0=not documented,1=documented,3=no space for documenting
		hirm2m1	Helper/Assistant identified and informed for resuscitation MRN2 month1	Number	0=not documented,1=documented,3=no space for documenting
		hirm3m1	Helper/Assistant identified and informed for resuscitation MRN3 month1	Number	0=not documented,1=documented,3=no space for documenting
		hirm4m1	Helper/Assistant identified and informed for resuscitation MRN4 month1	Number	0=not documented,1=documented,3=no space for documenting
		hirm5m1	Helper/Assistant identified and informed for resuscitation MRN5 month1	Number	0=not documented,1=documented,3=no space for documenting
		hirm6m1	Helper/Assistant identified and informed for resuscitation MRN6 month1	Number	0=not documented,1=documented,3=no space for documenting
		hirm7m1	Helper/Assistant identified and informed for resuscitation MRN7 month1	Number	0=not documented,1=documented,3=no space for documenting
		hirm8m1	Helper/Assistant identified and informed for resuscitation MRN8 month1	Number	0=not documented,1=documented,3=no space for documenting
		hirm9m1	Helper/Assistant identified and informed for resuscitation MRN9 month1	Number	0=not documented,1=documented,3=no space for documenting
		hirm10m1	Helper/Assistant identified and informed for resuscitation MRN10 month1	Number	0=not documented,1=documented,3=no space for documenting
		hirtm1	Helper/Assistant identified and informed for resuscitation total month1	Number
		nam1m1	Newborn assessment MRN1 month1	Number	0=not documented,1=documented,3=no space for documenting
		nam2m1	Newborn assessment MRN2 month1	Number	0=not documented,1=documented,3=no space for documenting
		nam3m1	Newborn assessment MRN3 month1	Number	0=not documented,1=documented,3=no space for documenting
		nam4m1	Newborn assessment MRN4 month1	Number	0=not documented,1=documented,3=no space for documenting
		nam5m1	Newborn assessment MRN5 month1	Number	0=not documented,1=documented,3=no space for documenting
		nam6m1	Newborn assessment MRN6 month1	Number	0=not documented,1=documented,3=no space for documenting
		nam7m1	Newborn assessment MRN7 month1	Number	0=not documented,1=documented,3=no space for documenting
		nam8m1	Newborn assessment MRN8 month1	Number	0=not documented,1=documented,3=no space for documenting
		nam9m1	Newborn assessment MRN9 month1	Number	0=not documented,1=documented,3=no space for documenting
		nam10m1	Newborn assessment MRN10 month1	Number	0=not documented,1=documented,3=no space for documenting
		natm1	Newborn assessment total month1	Number
		sks_bm1m1	Immediate skin to skin and initiate breastfeeding within the 1st hour (measured by mother/baby bonding)MRN1 month1	Number	0=not documented,1=documented,3=no space for documenting
		sks_bm2m1	Immediate skin to skin and initiate breastfeeding within the 1st hour (measured by mother/baby bonding)MRN2 month1	Number	0=not documented,1=documented,3=no space for documenting
		sks_bm3m1	Immediate skin to skin and initiate breastfeeding within the 1st hour (measured by mother/baby bonding)MRN3 month1	Number	0=not documented,1=documented,3=no space for documenting
		sks_bm4m1	Immediate skin to skin and initiate breastfeeding within the 1st hour (measured by mother/baby bonding)MRN4 month1	Number	0=not documented,1=documented,3=no space for documenting
		sks_bm5m1	Immediate skin to skin and initiate breastfeeding within the 1st hour (measured by mother/baby bonding)MRN5 month1	Number	0=not documented,1=documented,3=no space for documenting
		sks_bm6m1	Immediate skin to skin and initiate breastfeeding within the 1st hour (measured by mother/baby bonding)MRN6 month1	Number	0=not documented,1=documented,3=no space for documenting
		sks_bm7m1	Immediate skin to skin and initiate breastfeeding within the 1st hour (measured by mother/baby bonding)MRN7 month1	Number	0=not documented,1=documented,3=no space for documenting
		sks_bm8m1	Immediate skin to skin and initiate breastfeeding within the 1st hour (measured by mother/baby bonding)MRN8 month1	Number	0=not documented,1=documented,3=no space for documenting
		sks_bm9m1	Immediate skin to skin and initiate breastfeeding within the 1st hour (measured by mother/baby bonding)MRN9 month1	Number	0=not documented,1=documented,3=no space for documenting
		sks_bm10m1	Immediate skin to skin and initiate breastfeeding within the 1st hour (measured by mother/baby bonding)MRN10 month1	Number	0=not documented,1=documented,3=no space for documenting
		sks_btm1	Immediate skin to skin and initiate breastfeeding within the 1st hour (measured by mother/baby bonding)total month1	Number
		wrm1m1	Baby weighed and recorded MRN1 month1	Number	0=not documented,1=documented,3=no space for documenting
		wrm2m1	Baby weighed and recorded MRN2 month1	Number	0=not documented,1=documented,3=no space for documenting
		wrm3m1	Baby weighed and recorded MRN3 month1	Number	0=not documented,1=documented,3=no space for documenting
		wrm4m1	Baby weighed and recorded MRN4 month1	Number	0=not documented,1=documented,3=no space for documenting
		wrm5m1	Baby weighed and recorded MRN5 month1	Number	0=not documented,1=documented,3=no space for documenting
		wrm6m1	Baby weighed and recorded MRN6 month1	Number	0=not documented,1=documented,3=no space for documenting
		wrm7m1	Baby weighed and recorded MRN7 month1	Number	0=not documented,1=documented,3=no space for documenting
		wrm8m1	Baby weighed and recorded MRN8 month1	Number	0=not documented,1=documented,3=no space for documenting
		wrm9m1	Baby weighed and recorded MRN9 month1	Number	0=not documented,1=documented,3=no space for documenting
		wrm10m1	Baby weighed and recorded MRN10 month1	Number	0=not documented,1=documented,3=no space for documenting
		wrtm1	Baby weighed and recorded total month1	Number
		vkm1m1	Administer Vit K1 to newborn MRN1 month1	Number	0=not documented,1=documented,3=no space for documenting
		vkm2m1	Administer Vit K1 to newborn MRN2 month1	Number	0=not documented,1=documented,3=no space for documenting
		vkm3m1	Administer Vit K1 to newborn MRN3 month1	Number	0=not documented,1=documented,3=no space for documenting
		vkm4m1	Administer Vit K1 to newborn MRN4 month1	Number	0=not documented,1=documented,3=no space for documenting
		vkm5m1	Administer Vit K1 to newborn MRN5 month1	Number	0=not documented,1=documented,3=no space for documenting
		vkm6m1	Administer Vit K1 to newborn MRN6 month1	Number	0=not documented,1=documented,3=no space for documenting
		vkm7m1	Administer Vit K1 to newborn MRN7 month1	Number	0=not documented,1=documented,3=no space for documenting
		vkm8m1	Administer Vit K1 to newborn MRN8 month1	Number	0=not documented,1=documented,3=no space for documenting
		vkm9m1	Administer Vit K1 to newborn MRN9 month1	Number	0=not documented,1=documented,3=no space for documenting
		vkm10m1	Administer Vit K1 to newborn MRN10 month1	Number	0=not documented,1=documented,3=no space for documenting
		vktm1	Administer Vit K1 to newborn total month1	Number
		ttm1m1	Administer Tetracycline Eye Ointment to newborn MRN1 month1	Number	0=not documented,1=documented,3=no space for documenting
		ttm2m1	Administer Tetracycline Eye Ointment to newborn MRN2 month1	Number	0=not documented,1=documented,3=no space for documenting
		ttm3m1	Administer Tetracycline Eye Ointment to newborn MRN3 month1	Number	0=not documented,1=documented,3=no space for documenting
		ttm4m1	Administer Tetracycline Eye Ointment to newborn MRN4 month1	Number	0=not documented,1=documented,3=no space for documenting
		ttm5m1	Administer Tetracycline Eye Ointment to newborn MRN5 month1	Number	0=not documented,1=documented,3=no space for documenting
		ttm6m1	Administer Tetracycline Eye Ointment to newborn MRN6 month1	Number	0=not documented,1=documented,3=no space for documenting
		ttm7m1	Administer Tetracycline Eye Ointment to newborn MRN7 month1	Number	0=not documented,1=documented,3=no space for documenting
		ttm8m1	Administer Tetracycline Eye Ointment to newborn MRN8 month1	Number	0=not documented,1=documented,3=no space for documenting
		ttm9m1	Administer Tetracycline Eye Ointment to newborn MRN9 month1	Number	0=not documented,1=documented,3=no space for documenting
		ttm10m1	Administer Tetracycline Eye Ointment to newborn MRN10 month1	Number	0=not documented,1=documented,3=no space for documenting
		tttm1	Administer Tetracycline Eye Ointment to newborn total month1	Number
		tm1m1	Total MRN1 month1	Number	0=not documented,1=documented,3=no space for documenting
		tm2m1	Total MRN2 month1	Number	0=not documented,1=documented,3=no space for documenting
		tm3m1	Total MRN3 month1	Number	0=not documented,1=documented,3=no space for documenting
		tm4m1	Total MRN4 month1	Number	0=not documented,1=documented,3=no space for documenting
		tm5m1	Total MRN5 month1	Number	0=not documented,1=documented,3=no space for documenting
		tm6m1	Total MRN6 month1	Number	0=not documented,1=documented,3=no space for documenting
		tm7m1	Total MRN7 month1	Number	0=not documented,1=documented,3=no space for documenting
		tm8m1	Total MRN8 month1	Number	0=not documented,1=documented,3=no space for documenting
		tm9m1	Total MRN9 month1	Number	0=not documented,1=documented,3=no space for documenting
		tm101	Total MRN10 month1	Number	0=not documented,1=documented,3=no space for documenting
		bpm1m2	BP measured on admission MRN1 month2	Number	0=not documented,1=documented,3=no space for documenting
		bpm2m2	BP measured on admission MRN2 month2	Number	0=not documented,1=documented,3=no space for documenting
		bpm3m2	BP measured on admission MRN3 month2	Number	0=not documented,1=documented,3=no space for documenting
		bpm4m2	BP measured on admission MRN4 month2	Number	0=not documented,1=documented,3=no space for documenting
		bpm5m2	BP measured on admission MRN5 month2	Number	0=not documented,1=documented,3=no space for documenting
		bpm6m2	BP measured on admission MRN6 month2	Number	0=not documented,1=documented,3=no space for documenting
		bpm7m2	BP measured on admission MRN7 month2	Number	0=not documented,1=documented,3=no space for documenting
		bpm8m2	BP measured on admission MRN8 month2	Number	0=not documented,1=documented,3=no space for documenting
		bpm9m2	BP measured on admission MRN9 month2	Number	0=not documented,1=documented,3=no space for documenting
		bpm10m2	BP measured on admission MRN10 month2	Number	0=not documented,1=documented,3=no space for documenting
		bptm2	BP measured on admission total month2	Number
		pm1m2	Partograph started when cervical dilatation at least 4cm MRN1 month2	Number	0=not documented,1=documented,3=no space for documenting
		pm2m2	Partograph started when cervical dilatation at least 4cm MRN2 month2	Number	0=not documented,1=documented,3=no space for documenting
		pm3m2	Partograph started when cervical dilatation at least 4cm MRN3 month2	Number	0=not documented,1=documented,3=no space for documenting
		pm4m2	Partograph started when cervical dilatation at least 4cm MRN4 month2	Number	0=not documented,1=documented,3=no space for documenting
		pm5m2	Partograph started when cervical dilatation at least 4cm MRN5 month2	Number	0=not documented,1=documented,3=no space for documenting
		pm6m2	Partograph started when cervical dilatation at least 4cm MRN6 month2	Number	0=not documented,1=documented,3=no space for documenting
		pm7m2	Partograph started when cervical dilatation at least 4cm MRN7 month2	Number	0=not documented,1=documented,3=no space for documenting
		pm8m2	Partograph started when cervical dilatation at least 4cm MRN8 month2	Number	0=not documented,1=documented,3=no space for documenting
		pm9m2	Partograph started when cervical dilatation at least 4cm MRN9 month2	Number	0=not documented,1=documented,3=no space for documenting
		pm10m2	Partograph started when cervical dilatation at least 4cm MRN10 month2	Number	0=not documented,1=documented,3=no space for documenting
		ptm2	Partograph started when cervical dilatation at least 4cm total month2	Number
		swgm1m2	Availability of soap,water,alcohol hand rub&gloves MRN1 month2	Number	0=not documented,1=documented,3=no space for documenting
		swgm2m2	Availability of soap,water,alcohol hand rub&gloves MRN2 month2	Number	0=not documented,1=documented,3=no space for documenting
		swgm3m2	Availability of soap,water,alcohol hand rub&gloves MRN3 month2	Number	0=not documented,1=documented,3=no space for documenting
		swgm4m2	Availability of soap,water,alcohol hand rub&gloves MRN4 month2	Number	0=not documented,1=documented,3=no space for documenting
		swgm5m2	Availability of soap,water,alcohol hand rub&gloves MRN5 month2	Number	0=not documented,1=documented,3=no space for documenting
		swgm6m2	Availability of soap,water,alcohol hand rub&gloves MRN6 month2	Number	0=not documented,1=documented,3=no space for documenting
		swgm7m2	Availability of soap,water,alcohol hand rub&gloves MRN7 month2	Number	0=not documented,1=documented,3=no space for documenting
		swgm8m2	Availability of soap,water,alcohol hand rub&gloves MRN8 month2	Number	0=not documented,1=documented,3=no space for documenting
		swgm9m2	Availability of soap,water,alcohol hand rub&gloves MRN9 month2	Number	0=not documented,1=documented,3=no space for documenting
		swgm10m2	Availability of soap,water,alcohol hand rub&gloves MRN10 month2	Number	0=not documented,1=documented,3=no space for documenting
		swgtm2	Availability of soap,water,alcohol hand rub&gloves total month2	Number
		bcpm1m2	Birth companion encouraged to be present during labor & birth MRN1 month2	Number	0=not documented,1=documented,3=no space for documenting
		bcpm2m2	Birth companion encouraged to be present during labor & birth MRN2 month2	Number	0=not documented,1=documented,3=no space for documenting
		bcpm3m2	Birth companion encouraged to be present during labor & birth MRN3 month2	Number	0=not documented,1=documented,3=no space for documenting
		bcpm4m2	Birth companion encouraged to be present during labor & birth MRN4 month2	Number	0=not documented,1=documented,3=no space for documenting
		bcpm5m2	Birth companion encouraged to be present during labor & birth MRN5 month2	Number	0=not documented,1=documented,3=no space for documenting
		bcpm6m2	Birth companion encouraged to be present during labor & birth MRN6 month2	Number	0=not documented,1=documented,3=no space for documenting
		bcpm7m2	Birth companion encouraged to be present during labor & birth MRN7 month2	Number	0=not documented,1=documented,3=no space for documenting
		bcpm8m2	Birth companion encouraged to be present during labor & birth MRN8 month2	Number	0=not documented,1=documented,3=no space for documenting
		bcpm9m2	Birth companion encouraged to be present during labor & birth MRN9 month2	Number	0=not documented,1=documented,3=no space for documenting
		bcpm10m2	Birth companion encouraged to be present during labor & birth MRN10 month2	Number	0=not documented,1=documented,3=no space for documenting
		bcptm2	Birth companion encouraged to be present during labor & birth total month2	Number
		mpm1m2	mothers privacy maintained during labor and delivery MRN1 month2	Number	0=not documented,1=documented,3=no space for documenting
		mpm2m2	mothers privacy maintained during labor and delivery MRN2 month2	Number	0=not documented,1=documented,3=no space for documenting
		mpm3m2	mothers privacy maintained during labor and delivery MRN3 month2	Number	0=not documented,1=documented,3=no space for documenting
		mpm4m2	mothers privacy maintained during labor and delivery MRN4 month2	Number	0=not documented,1=documented,3=no space for documenting
		mpm5m2	mothers privacy maintained during labor and delivery MRN5 month2	Number	0=not documented,1=documented,3=no space for documenting
		mpm6m2	mothers privacy maintained during labor and delivery MRN6 month2	Number	0=not documented,1=documented,3=no space for documenting
		mpm7m2	mothers privacy maintained during labor and delivery MRN7 month2	Number	0=not documented,1=documented,3=no space for documenting
		mpm8m2	mothers privacy maintained during labor and delivery MRN8 month2	Number	0=not documented,1=documented,3=no space for documenting
		mpm9m2	mothers privacy maintained during labor and delivery MRN9 month2	Number	0=not documented,1=documented,3=no space for documenting
		mpm10m2	mothers privacy maintained during labor and delivery MRN10 month2	Number	0=not documented,1=documented,3=no space for documenting
		mpmtm2	mothers privacy maintained during labor and delivery total month2	Number
		a_gswm1m2	Availability of gloves,soap/savlon&clean water MRN1 month2	Number	0=not documented,1=documented,3=no space for documenting
		a_gswm2m2	Availability of gloves,soap/savlon&clean water MRN2 month2	Number	0=not documented,1=documented,3=no space for documenting
		a_gswm3m2	Availability of gloves,soap/savlon&clean water MRN3 month2	Number	0=not documented,1=documented,3=no space for documenting
		a_gswm4m2	Availability of gloves,soap/savlon&clean water MRN4 month2	Number	0=not documented,1=documented,3=no space for documenting
		a_gswm5m2	Availability of gloves,soap/savlon&clean water MRN5 month2	Number	0=not documented,1=documented,3=no space for documenting
		a_gswm6m2	Availability of gloves,soap/savlon&clean water MRN6 month2	Number	0=not documented,1=documented,3=no space for documenting
		a_gswm7m2	Availability of gloves,soap/savlon&clean water MRN7 month2	Number	0=not documented,1=documented,3=no space for documenting
		a_gswm8m2	Availability of gloves,soap/savlon&clean water MRN8 month2	Number	0=not documented,1=documented,3=no space for documenting
		a_gswm9m2	Availability of gloves,soap/savlon&clean water MRN9 month2	Number	0=not documented,1=documented,3=no space for documenting
		a_gswm10m2	Availability of gloves,soap/savlon&clean water MRN10 month2	Number	0=not documented,1=documented,3=no space for documenting
		a_gswtm2	Availability of gloves,soap/savlon&clean water total month2	Number
		pusm1m2	Preparation of 10 IU IV/IM uterotonic syringeMRN1 month2	Number	0=not documented,1=documented,3=no space for documenting
		pusm2m2	Preparation of 10 IU IV/IM uterotonic syringeMRN2 month2	Number	0=not documented,1=documented,3=no space for documenting
		pusm3m2	Preparation of 10 IU IV/IM uterotonic syringeMRN3 month2	Number	0=not documented,1=documented,3=no space for documenting
		pusm4m2	Preparation of 10 IU IV/IM uterotonic syringeMRN4 month2	Number	0=not documented,1=documented,3=no space for documenting
		pusm5m2	Preparation of 10 IU IV/IM uterotonic syringeMRN5 month2	Number	0=not documented,1=documented,3=no space for documenting
		pusm6m2	Preparation of 10 IU IV/IM uterotonic syringeMRN6 month2	Number	0=not documented,1=documented,3=no space for documenting
		pusm7m2	Preparation of 10 IU IV/IM uterotonic syringeMRN7 month2	Number	0=not documented,1=documented,3=no space for documenting
		pusm8m2	Preparation of 10 IU IV/IM uterotonic syringeMRN8 month2	Number	0=not documented,1=documented,3=no space for documenting
		pusm9m2	Preparation of 10 IU IV/IM uterotonic syringeMRN9 month2	Number	0=not documented,1=documented,3=no space for documenting
		pusm10m2	Preparation of 10 IU IV/IM uterotonic syringeMRN10 month2	Number	0=not documented,1=documented,3=no space for documenting
		pustm2	Preparation of 10 IU IV/IM uterotonic syringetotal month2	Number
		a_tsm1m2	Availability of two clean,dry,warm towels&suction device MRN1 month2	Number	0=not documented,1=documented,3=no space for documenting
		a_tsm2m2	Availability of two clean,dry,warm towels&suction device MRN2 month2	Number	0=not documented,1=documented,3=no space for documenting
		a_tsm3m2	Availability of two clean,dry,warm towels&suction device MRN3 month2	Number	0=not documented,1=documented,3=no space for documenting
		a_tsm4m2	Availability of two clean,dry,warm towels&suction device MRN4 month2	Number	0=not documented,1=documented,3=no space for documenting
		a_tsm5m2	Availability of two clean,dry,warm towels&suction device MRN5 month2	Number	0=not documented,1=documented,3=no space for documenting
		a_tsm6m2	Availability of two clean,dry,warm towels&suction device MRN6 month2	Number	0=not documented,1=documented,3=no space for documenting
		a_tsm7m2	Availability of two clean,dry,warm towels&suction device MRN7 month2	Number	0=not documented,1=documented,3=no space for documenting
		a_tsm8m2	Availability of two clean,dry,warm towels&suction device MRN8 month2	Number	0=not documented,1=documented,3=no space for documenting
		a_tsm9m2	Availability of two clean,dry,warm towels&suction device MRN9 month2	Number	0=not documented,1=documented,3=no space for documenting
		a_tsm10m2	Availability of two clean,dry,warm towels&suction device MRN10 month2	Number	0=not documented,1=documented,3=no space for documenting
		a_tstm2	Availability of two clean,dry,warm towels&suction device total month2	Number
		a_bmm1m2	Availability of bag and mask (size 0 and 1) MRN1 month2	Number	0=not documented,1=documented,3=no space for documenting
		a_bmm2m2	Availability of bag and mask (size 0 and 1) MRN2 month2	Number	0=not documented,1=documented,3=no space for documenting
		a_bmm3m2	Availability of bag and mask (size 0 and 1) MRN3 month2	Number	0=not documented,1=documented,3=no space for documenting
		a_bmm4m2	Availability of bag and mask (size 0 and 1) MRN4 month2	Number	0=not documented,1=documented,3=no space for documenting
		a_bmm5m2	Availability of bag and mask (size 0 and 1) MRN5 month2	Number	0=not documented,1=documented,3=no space for documenting
		a_bmm6m2	Availability of bag and mask (size 0 and 1) MRN6 month2	Number	0=not documented,1=documented,3=no space for documenting
		a_bmm7m2	Availability of bag and mask (size 0 and 1) MRN7 month2	Number	0=not documented,1=documented,3=no space for documenting
		a_bmm8m2	Availability of bag and mask (size 0 and 1) MRN8 month2	Number	0=not documented,1=documented,3=no space for documenting
		a_bmm9m2	Availability of bag and mask (size 0 and 1) MRN9 month2	Number	0=not documented,1=documented,3=no space for documenting
		a_bmm10m2	Availability of bag and mask (size 0 and 1) MRN10 month2	Number	0=not documented,1=documented,3=no space for documenting
		a_bmtm2	Availability of bag and mask (size 0 and 1) total month2	Number
		hirm1m2	Helper/Assistant identified and informed for resuscitation MRN1 month2	Number	0=not documented,1=documented,3=no space for documenting
		hirm2m2	Helper/Assistant identified and informed for resuscitation MRN2 month2	Number	0=not documented,1=documented,3=no space for documenting
		hirm3m2	Helper/Assistant identified and informed for resuscitation MRN3 month2	Number	0=not documented,1=documented,3=no space for documenting
		hirm4m2	Helper/Assistant identified and informed for resuscitation MRN4 month2	Number	0=not documented,1=documented,3=no space for documenting
		hirm5m2	Helper/Assistant identified and informed for resuscitation MRN5 month2	Number	0=not documented,1=documented,3=no space for documenting
		hirm6m2	Helper/Assistant identified and informed for resuscitation MRN6 month2	Number	0=not documented,1=documented,3=no space for documenting
		hirm7m2	Helper/Assistant identified and informed for resuscitation MRN7 month2	Number	0=not documented,1=documented,3=no space for documenting
		hirm8m2	Helper/Assistant identified and informed for resuscitation MRN8 month2	Number	0=not documented,1=documented,3=no space for documenting
		hirm9m2	Helper/Assistant identified and informed for resuscitation MRN9 month2	Number	0=not documented,1=documented,3=no space for documenting
		hirm10m2	Helper/Assistant identified and informed for resuscitation MRN10 month2	Number	0=not documented,1=documented,3=no space for documenting
		hirtm2	Helper/Assistant identified and informed for resuscitation total month2	Number
		nam1m2	Newborn assessment MRN1 month2	Number	0=not documented,1=documented,3=no space for documenting
		nam2m2	Newborn assessment MRN2 month2	Number	0=not documented,1=documented,3=no space for documenting
		nam3m2	Newborn assessment MRN3 month2	Number	0=not documented,1=documented,3=no space for documenting
		nam4m2	Newborn assessment MRN4 month2	Number	0=not documented,1=documented,3=no space for documenting
		nam5m2	Newborn assessment MRN5 month2	Number	0=not documented,1=documented,3=no space for documenting
		nam6m2	Newborn assessment MRN6 month2	Number	0=not documented,1=documented,3=no space for documenting
		nam7m2	Newborn assessment MRN7 month2	Number	0=not documented,1=documented,3=no space for documenting
		nam8m2	Newborn assessment MRN8 month2	Number	0=not documented,1=documented,3=no space for documenting
		nam9m2	Newborn assessment MRN9 month2	Number	0=not documented,1=documented,3=no space for documenting
		nam10m2	Newborn assessment MRN10 month2	Number	0=not documented,1=documented,3=no space for documenting
		natm2	Newborn assessment total month2	Number
		sks_bm1m2	Immediate skin to skin and initiate breastfeeding within the 1st hour (measured by mother/baby bonding)MRN1 month2	Number	0=not documented,1=documented,3=no space for documenting
		sks_bm2m2	Immediate skin to skin and initiate breastfeeding within the 1st hour (measured by mother/baby bonding)MRN2 month2	Number	0=not documented,1=documented,3=no space for documenting
		sks_bm3m2	Immediate skin to skin and initiate breastfeeding within the 1st hour (measured by mother/baby bonding)MRN3 month2	Number	0=not documented,1=documented,3=no space for documenting
		sks_bm4m2	Immediate skin to skin and initiate breastfeeding within the 1st hour (measured by mother/baby bonding)MRN4 month2	Number	0=not documented,1=documented,3=no space for documenting
		sks_bm5m2	Immediate skin to skin and initiate breastfeeding within the 1st hour (measured by mother/baby bonding)MRN5 month2	Number	0=not documented,1=documented,3=no space for documenting
		sks_bm6m2	Immediate skin to skin and initiate breastfeeding within the 1st hour (measured by mother/baby bonding)MRN6 month2	Number	0=not documented,1=documented,3=no space for documenting
		sks_bm7m2	Immediate skin to skin and initiate breastfeeding within the 1st hour (measured by mother/baby bonding)MRN7 month2	Number	0=not documented,1=documented,3=no space for documenting
		sks_bm8m2	Immediate skin to skin and initiate breastfeeding within the 1st hour (measured by mother/baby bonding)MRN8 month2	Number	0=not documented,1=documented,3=no space for documenting
		sks_bm9m2	Immediate skin to skin and initiate breastfeeding within the 1st hour (measured by mother/baby bonding)MRN9 month2	Number	0=not documented,1=documented,3=no space for documenting
		sks_bm10m2	Immediate skin to skin and initiate breastfeeding within the 1st hour (measured by mother/baby bonding)MRN10 month2	Number	0=not documented,1=documented,3=no space for documenting
		sks_btm2	Immediate skin to skin and initiate breastfeeding within the 1st hour (measured by mother/baby bonding)total month2	Number
		wrm1m2	Baby weighed and recorded MRN1 month2	Number	0=not documented,1=documented,3=no space for documenting
		wrm2m2	Baby weighed and recorded MRN2 month2	Number	0=not documented,1=documented,3=no space for documenting
		wrm3m2	Baby weighed and recorded MRN3 month2	Number	0=not documented,1=documented,3=no space for documenting
		wrm4m2	Baby weighed and recorded MRN4 month2	Number	0=not documented,1=documented,3=no space for documenting
		wrm5m2	Baby weighed and recorded MRN5 month2	Number	0=not documented,1=documented,3=no space for documenting
		wrm6m2	Baby weighed and recorded MRN6 month2	Number	0=not documented,1=documented,3=no space for documenting
		wrm7m2	Baby weighed and recorded MRN7 month2	Number	0=not documented,1=documented,3=no space for documenting
		wrm8m2	Baby weighed and recorded MRN8 month2	Number	0=not documented,1=documented,3=no space for documenting
		wrm9m2	Baby weighed and recorded MRN9 month2	Number	0=not documented,1=documented,3=no space for documenting
		wrm10m2	Baby weighed and recorded MRN10 month2	Number	0=not documented,1=documented,3=no space for documenting
		wrtm2	Baby weighed and recorded total month2	Number
		vkm1m2	Administer Vit K1 to newborn MRN1 month2	Number	0=not documented,1=documented,3=no space for documenting
		vkm2m2	Administer Vit K1 to newborn MRN2 month2	Number	0=not documented,1=documented,3=no space for documenting
		vkm3m2	Administer Vit K1 to newborn MRN3 month2	Number	0=not documented,1=documented,3=no space for documenting
		vkm4m2	Administer Vit K1 to newborn MRN4 month2	Number	0=not documented,1=documented,3=no space for documenting
		vkm5m2	Administer Vit K1 to newborn MRN5 month2	Number	0=not documented,1=documented,3=no space for documenting
		vkm6m2	Administer Vit K1 to newborn MRN6 month2	Number	0=not documented,1=documented,3=no space for documenting
		vkm7m2	Administer Vit K1 to newborn MRN7 month2	Number	0=not documented,1=documented,3=no space for documenting
		vkm8m2	Administer Vit K1 to newborn MRN8 month2	Number	0=not documented,1=documented,3=no space for documenting
		vkm9m2	Administer Vit K1 to newborn MRN9 month2	Number	0=not documented,1=documented,3=no space for documenting
		vkm10m2	Administer Vit K1 to newborn MRN10 month2	Number	0=not documented,1=documented,3=no space for documenting
		vktm2	Administer Vit K1 to newborn total month2	Number
		ttm1m2	Administer Tetracycline Eye Ointment to newborn MRN1 month2	Number	0=not documented,1=documented,3=no space for documenting
		ttm2m2	Administer Tetracycline Eye Ointment to newborn MRN2 month2	Number	0=not documented,1=documented,3=no space for documenting
		ttm3m2	Administer Tetracycline Eye Ointment to newborn MRN3 month2	Number	0=not documented,1=documented,3=no space for documenting
		ttm4m2	Administer Tetracycline Eye Ointment to newborn MRN4 month2	Number	0=not documented,1=documented,3=no space for documenting
		ttm5m2	Administer Tetracycline Eye Ointment to newborn MRN5 month2	Number	0=not documented,1=documented,3=no space for documenting
		ttm6m2	Administer Tetracycline Eye Ointment to newborn MRN6 month2	Number	0=not documented,1=documented,3=no space for documenting
		ttm7m2	Administer Tetracycline Eye Ointment to newborn MRN7 month2	Number	0=not documented,1=documented,3=no space for documenting
		ttm8m2	Administer Tetracycline Eye Ointment to newborn MRN8 month2	Number	0=not documented,1=documented,3=no space for documenting
		ttm9m2	Administer Tetracycline Eye Ointment to newborn MRN9 month2	Number	0=not documented,1=documented,3=no space for documenting
		ttm10m2	Administer Tetracycline Eye Ointment to newborn MRN10 month2	Number	0=not documented,1=documented,3=no space for documenting
		tttm2	Administer Tetracycline Eye Ointment to newborn total month2	Number	0=not documented,1=documented,3=no space for documenting
		tm1m2	Total MRN1 month2	Number	0=not documented,1=documented,3=no space for documenting
		tm2m2	Total MRN2 month2	Number	0=not documented,1=documented,3=no space for documenting
		tm3m2	Total MRN3 month2	Number	0=not documented,1=documented,3=no space for documenting
		tm4m2	Total MRN4 month2	Number	0=not documented,1=documented,3=no space for documenting
		tm5m2	Total MRN5 month2	Number	0=not documented,1=documented,3=no space for documenting
		tm6m2	Total MRN6 month2	Number	0=not documented,1=documented,3=no space for documenting
		tm7m2	Total MRN7 month2	Number	0=not documented,1=documented,3=no space for documenting
		tm8m2	Total MRN8 month2	Number	0=not documented,1=documented,3=no space for documenting
		tm9m2	Total MRN9 month2	Number	0=not documented,1=documented,3=no space for documenting
		tm10m2	Total MRN10 month2	Number
		bpm1m3	BP measured on admission MRN1 month3	Number	0=not documented,1=documented,3=no space for documenting
		bpm2m3	BP measured on admission MRN2 month3	Number	0=not documented,1=documented,3=no space for documenting
		bpm3m3	BP measured on admission MRN3 month3	Number	0=not documented,1=documented,3=no space for documenting
		bpm4m3	BP measured on admission MRN4 month3	Number	0=not documented,1=documented,3=no space for documenting
		bpm5m3	BP measured on admission MRN5 month3	Number	0=not documented,1=documented,3=no space for documenting
		bpm6m3	BP measured on admission MRN6 month3	Number	0=not documented,1=documented,3=no space for documenting
		bpm7m3	BP measured on admission MRN7 month3	Number	0=not documented,1=documented,3=no space for documenting
		bpm8m3	BP measured on admission MRN8 month3	Number	0=not documented,1=documented,3=no space for documenting
		bpm9m3	BP measured on admission MRN9 month3	Number	0=not documented,1=documented,3=no space for documenting
		bpm10m3	BP measured on admission MRN10 month3	Number	0=not documented,1=documented,3=no space for documenting
		bptm3	BP measured on admission total month3	Number
		pm1m3	Partograph started when cervical dilatation at least 4cm MRN1 month3	Number	0=not documented,1=documented,3=no space for documenting
		pm2m3	Partograph started when cervical dilatation at least 4cm MRN2 month3	Number	0=not documented,1=documented,3=no space for documenting
		pm3m3	Partograph started when cervical dilatation at least 4cm MRN3 month3	Number	0=not documented,1=documented,3=no space for documenting
		pm4m3	Partograph started when cervical dilatation at least 4cm MRN4 month3	Number	0=not documented,1=documented,3=no space for documenting
		pm5m3	Partograph started when cervical dilatation at least 4cm MRN5 month3	Number	0=not documented,1=documented,3=no space for documenting
		pm6m3	Partograph started when cervical dilatation at least 4cm MRN6 month3	Number	0=not documented,1=documented,3=no space for documenting
		pm7m3	Partograph started when cervical dilatation at least 4cm MRN7 month3	Number	0=not documented,1=documented,3=no space for documenting
		pm8m3	Partograph started when cervical dilatation at least 4cm MRN8 month3	Number	0=not documented,1=documented,3=no space for documenting
		pm9m3	Partograph started when cervical dilatation at least 4cm MRN9 month3	Number	0=not documented,1=documented,3=no space for documenting
		pm10m3	Partograph started when cervical dilatation at least 4cm MRN10 month3	Number	0=not documented,1=documented,3=no space for documenting
		ptm3	Partograph started when cervical dilatation at least 4cm total month3	Number
		swgm1m3	Availability of soap,water,alcohol hand rub&gloves MRN1 month3	Number	0=not documented,1=documented,3=no space for documenting
		swgm2m3	Availability of soap,water,alcohol hand rub&gloves MRN2 month3	Number	0=not documented,1=documented,3=no space for documenting
		swgm3m3	Availability of soap,water,alcohol hand rub&gloves MRN3 month3	Number	0=not documented,1=documented,3=no space for documenting
		swgm4m3	Availability of soap,water,alcohol hand rub&gloves MRN4 month3	Number	0=not documented,1=documented,3=no space for documenting
		swgm5m3	Availability of soap,water,alcohol hand rub&gloves MRN5 month3	Number	0=not documented,1=documented,3=no space for documenting
		swgm6m3	Availability of soap,water,alcohol hand rub&gloves MRN6 month3	Number	0=not documented,1=documented,3=no space for documenting
		swgm7m3	Availability of soap,water,alcohol hand rub&gloves MRN7 month3	Number	0=not documented,1=documented,3=no space for documenting
		swgm8m3	Availability of soap,water,alcohol hand rub&gloves MRN8 month3	Number	0=not documented,1=documented,3=no space for documenting
		swgm9m3	Availability of soap,water,alcohol hand rub&gloves MRN9 month3	Number	0=not documented,1=documented,3=no space for documenting
		swgm10m3	Availability of soap,water,alcohol hand rub&gloves MRN10 month3	Number	0=not documented,1=documented,3=no space for documenting
		swgtm3	Availability of soap,water,alcohol hand rub&gloves total month3	Number
		bcpm1m3	Birth companion encouraged to be present during labor & birth MRN1 month3	Number	0=not documented,1=documented,3=no space for documenting
		bcpm2m3	Birth companion encouraged to be present during labor & birth MRN2 month3	Number	0=not documented,1=documented,3=no space for documenting
		bcpm3m3	Birth companion encouraged to be present during labor & birth MRN3 month3	Number	0=not documented,1=documented,3=no space for documenting
		bcpm4m3	Birth companion encouraged to be present during labor & birth MRN4 month3	Number	0=not documented,1=documented,3=no space for documenting
		bcpm5m3	Birth companion encouraged to be present during labor & birth MRN5 month3	Number	0=not documented,1=documented,3=no space for documenting
		bcpm6m3	Birth companion encouraged to be present during labor & birth MRN6 month3	Number	0=not documented,1=documented,3=no space for documenting
		bcpm7m3	Birth companion encouraged to be present during labor & birth MRN7 month3	Number	0=not documented,1=documented,3=no space for documenting
		bcpm8m3	Birth companion encouraged to be present during labor & birth MRN8 month3	Number	0=not documented,1=documented,3=no space for documenting
		bcpm9m3	Birth companion encouraged to be present during labor & birth MRN9 month3	Number	0=not documented,1=documented,3=no space for documenting
		bcpm10m3	Birth companion encouraged to be present during labor & birth MRN10 month3	Number	0=not documented,1=documented,3=no space for documenting
		bcptm3	Birth companion encouraged to be present during labor & birth total month3	Number
		mpm1m3	mothers privacy maintained during labor and delivery MRN1 month3	Number	0=not documented,1=documented,3=no space for documenting
		mpm2m3	mothers privacy maintained during labor and delivery MRN2 month3	Number	0=not documented,1=documented,3=no space for documenting
		mpm3m3	mothers privacy maintained during labor and delivery MRN3 month3	Number	0=not documented,1=documented,3=no space for documenting
		mpm4m3	mothers privacy maintained during labor and delivery MRN4 month3	Number	0=not documented,1=documented,3=no space for documenting
		mpm5m3	mothers privacy maintained during labor and delivery MRN5 month3	Number	0=not documented,1=documented,3=no space for documenting
		mpm6m3	mothers privacy maintained during labor and delivery MRN6 month3	Number	0=not documented,1=documented,3=no space for documenting
		mpm7m3	mothers privacy maintained during labor and delivery MRN7 month3	Number	0=not documented,1=documented,3=no space for documenting
		mpm8m3	mothers privacy maintained during labor and delivery MRN8 month3	Number	0=not documented,1=documented,3=no space for documenting
		mpm9m3	mothers privacy maintained during labor and delivery MRN9 month3	Number	0=not documented,1=documented,3=no space for documenting
		mpm10m3	mothers privacy maintained during labor and delivery MRN10 month3	Number	0=not documented,1=documented,3=no space for documenting
		mpmtm3	mothers privacy maintained during labor and delivery total month3	Number
		a_gswm1m3	Availability of gloves,soap/savlon&clean water MRN1 month3	Number	0=not documented,1=documented,3=no space for documenting
		a_gswm2m3	Availability of gloves,soap/savlon&clean water MRN2 month3	Number	0=not documented,1=documented,3=no space for documenting
		a_gswm3m3	Availability of gloves,soap/savlon&clean water MRN3 month3	Number	0=not documented,1=documented,3=no space for documenting
		a_gswm4m3	Availability of gloves,soap/savlon&clean water MRN4 month3	Number	0=not documented,1=documented,3=no space for documenting
		a_gswm5m3	Availability of gloves,soap/savlon&clean water MRN5 month3	Number	0=not documented,1=documented,3=no space for documenting
		a_gswm6m3	Availability of gloves,soap/savlon&clean water MRN6 month3	Number	0=not documented,1=documented,3=no space for documenting
		a_gswm7m3	Availability of gloves,soap/savlon&clean water MRN7 month3	Number	0=not documented,1=documented,3=no space for documenting
		a_gswm8m3	Availability of gloves,soap/savlon&clean water MRN8 month3	Number	0=not documented,1=documented,3=no space for documenting
		a_gswm9m3	Availability of gloves,soap/savlon&clean water MRN9 month3	Number	0=not documented,1=documented,3=no space for documenting
		a_gswm10m3	Availability of gloves,soap/savlon&clean water MRN10 month3	Number	0=not documented,1=documented,3=no space for documenting
		a_gswtm3	Availability of gloves,soap/savlon&clean water total month3	Number
		pusm1m3	Preparation of 10 IU IV/IM uterotonic syringeMRN1 month3	Number	0=not documented,1=documented,3=no space for documenting
		pusm2m3	Preparation of 10 IU IV/IM uterotonic syringeMRN2 month3	Number	0=not documented,1=documented,3=no space for documenting
		pusm3m3	Preparation of 10 IU IV/IM uterotonic syringeMRN3 month3	Number	0=not documented,1=documented,3=no space for documenting
		pusm4m3	Preparation of 10 IU IV/IM uterotonic syringeMRN4 month3	Number	0=not documented,1=documented,3=no space for documenting
		pusm5m3	Preparation of 10 IU IV/IM uterotonic syringeMRN5 month3	Number	0=not documented,1=documented,3=no space for documenting
		pusm6m3	Preparation of 10 IU IV/IM uterotonic syringeMRN6 month3	Number	0=not documented,1=documented,3=no space for documenting
		pusm7m3	Preparation of 10 IU IV/IM uterotonic syringeMRN7 month3	Number	0=not documented,1=documented,3=no space for documenting
		pusm8m3	Preparation of 10 IU IV/IM uterotonic syringeMRN8 month3	Number	0=not documented,1=documented,3=no space for documenting
		pusm9m3	Preparation of 10 IU IV/IM uterotonic syringeMRN9 month3	Number	0=not documented,1=documented,3=no space for documenting
		pusm10m3	Preparation of 10 IU IV/IM uterotonic syringeMRN10 month3	Number	0=not documented,1=documented,3=no space for documenting
		pustm3	Preparation of 10 IU IV/IM uterotonic syringetotal month3	Number
		a_tsm1m3	Availability of two clean,dry,warm towels&suction device MRN1 month3	Number	0=not documented,1=documented,3=no space for documenting
		a_tsm2m3	Availability of two clean,dry,warm towels&suction device MRN2 month3	Number	0=not documented,1=documented,3=no space for documenting
		a_tsm3m3	Availability of two clean,dry,warm towels&suction device MRN3 month3	Number	0=not documented,1=documented,3=no space for documenting
		a_tsm4m3	Availability of two clean,dry,warm towels&suction device MRN4 month3	Number	0=not documented,1=documented,3=no space for documenting
		a_tsm5m3	Availability of two clean,dry,warm towels&suction device MRN5 month3	Number	0=not documented,1=documented,3=no space for documenting
		a_tsm6m3	Availability of two clean,dry,warm towels&suction device MRN6 month3	Number	0=not documented,1=documented,3=no space for documenting
		a_tsm7m3	Availability of two clean,dry,warm towels&suction device MRN7 month3	Number	0=not documented,1=documented,3=no space for documenting
		a_tsm8m3	Availability of two clean,dry,warm towels&suction device MRN8 month3	Number	0=not documented,1=documented,3=no space for documenting
		a_tsm9m3	Availability of two clean,dry,warm towels&suction device MRN9 month3	Number	0=not documented,1=documented,3=no space for documenting
		a_tsm10m3	Availability of two clean,dry,warm towels&suction device MRN10 month3	Number	0=not documented,1=documented,3=no space for documenting
		a_tstm3	Availability of two clean,dry,warm towels&suction device total month3	Number
		a_bmm1m3	Availability of bag and mask (size 0 and 1) MRN1 month3	Number	0=not documented,1=documented,3=no space for documenting
		a_bmm2m3	Availability of bag and mask (size 0 and 1) MRN2 month3	Number	0=not documented,1=documented,3=no space for documenting
		a_bmm3m3	Availability of bag and mask (size 0 and 1) MRN3 month3	Number	0=not documented,1=documented,3=no space for documenting
		a_bmm4m3	Availability of bag and mask (size 0 and 1) MRN4 month3	Number	0=not documented,1=documented,3=no space for documenting
		a_bmm5m3	Availability of bag and mask (size 0 and 1) MRN5 month3	Number	0=not documented,1=documented,3=no space for documenting
		a_bmm6m3	Availability of bag and mask (size 0 and 1) MRN6 month3	Number	0=not documented,1=documented,3=no space for documenting
		a_bmm7m3	Availability of bag and mask (size 0 and 1) MRN7 month3	Number	0=not documented,1=documented,3=no space for documenting
		a_bmm8m3	Availability of bag and mask (size 0 and 1) MRN8 month3	Number	0=not documented,1=documented,3=no space for documenting
		a_bmm9m3	Availability of bag and mask (size 0 and 1) MRN9 month3	Number	0=not documented,1=documented,3=no space for documenting
		a_bmm10m3	Availability of bag and mask (size 0 and 1) MRN10 month3	Number	0=not documented,1=documented,3=no space for documenting
		a_bmtm3	Availability of bag and mask (size 0 and 1) total month3	Number
		hirm1m3	Helper/Assistant identified and informed for resuscitation MRN1 month3	Number	0=not documented,1=documented,3=no space for documenting
		hirm2m3	Helper/Assistant identified and informed for resuscitation MRN2 month3	Number	0=not documented,1=documented,3=no space for documenting
		hirm3m3	Helper/Assistant identified and informed for resuscitation MRN3 month3	Number	0=not documented,1=documented,3=no space for documenting
		hirm4m3	Helper/Assistant identified and informed for resuscitation MRN4 month3	Number	0=not documented,1=documented,3=no space for documenting
		hirm5m3	Helper/Assistant identified and informed for resuscitation MRN5 month3	Number	0=not documented,1=documented,3=no space for documenting
		hirm6m3	Helper/Assistant identified and informed for resuscitation MRN6 month3	Number	0=not documented,1=documented,3=no space for documenting
		hirm7m3	Helper/Assistant identified and informed for resuscitation MRN7 month3	Number	0=not documented,1=documented,3=no space for documenting
		hirm8m3	Helper/Assistant identified and informed for resuscitation MRN8 month3	Number	0=not documented,1=documented,3=no space for documenting
		hirm9m3	Helper/Assistant identified and informed for resuscitation MRN9 month3	Number	0=not documented,1=documented,3=no space for documenting
		hirm10m3	Helper/Assistant identified and informed for resuscitation MRN10 month3	Number	0=not documented,1=documented,3=no space for documenting
		hirtm3	Helper/Assistant identified and informed for resuscitation total month3	Number
		nam1m3	Newborn assessment MRN1 month3	Number	0=not documented,1=documented,3=no space for documenting
		nam2m3	Newborn assessment MRN2 month3	Number	0=not documented,1=documented,3=no space for documenting
		nam3m3	Newborn assessment MRN3 month3	Number	0=not documented,1=documented,3=no space for documenting
		nam4m3	Newborn assessment MRN4 month3	Number	0=not documented,1=documented,3=no space for documenting
		nam5m3	Newborn assessment MRN5 month3	Number	0=not documented,1=documented,3=no space for documenting
		nam6m3	Newborn assessment MRN6 month3	Number	0=not documented,1=documented,3=no space for documenting
		nam7m3	Newborn assessment MRN7 month3	Number	0=not documented,1=documented,3=no space for documenting
		nam8m3	Newborn assessment MRN8 month3	Number	0=not documented,1=documented,3=no space for documenting
		nam9m3	Newborn assessment MRN9 month3	Number	0=not documented,1=documented,3=no space for documenting
		nam10m3	Newborn assessment MRN10 month3	Number	0=not documented,1=documented,3=no space for documenting
		natm3	Newborn assessment total month3	Number
		sks_bm1m3	Immediate skin to skin and initiate breastfeeding within the 1st hour (measured by mother/baby bonding)MRN1 month3	Number	0=not documented,1=documented,3=no space for documenting
		sks_bm2m3	Immediate skin to skin and initiate breastfeeding within the 1st hour (measured by mother/baby bonding)MRN2 month3	Number	0=not documented,1=documented,3=no space for documenting
		sks_bm3m3	Immediate skin to skin and initiate breastfeeding within the 1st hour (measured by mother/baby bonding)MRN3 month3	Number	0=not documented,1=documented,3=no space for documenting
		sks_bm4m3	Immediate skin to skin and initiate breastfeeding within the 1st hour (measured by mother/baby bonding)MRN4 month3	Number	0=not documented,1=documented,3=no space for documenting
		sks_bm5m3	Immediate skin to skin and initiate breastfeeding within the 1st hour (measured by mother/baby bonding)MRN5 month3	Number	0=not documented,1=documented,3=no space for documenting
		sks_bm6m3	Immediate skin to skin and initiate breastfeeding within the 1st hour (measured by mother/baby bonding)MRN6 month3	Number	0=not documented,1=documented,3=no space for documenting
		sks_bm7m3	Immediate skin to skin and initiate breastfeeding within the 1st hour (measured by mother/baby bonding)MRN7 month3	Number	0=not documented,1=documented,3=no space for documenting
		sks_bm8m3	Immediate skin to skin and initiate breastfeeding within the 1st hour (measured by mother/baby bonding)MRN8 month3	Number	0=not documented,1=documented,3=no space for documenting
		sks_bm9m3	Immediate skin to skin and initiate breastfeeding within the 1st hour (measured by mother/baby bonding)MRN9 month3	Number	0=not documented,1=documented,3=no space for documenting
		sks_bm10m3	Immediate skin to skin and initiate breastfeeding within the 1st hour (measured by mother/baby bonding)MRN10 month3	Number	0=not documented,1=documented,3=no space for documenting
		sks_btm3	Immediate skin to skin and initiate breastfeeding within the 1st hour (measured by mother/baby bonding)total month3	Number
		wrm1m3	Baby weighed and recorded MRN1 month3	Number	0=not documented,1=documented,3=no space for documenting
		wrm2m3	Baby weighed and recorded MRN2 month3	Number	0=not documented,1=documented,3=no space for documenting
		wrm3m3	Baby weighed and recorded MRN3 month3	Number	0=not documented,1=documented,3=no space for documenting
		wrm4m3	Baby weighed and recorded MRN4 month3	Number	0=not documented,1=documented,3=no space for documenting
		wrm5m3	Baby weighed and recorded MRN5 month3	Number	0=not documented,1=documented,3=no space for documenting
		wrm6m3	Baby weighed and recorded MRN6 month3	Number	0=not documented,1=documented,3=no space for documenting
		wrm7m3	Baby weighed and recorded MRN7 month3	Number	0=not documented,1=documented,3=no space for documenting
		wrm8m3	Baby weighed and recorded MRN8 month3	Number	0=not documented,1=documented,3=no space for documenting
		wrm9m3	Baby weighed and recorded MRN9 month3	Number	0=not documented,1=documented,3=no space for documenting
		wrm10m3	Baby weighed and recorded MRN10 month3	Number	0=not documented,1=documented,3=no space for documenting
		wrtm3	Baby weighed and recorded total month3	Number
		vkm1m3	Administer Vit K1 to newborn MRN1 month3	Number	0=not documented,1=documented,3=no space for documenting
		vkm2m3	Administer Vit K1 to newborn MRN2 month3	Number	0=not documented,1=documented,3=no space for documenting
		vkm3m3	Administer Vit K1 to newborn MRN3 month3	Number	0=not documented,1=documented,3=no space for documenting
		vkm4m3	Administer Vit K1 to newborn MRN4 month3	Number	0=not documented,1=documented,3=no space for documenting
		vkm5m3	Administer Vit K1 to newborn MRN5 month3	Number	0=not documented,1=documented,3=no space for documenting
		vkm6m3	Administer Vit K1 to newborn MRN6 month3	Number	0=not documented,1=documented,3=no space for documenting
		vkm7m3	Administer Vit K1 to newborn MRN7 month3	Number	0=not documented,1=documented,3=no space for documenting
		vkm8m3	Administer Vit K1 to newborn MRN8 month3	Number	0=not documented,1=documented,3=no space for documenting
		vkm9m3	Administer Vit K1 to newborn MRN9 month3	Number	0=not documented,1=documented,3=no space for documenting
		vkm10m3	Administer Vit K1 to newborn MRN10 month3	Number	0=not documented,1=documented,3=no space for documenting
		vktm3	Administer Vit K1 to newborn total month3	Number	0=not documented,1=documented,3=no space for documenting
		ttm1m3	Administer Tetracycline Eye Ointment to newborn MRN1 month3	Number	0=not documented,1=documented,3=no space for documenting
		ttm2m3	Administer Tetracycline Eye Ointment to newborn MRN2 month3	Number	0=not documented,1=documented,3=no space for documenting
		ttm3m3	Administer Tetracycline Eye Ointment to newborn MRN3 month3	Number	0=not documented,1=documented,3=no space for documenting
		ttm4m3	Administer Tetracycline Eye Ointment to newborn MRN4 month3	Number	0=not documented,1=documented,3=no space for documenting
		ttm5m3	Administer Tetracycline Eye Ointment to newborn MRN5 month3	Number	0=not documented,1=documented,3=no space for documenting
		ttm6m3	Administer Tetracycline Eye Ointment to newborn MRN6 month3	Number	0=not documented,1=documented,3=no space for documenting
		ttm7m3	Administer Tetracycline Eye Ointment to newborn MRN7 month3	Number	0=not documented,1=documented,3=no space for documenting
		ttm8m3	Administer Tetracycline Eye Ointment to newborn MRN8 month3	Number	0=not documented,1=documented,3=no space for documenting
		ttm9m3	Administer Tetracycline Eye Ointment to newborn MRN9 month3	Number	0=not documented,1=documented,3=no space for documenting
		ttm10m3	Administer Tetracycline Eye Ointment to newborn MRN10 month3	Number
		tttm3	Administer Tetracycline Eye Ointment to newborn total month3	Number	0=not documented,1=documented,3=no space for documenting
		tm1m3	Total MRN1 month3	Number	0=not documented,1=documented,3=no space for documenting
		tm2m3	Total MRN2 month3	Number	0=not documented,1=documented,3=no space for documenting
		tm3m3	Total MRN3 month3	Number	0=not documented,1=documented,3=no space for documenting
		tm4m3	Total MRN4 month3	Number	0=not documented,1=documented,3=no space for documenting
		tm5m3	Total MRN5 month3	Number	0=not documented,1=documented,3=no space for documenting
		tm6m3	Total MRN6 month3	Number	0=not documented,1=documented,3=no space for documenting
		tm7m3	Total MRN7 month3	Number	0=not documented,1=documented,3=no space for documenting
		tm8m3	Total MRN8 month3	Number	0=not documented,1=documented,3=no space for documenting
		tm9m3	Total MRN9 month3	Number	0=not documented,1=documented,3=no space for documenting
		tm10m3	Total MRN10 month3	Number
		bpm1m4	BP measured on admission MRN1 month4	Number	0=not documented,1=documented,3=no space for documenting
		bpm2m4	BP measured on admission MRN2 month4	Number	0=not documented,1=documented,3=no space for documenting
		bpm3m4	BP measured on admission MRN3 month4	Number	0=not documented,1=documented,3=no space for documenting
		bpm4m4	BP measured on admission MRN4 month4	Number	0=not documented,1=documented,3=no space for documenting
		bpm5m4	BP measured on admission MRN5 month4	Number	0=not documented,1=documented,3=no space for documenting
		bpm6m4	BP measured on admission MRN6 month4	Number	0=not documented,1=documented,3=no space for documenting
		bpm7m4	BP measured on admission MRN7 month4	Number	0=not documented,1=documented,3=no space for documenting
		bpm8m4	BP measured on admission MRN8 month4	Number	0=not documented,1=documented,3=no space for documenting
		bpm9m4	BP measured on admission MRN9 month4	Number	0=not documented,1=documented,3=no space for documenting
		bpm10m4	BP measured on admission MRN10 month4	Number	0=not documented,1=documented,3=no space for documenting
		bptm4	BP measured on admission total month4	Number
		pm1m4	Partograph started when cervical dilatation at least 4cm MRN1 month4	Number	0=not documented,1=documented,3=no space for documenting
		pm2m4	Partograph started when cervical dilatation at least 4cm MRN2 month4	Number	0=not documented,1=documented,3=no space for documenting
		pm3m4	Partograph started when cervical dilatation at least 4cm MRN3 month4	Number	0=not documented,1=documented,3=no space for documenting
		pm4m4	Partograph started when cervical dilatation at least 4cm MRN4 month4	Number	0=not documented,1=documented,3=no space for documenting
		pm5m4	Partograph started when cervical dilatation at least 4cm MRN5 month4	Number	0=not documented,1=documented,3=no space for documenting
		pm6m4	Partograph started when cervical dilatation at least 4cm MRN6 month4	Number	0=not documented,1=documented,3=no space for documenting
		pm7m4	Partograph started when cervical dilatation at least 4cm MRN7 month4	Number	0=not documented,1=documented,3=no space for documenting
		pm8m4	Partograph started when cervical dilatation at least 4cm MRN8 month4	Number	0=not documented,1=documented,3=no space for documenting
		pm9m4	Partograph started when cervical dilatation at least 4cm MRN9 month4	Number	0=not documented,1=documented,3=no space for documenting
		pm10m4	Partograph started when cervical dilatation at least 4cm MRN10 month4	Number	0=not documented,1=documented,3=no space for documenting
		ptm4	Partograph started when cervical dilatation at least 4cm total month4	Number
		swgm1m4	Availability of soap,water,alcohol hand rub&gloves MRN1 month4	Number	0=not documented,1=documented,3=no space for documenting
		swgm2m4	Availability of soap,water,alcohol hand rub&gloves MRN2 month4	Number	0=not documented,1=documented,3=no space for documenting
		swgm3m4	Availability of soap,water,alcohol hand rub&gloves MRN3 month4	Number	0=not documented,1=documented,3=no space for documenting
		swgm4m4	Availability of soap,water,alcohol hand rub&gloves MRN4 month4	Number	0=not documented,1=documented,3=no space for documenting
		swgm5m4	Availability of soap,water,alcohol hand rub&gloves MRN5 month4	Number	0=not documented,1=documented,3=no space for documenting
		swgm6m4	Availability of soap,water,alcohol hand rub&gloves MRN6 month4	Number	0=not documented,1=documented,3=no space for documenting
		swgm7m4	Availability of soap,water,alcohol hand rub&gloves MRN7 month4	Number	0=not documented,1=documented,3=no space for documenting
		swgm8m4	Availability of soap,water,alcohol hand rub&gloves MRN8 month4	Number	0=not documented,1=documented,3=no space for documenting
		swgm9m4	Availability of soap,water,alcohol hand rub&gloves MRN9 month4	Number	0=not documented,1=documented,3=no space for documenting
		swgm10m4	Availability of soap,water,alcohol hand rub&gloves MRN10 month4	Number	0=not documented,1=documented,3=no space for documenting
		swgtm4	Availability of soap,water,alcohol hand rub&gloves total month4	Number
		bcpm1m4	Birth companion encouraged to be present during labor & birth MRN1 month4	Number	0=not documented,1=documented,3=no space for documenting
		bcpm2m4	Birth companion encouraged to be present during labor & birth MRN2 month4	Number	0=not documented,1=documented,3=no space for documenting
		bcpm3m4	Birth companion encouraged to be present during labor & birth MRN3 month4	Number	0=not documented,1=documented,3=no space for documenting
		bcpm4m4	Birth companion encouraged to be present during labor & birth MRN4 month4	Number	0=not documented,1=documented,3=no space for documenting
		bcpm5m4	Birth companion encouraged to be present during labor & birth MRN5 month4	Number	0=not documented,1=documented,3=no space for documenting
		bcpm6m4	Birth companion encouraged to be present during labor & birth MRN6 month4	Number	0=not documented,1=documented,3=no space for documenting
		bcpm7m4	Birth companion encouraged to be present during labor & birth MRN7 month4	Number	0=not documented,1=documented,3=no space for documenting
		bcpm8m4	Birth companion encouraged to be present during labor & birth MRN8 month4	Number	0=not documented,1=documented,3=no space for documenting
		bcpm9m4	Birth companion encouraged to be present during labor & birth MRN9 month4	Number	0=not documented,1=documented,3=no space for documenting
		bcpm10m4	Birth companion encouraged to be present during labor & birth MRN10 month4	Number	0=not documented,1=documented,3=no space for documenting
		bcptm4	Birth companion encouraged to be present during labor & birth total month4	Number
		mpm1m4	mothers privacy maintained during labor and delivery MRN1 month4	Number	0=not documented,1=documented,3=no space for documenting
		mpm2m4	mothers privacy maintained during labor and delivery MRN2 month4	Number	0=not documented,1=documented,3=no space for documenting
		mpm3m4	mothers privacy maintained during labor and delivery MRN3 month4	Number	0=not documented,1=documented,3=no space for documenting
		mpm4m4	mothers privacy maintained during labor and delivery MRN4 month4	Number	0=not documented,1=documented,3=no space for documenting
		mpm5m4	mothers privacy maintained during labor and delivery MRN5 month4	Number	0=not documented,1=documented,3=no space for documenting
		mpm6m4	mothers privacy maintained during labor and delivery MRN6 month4	Number	0=not documented,1=documented,3=no space for documenting
		mpm7m4	mothers privacy maintained during labor and delivery MRN7 month4	Number	0=not documented,1=documented,3=no space for documenting
		mpm8m4	mothers privacy maintained during labor and delivery MRN8 month4	Number	0=not documented,1=documented,3=no space for documenting
		mpm9m4	mothers privacy maintained during labor and delivery MRN9 month4	Number	0=not documented,1=documented,3=no space for documenting
		mpm10m4	mothers privacy maintained during labor and delivery MRN10 month4	Number	0=not documented,1=documented,3=no space for documenting
		mpmtm4	mothers privacy maintained during labor and delivery total month4	Number
		a_gswm1m4	Availability of gloves,soap/savlon&clean water MRN1 month4	Number	0=not documented,1=documented,3=no space for documenting
		a_gswm2m4	Availability of gloves,soap/savlon&clean water MRN2 month4	Number	0=not documented,1=documented,3=no space for documenting
		a_gswm3m4	Availability of gloves,soap/savlon&clean water MRN3 month4	Number	0=not documented,1=documented,3=no space for documenting
		a_gswm4m4	Availability of gloves,soap/savlon&clean water MRN4 month4	Number	0=not documented,1=documented,3=no space for documenting
		a_gswm5m4	Availability of gloves,soap/savlon&clean water MRN5 month4	Number	0=not documented,1=documented,3=no space for documenting
		a_gswm6m4	Availability of gloves,soap/savlon&clean water MRN6 month4	Number	0=not documented,1=documented,3=no space for documenting
		a_gswm7m4	Availability of gloves,soap/savlon&clean water MRN7 month4	Number	0=not documented,1=documented,3=no space for documenting
		a_gswm8m4	Availability of gloves,soap/savlon&clean water MRN8 month4	Number	0=not documented,1=documented,3=no space for documenting
		a_gswm9m4	Availability of gloves,soap/savlon&clean water MRN9 month4	Number	0=not documented,1=documented,3=no space for documenting
		a_gswm10m4	Availability of gloves,soap/savlon&clean water MRN10 month4	Number	0=not documented,1=documented,3=no space for documenting
		a_gswtm4	Availability of gloves,soap/savlon&clean water total month4	Number
		pusm1m4	Preparation of 10 IU IV/IM uterotonic syringeMRN1 month4	Number	0=not documented,1=documented,3=no space for documenting
		pusm2m4	Preparation of 10 IU IV/IM uterotonic syringeMRN2 month4	Number	0=not documented,1=documented,3=no space for documenting
		pusm3m4	Preparation of 10 IU IV/IM uterotonic syringeMRN3 month4	Number	0=not documented,1=documented,3=no space for documenting
		pusm4m4	Preparation of 10 IU IV/IM uterotonic syringeMRN4 month4	Number	0=not documented,1=documented,3=no space for documenting
		pusm5m4	Preparation of 10 IU IV/IM uterotonic syringeMRN5 month4	Number	0=not documented,1=documented,3=no space for documenting
		pusm6m4	Preparation of 10 IU IV/IM uterotonic syringeMRN6 month4	Number	0=not documented,1=documented,3=no space for documenting
		pusm7m4	Preparation of 10 IU IV/IM uterotonic syringeMRN7 month4	Number	0=not documented,1=documented,3=no space for documenting
		pusm8m4	Preparation of 10 IU IV/IM uterotonic syringeMRN8 month4	Number	0=not documented,1=documented,3=no space for documenting
		pusm9m4	Preparation of 10 IU IV/IM uterotonic syringeMRN9 month4	Number	0=not documented,1=documented,3=no space for documenting
		pusm10m4	Preparation of 10 IU IV/IM uterotonic syringeMRN10 month4	Number	0=not documented,1=documented,3=no space for documenting
		pustm4	Preparation of 10 IU IV/IM uterotonic syringetotal month4	Number
		a_tsm1m4	Availability of two clean,dry,warm towels&suction device MRN1 month4	Number	0=not documented,1=documented,3=no space for documenting
		a_tsm2m4	Availability of two clean,dry,warm towels&suction device MRN2 month4	Number	0=not documented,1=documented,3=no space for documenting
		a_tsm3m4	Availability of two clean,dry,warm towels&suction device MRN3 month4	Number	0=not documented,1=documented,3=no space for documenting
		a_tsm4m4	Availability of two clean,dry,warm towels&suction device MRN4 month4	Number	0=not documented,1=documented,3=no space for documenting
		a_tsm5m4	Availability of two clean,dry,warm towels&suction device MRN5 month4	Number	0=not documented,1=documented,3=no space for documenting
		a_tsm6m4	Availability of two clean,dry,warm towels&suction device MRN6 month4	Number	0=not documented,1=documented,3=no space for documenting
		a_tsm7m4	Availability of two clean,dry,warm towels&suction device MRN7 month4	Number	0=not documented,1=documented,3=no space for documenting
		a_tsm8m4	Availability of two clean,dry,warm towels&suction device MRN8 month4	Number	0=not documented,1=documented,3=no space for documenting
		a_tsm9m4	Availability of two clean,dry,warm towels&suction device MRN9 month4	Number	0=not documented,1=documented,3=no space for documenting
		a_tsm10m4	Availability of two clean,dry,warm towels&suction device MRN10 month4	Number	0=not documented,1=documented,3=no space for documenting
		a_tstm4	Availability of two clean,dry,warm towels&suction device total month4	Number
		a_bmm1m4	Availability of bag and mask (size 0 and 1) MRN1 month4	Number	0=not documented,1=documented,3=no space for documenting
		a_bmm2m4	Availability of bag and mask (size 0 and 1) MRN2 month4	Number	0=not documented,1=documented,3=no space for documenting
		a_bmm3m4	Availability of bag and mask (size 0 and 1) MRN3 month4	Number	0=not documented,1=documented,3=no space for documenting
		a_bmm4m4	Availability of bag and mask (size 0 and 1) MRN4 month4	Number	0=not documented,1=documented,3=no space for documenting
		a_bmm5m4	Availability of bag and mask (size 0 and 1) MRN5 month4	Number	0=not documented,1=documented,3=no space for documenting
		a_bmm6m4	Availability of bag and mask (size 0 and 1) MRN6 month4	Number	0=not documented,1=documented,3=no space for documenting
		a_bmm7m4	Availability of bag and mask (size 0 and 1) MRN7 month4	Number	0=not documented,1=documented,3=no space for documenting
		a_bmm8m4	Availability of bag and mask (size 0 and 1) MRN8 month4	Number	0=not documented,1=documented,3=no space for documenting
		a_bmm9m4	Availability of bag and mask (size 0 and 1) MRN9 month4	Number	0=not documented,1=documented,3=no space for documenting
		a_bmm10m4	Availability of bag and mask (size 0 and 1) MRN10 month4	Number	0=not documented,1=documented,3=no space for documenting
		a_bmtm4	Availability of bag and mask (size 0 and 1) total month4	Number
		hirm1m4	Helper/Assistant identified and informed for resuscitation MRN1 month4	Number	0=not documented,1=documented,3=no space for documenting
		hirm2m4	Helper/Assistant identified and informed for resuscitation MRN2 month4	Number	0=not documented,1=documented,3=no space for documenting
		hirm3m4	Helper/Assistant identified and informed for resuscitation MRN3 month4	Number	0=not documented,1=documented,3=no space for documenting
		hirm4m4	Helper/Assistant identified and informed for resuscitation MRN4 month4	Number	0=not documented,1=documented,3=no space for documenting
		hirm5m4	Helper/Assistant identified and informed for resuscitation MRN5 month4	Number	0=not documented,1=documented,3=no space for documenting
		hirm6m4	Helper/Assistant identified and informed for resuscitation MRN6 month4	Number	0=not documented,1=documented,3=no space for documenting
		hirm7m4	Helper/Assistant identified and informed for resuscitation MRN7 month4	Number	0=not documented,1=documented,3=no space for documenting
		hirm8m4	Helper/Assistant identified and informed for resuscitation MRN8 month4	Number	0=not documented,1=documented,3=no space for documenting
		hirm9m4	Helper/Assistant identified and informed for resuscitation MRN9 month4	Number	0=not documented,1=documented,3=no space for documenting
		hirm10m4	Helper/Assistant identified and informed for resuscitation MRN10 month4	Number	0=not documented,1=documented,3=no space for documenting
		hirtm4	Helper/Assistant identified and informed for resuscitation total month4	Number
		nam1m4	Newborn assessment MRN1 month4	Number	0=not documented,1=documented,3=no space for documenting
		nam2m4	Newborn assessment MRN2 month4	Number	0=not documented,1=documented,3=no space for documenting
		nam3m4	Newborn assessment MRN3 month4	Number	0=not documented,1=documented,3=no space for documenting
		nam4m4	Newborn assessment MRN4 month4	Number	0=not documented,1=documented,3=no space for documenting
		nam5m4	Newborn assessment MRN5 month4	Number	0=not documented,1=documented,3=no space for documenting
		nam6m4	Newborn assessment MRN6 month4	Number	0=not documented,1=documented,3=no space for documenting
		nam7m4	Newborn assessment MRN7 month4	Number	0=not documented,1=documented,3=no space for documenting
		nam8m4	Newborn assessment MRN8 month4	Number	0=not documented,1=documented,3=no space for documenting
		nam9m4	Newborn assessment MRN9 month4	Number	0=not documented,1=documented,3=no space for documenting
		nam10m4	Newborn assessment MRN10 month4	Number	0=not documented,1=documented,3=no space for documenting
		natm4	Newborn assessment total month4	Number
		sks_bm1m4	Immediate skin to skin and initiate breastfeeding within the 1st hour (measured by mother/baby bonding)MRN1 month4	Number	0=not documented,1=documented,3=no space for documenting
		sks_bm2m4	Immediate skin to skin and initiate breastfeeding within the 1st hour (measured by mother/baby bonding)MRN2 month4	Number	0=not documented,1=documented,3=no space for documenting
		sks_bm3m4	Immediate skin to skin and initiate breastfeeding within the 1st hour (measured by mother/baby bonding)MRN3 month4	Number	0=not documented,1=documented,3=no space for documenting
		sks_bm4m4	Immediate skin to skin and initiate breastfeeding within the 1st hour (measured by mother/baby bonding)MRN4 month4	Number	0=not documented,1=documented,3=no space for documenting
		sks_bm5m4	Immediate skin to skin and initiate breastfeeding within the 1st hour (measured by mother/baby bonding)MRN5 month4	Number	0=not documented,1=documented,3=no space for documenting
		sks_bm6m4	Immediate skin to skin and initiate breastfeeding within the 1st hour (measured by mother/baby bonding)MRN6 month4	Number	0=not documented,1=documented,3=no space for documenting
		sks_bm7m4	Immediate skin to skin and initiate breastfeeding within the 1st hour (measured by mother/baby bonding)MRN7 month4	Number	0=not documented,1=documented,3=no space for documenting
		sks_bm8m4	Immediate skin to skin and initiate breastfeeding within the 1st hour (measured by mother/baby bonding)MRN8 month4	Number	0=not documented,1=documented,3=no space for documenting
		sks_bm9m4	Immediate skin to skin and initiate breastfeeding within the 1st hour (measured by mother/baby bonding)MRN9 month4	Number	0=not documented,1=documented,3=no space for documenting
		sks_bm10m4	Immediate skin to skin and initiate breastfeeding within the 1st hour (measured by mother/baby bonding)MRN10 month4	Number	0=not documented,1=documented,3=no space for documenting
		sks_btm4	Immediate skin to skin and initiate breastfeeding within the 1st hour (measured by mother/baby bonding)total month4	Number
		wrm1m4	Baby weighed and recorded MRN1 month4	Number	0=not documented,1=documented,3=no space for documenting
		wrm2m4	Baby weighed and recorded MRN2 month4	Number	0=not documented,1=documented,3=no space for documenting
		wrm3m4	Baby weighed and recorded MRN3 month4	Number	0=not documented,1=documented,3=no space for documenting
		wrm4m4	Baby weighed and recorded MRN4 month4	Number	0=not documented,1=documented,3=no space for documenting
		wrm5m4	Baby weighed and recorded MRN5 month4	Number	0=not documented,1=documented,3=no space for documenting
		wrm6m4	Baby weighed and recorded MRN6 month4	Number	0=not documented,1=documented,3=no space for documenting
		wrm7m4	Baby weighed and recorded MRN7 month4	Number	0=not documented,1=documented,3=no space for documenting
		wrm8m4	Baby weighed and recorded MRN8 month4	Number	0=not documented,1=documented,3=no space for documenting
		wrm9m4	Baby weighed and recorded MRN9 month4	Number	0=not documented,1=documented,3=no space for documenting
		wrm10m4	Baby weighed and recorded MRN10 month4	Number	0=not documented,1=documented,3=no space for documenting
		wrtm4	Baby weighed and recorded total month4	Number	0=not documented,1=documented,3=no space for documenting
		vkm1m4	Administer Vit K1 to newborn MRN1 month4	Number	0=not documented,1=documented,3=no space for documenting
		vkm2m4	Administer Vit K1 to newborn MRN2 month4	Number	0=not documented,1=documented,3=no space for documenting
		vkm3m4	Administer Vit K1 to newborn MRN3 month4	Number	0=not documented,1=documented,3=no space for documenting
		vkm4m4	Administer Vit K1 to newborn MRN4 month4	Number	0=not documented,1=documented,3=no space for documenting
		vkm5m4	Administer Vit K1 to newborn MRN5 month4	Number	0=not documented,1=documented,3=no space for documenting
		vkm6m4	Administer Vit K1 to newborn MRN6 month4	Number	0=not documented,1=documented,3=no space for documenting
		vkm7m4	Administer Vit K1 to newborn MRN7 month4	Number	0=not documented,1=documented,3=no space for documenting
		vkm8m4	Administer Vit K1 to newborn MRN8 month4	Number	0=not documented,1=documented,3=no space for documenting
		vkm9m4	Administer Vit K1 to newborn MRN9 month4	Number	0=not documented,1=documented,3=no space for documenting
		vkm10m4	Administer Vit K1 to newborn MRN10 month4	Number
		vktm4	Administer Vit K1 to newborn total month4	Number	0=not documented,1=documented,3=no space for documenting
		ttm1m4	Administer Tetracycline Eye Ointment to newborn MRN1 month4	Number	0=not documented,1=documented,3=no space for documenting
		ttm2m4	Administer Tetracycline Eye Ointment to newborn MRN2 month4	Number	0=not documented,1=documented,3=no space for documenting
		ttm3m4	Administer Tetracycline Eye Ointment to newborn MRN3 month4	Number	0=not documented,1=documented,3=no space for documenting
		ttm4m4	Administer Tetracycline Eye Ointment to newborn MRN4 month4	Number	0=not documented,1=documented,3=no space for documenting
		ttm5m4	Administer Tetracycline Eye Ointment to newborn MRN5 month4	Number	0=not documented,1=documented,3=no space for documenting
		ttm6m4	Administer Tetracycline Eye Ointment to newborn MRN6 month4	Number	0=not documented,1=documented,3=no space for documenting
		ttm7m4	Administer Tetracycline Eye Ointment to newborn MRN7 month4	Number	0=not documented,1=documented,3=no space for documenting
		ttm8m4	Administer Tetracycline Eye Ointment to newborn MRN8 month4	Number	0=not documented,1=documented,3=no space for documenting
		ttm9m4	Administer Tetracycline Eye Ointment to newborn MRN9 month4	Number	0=not documented,1=documented,3=no space for documenting
		ttm10m4	Administer Tetracycline Eye Ointment to newborn MRN10 month4	Number
		tttm4	Administer Tetracycline Eye Ointment to newborn total month4	Number	0=not documented,1=documented,3=no space for documenting
		tm1m4	Total MRN1 month4	Number	0=not documented,1=documented,3=no space for documenting
		tm2m4	Total MRN2 month4	Number	0=not documented,1=documented,3=no space for documenting
		tm3m4	Total MRN3 month4	Number	0=not documented,1=documented,3=no space for documenting
		tm4m4	Total MRN4 month4	Number	0=not documented,1=documented,3=no space for documenting
		tm5m4	Total MRN5 month4	Number	0=not documented,1=documented,3=no space for documenting
		tm6m4	Total MRN6 month4	Number	0=not documented,1=documented,3=no space for documenting
		tm7m4	Total MRN7 month4	Number	0=not documented,1=documented,3=no space for documenting
		tm8m4	Total MRN8 month4	Number	0=not documented,1=documented,3=no space for documenting
		tm9m4	Total MRN9 month4	Number	0=not documented,1=documented,3=no space for documenting
		tm10m4	Total MRN10 month4	Number
		bpm1m5	BP measured on admission MRN1 month5	Number	0=not documented,1=documented,3=no space for documenting
		bpm2m5	BP measured on admission MRN2 month5	Number	0=not documented,1=documented,3=no space for documenting
		bpm3m5	BP measured on admission MRN3 month5	Number	0=not documented,1=documented,3=no space for documenting
		bpm4m5	BP measured on admission MRN4 month5	Number	0=not documented,1=documented,3=no space for documenting
		bpm5m5	BP measured on admission MRN5 month5	Number	0=not documented,1=documented,3=no space for documenting
		bpm6m5	BP measured on admission MRN6 month5	Number	0=not documented,1=documented,3=no space for documenting
		bpm7m5	BP measured on admission MRN7 month5	Number	0=not documented,1=documented,3=no space for documenting
		bpm8m5	BP measured on admission MRN8 month5	Number	0=not documented,1=documented,3=no space for documenting
		bpm9m5	BP measured on admission MRN9 month5	Number	0=not documented,1=documented,3=no space for documenting
		bpm10m5	BP measured on admission MRN10 month5	Number	0=not documented,1=documented,3=no space for documenting
		bptm5	BP measured on admission total month5	Number
		pm1m5	Partograph started when cervical dilatation at least 4cm MRN1 month5	Number	0=not documented,1=documented,3=no space for documenting
		pm2m5	Partograph started when cervical dilatation at least 4cm MRN2 month5	Number	0=not documented,1=documented,3=no space for documenting
		pm3m5	Partograph started when cervical dilatation at least 4cm MRN3 month5	Number	0=not documented,1=documented,3=no space for documenting
		pm4m5	Partograph started when cervical dilatation at least 4cm MRN4 month5	Number	0=not documented,1=documented,3=no space for documenting
		pm5m5	Partograph started when cervical dilatation at least 4cm MRN5 month5	Number	0=not documented,1=documented,3=no space for documenting
		pm6m5	Partograph started when cervical dilatation at least 4cm MRN6 month5	Number	0=not documented,1=documented,3=no space for documenting
		pm7m5	Partograph started when cervical dilatation at least 4cm MRN7 month5	Number	0=not documented,1=documented,3=no space for documenting
		pm8m5	Partograph started when cervical dilatation at least 4cm MRN8 month5	Number	0=not documented,1=documented,3=no space for documenting
		pm9m5	Partograph started when cervical dilatation at least 4cm MRN9 month5	Number	0=not documented,1=documented,3=no space for documenting
		pm10m5	Partograph started when cervical dilatation at least 4cm MRN10 month5	Number	0=not documented,1=documented,3=no space for documenting
		ptm5	Partograph started when cervical dilatation at least 4cm total month5	Number
		swgm1m5	Availability of soap,water,alcohol hand rub&gloves MRN1 month5	Number	0=not documented,1=documented,3=no space for documenting
		swgm2m5	Availability of soap,water,alcohol hand rub&gloves MRN2 month5	Number	0=not documented,1=documented,3=no space for documenting
		swgm3m5	Availability of soap,water,alcohol hand rub&gloves MRN3 month5	Number	0=not documented,1=documented,3=no space for documenting
		swgm4m5	Availability of soap,water,alcohol hand rub&gloves MRN4 month5	Number	0=not documented,1=documented,3=no space for documenting
		swgm5m5	Availability of soap,water,alcohol hand rub&gloves MRN5 month5	Number	0=not documented,1=documented,3=no space for documenting
		swgm6m5	Availability of soap,water,alcohol hand rub&gloves MRN6 month5	Number	0=not documented,1=documented,3=no space for documenting
		swgm7m5	Availability of soap,water,alcohol hand rub&gloves MRN7 month5	Number	0=not documented,1=documented,3=no space for documenting
		swgm8m5	Availability of soap,water,alcohol hand rub&gloves MRN8 month5	Number	0=not documented,1=documented,3=no space for documenting
		swgm9m5	Availability of soap,water,alcohol hand rub&gloves MRN9 month5	Number	0=not documented,1=documented,3=no space for documenting
		swgm10m5	Availability of soap,water,alcohol hand rub&gloves MRN10 month5	Number	0=not documented,1=documented,3=no space for documenting
		swgtm5	Availability of soap,water,alcohol hand rub&gloves total month5	Number
		bcpm1m5	Birth companion encouraged to be present during labor & birth MRN1 month5	Number	0=not documented,1=documented,3=no space for documenting
		bcpm2m5	Birth companion encouraged to be present during labor & birth MRN2 month5	Number	0=not documented,1=documented,3=no space for documenting
		bcpm3m5	Birth companion encouraged to be present during labor & birth MRN3 month5	Number	0=not documented,1=documented,3=no space for documenting
		bcpm4m5	Birth companion encouraged to be present during labor & birth MRN4 month5	Number	0=not documented,1=documented,3=no space for documenting
		bcpm5m5	Birth companion encouraged to be present during labor & birth MRN5 month5	Number	0=not documented,1=documented,3=no space for documenting
		bcpm6m5	Birth companion encouraged to be present during labor & birth MRN6 month5	Number	0=not documented,1=documented,3=no space for documenting
		bcpm7m5	Birth companion encouraged to be present during labor & birth MRN7 month5	Number	0=not documented,1=documented,3=no space for documenting
		bcpm8m5	Birth companion encouraged to be present during labor & birth MRN8 month5	Number	0=not documented,1=documented,3=no space for documenting
		bcpm9m5	Birth companion encouraged to be present during labor & birth MRN9 month5	Number	0=not documented,1=documented,3=no space for documenting
		bcpm10m5	Birth companion encouraged to be present during labor & birth MRN10 month5	Number	0=not documented,1=documented,3=no space for documenting
		bcptm5	Birth companion encouraged to be present during labor & birth total month5	Number
		mpm1m5	mothers privacy maintained during labor and delivery MRN1 month5	Number	0=not documented,1=documented,3=no space for documenting
		mpm2m5	mothers privacy maintained during labor and delivery MRN2 month5	Number	0=not documented,1=documented,3=no space for documenting
		mpm3m5	mothers privacy maintained during labor and delivery MRN3 month5	Number	0=not documented,1=documented,3=no space for documenting
		mpm4m5	mothers privacy maintained during labor and delivery MRN4 month5	Number	0=not documented,1=documented,3=no space for documenting
		mpm5m5	mothers privacy maintained during labor and delivery MRN5 month5	Number	0=not documented,1=documented,3=no space for documenting
		mpm6m5	mothers privacy maintained during labor and delivery MRN6 month5	Number	0=not documented,1=documented,3=no space for documenting
		mpm7m5	mothers privacy maintained during labor and delivery MRN7 month5	Number	0=not documented,1=documented,3=no space for documenting
		mpm8m5	mothers privacy maintained during labor and delivery MRN8 month5	Number	0=not documented,1=documented,3=no space for documenting
		mpm9m5	mothers privacy maintained during labor and delivery MRN9 month5	Number	0=not documented,1=documented,3=no space for documenting
		mpm10m5	mothers privacy maintained during labor and delivery MRN10 month5	Number	0=not documented,1=documented,3=no space for documenting
		mpmtm5	mothers privacy maintained during labor and delivery total month5	Number
		a_gswm1m5	Availability of gloves,soap/savlon&clean water MRN1 month5	Number	0=not documented,1=documented,3=no space for documenting
		a_gswm2m5	Availability of gloves,soap/savlon&clean water MRN2 month5	Number	0=not documented,1=documented,3=no space for documenting
		a_gswm3m5	Availability of gloves,soap/savlon&clean water MRN3 month5	Number	0=not documented,1=documented,3=no space for documenting
		a_gswm4m5	Availability of gloves,soap/savlon&clean water MRN4 month5	Number	0=not documented,1=documented,3=no space for documenting
		a_gswm5m5	Availability of gloves,soap/savlon&clean water MRN5 month5	Number	0=not documented,1=documented,3=no space for documenting
		a_gswm6m5	Availability of gloves,soap/savlon&clean water MRN6 month5	Number	0=not documented,1=documented,3=no space for documenting
		a_gswm7m5	Availability of gloves,soap/savlon&clean water MRN7 month5	Number	0=not documented,1=documented,3=no space for documenting
		a_gswm8m5	Availability of gloves,soap/savlon&clean water MRN8 month5	Number	0=not documented,1=documented,3=no space for documenting
		a_gswm9m5	Availability of gloves,soap/savlon&clean water MRN9 month5	Number	0=not documented,1=documented,3=no space for documenting
		a_gswm10m5	Availability of gloves,soap/savlon&clean water MRN10 month5	Number	0=not documented,1=documented,3=no space for documenting
		a_gswtm5	Availability of gloves,soap/savlon&clean water total month5	Number
		pusm1m5	Preparation of 10 IU IV/IM uterotonic syringeMRN1 month5	Number	0=not documented,1=documented,3=no space for documenting
		pusm2m5	Preparation of 10 IU IV/IM uterotonic syringeMRN2 month5	Number	0=not documented,1=documented,3=no space for documenting
		pusm3m5	Preparation of 10 IU IV/IM uterotonic syringeMRN3 month5	Number	0=not documented,1=documented,3=no space for documenting
		pusm4m5	Preparation of 10 IU IV/IM uterotonic syringeMRN4 month5	Number	0=not documented,1=documented,3=no space for documenting
		pusm5m5	Preparation of 10 IU IV/IM uterotonic syringeMRN5 month5	Number	0=not documented,1=documented,3=no space for documenting
		pusm6m5	Preparation of 10 IU IV/IM uterotonic syringeMRN6 month5	Number	0=not documented,1=documented,3=no space for documenting
		pusm7m5	Preparation of 10 IU IV/IM uterotonic syringeMRN7 month5	Number	0=not documented,1=documented,3=no space for documenting
		pusm8m5	Preparation of 10 IU IV/IM uterotonic syringeMRN8 month5	Number	0=not documented,1=documented,3=no space for documenting
		pusm9m5	Preparation of 10 IU IV/IM uterotonic syringeMRN9 month5	Number	0=not documented,1=documented,3=no space for documenting
		pusm10m5	Preparation of 10 IU IV/IM uterotonic syringeMRN10 month5	Number	0=not documented,1=documented,3=no space for documenting
		pustm5	Preparation of 10 IU IV/IM uterotonic syringetotal month5	Number
		a_tsm1m5	Availability of two clean,dry,warm towels&suction device MRN1 month5	Number	0=not documented,1=documented,3=no space for documenting
		a_tsm2m5	Availability of two clean,dry,warm towels&suction device MRN2 month5	Number	0=not documented,1=documented,3=no space for documenting
		a_tsm3m5	Availability of two clean,dry,warm towels&suction device MRN3 month5	Number	0=not documented,1=documented,3=no space for documenting
		a_tsm4m5	Availability of two clean,dry,warm towels&suction device MRN4 month5	Number	0=not documented,1=documented,3=no space for documenting
		a_tsm5m5	Availability of two clean,dry,warm towels&suction device MRN5 month5	Number	0=not documented,1=documented,3=no space for documenting
		a_tsm6m5	Availability of two clean,dry,warm towels&suction device MRN6 month5	Number	0=not documented,1=documented,3=no space for documenting
		a_tsm7m5	Availability of two clean,dry,warm towels&suction device MRN7 month5	Number	0=not documented,1=documented,3=no space for documenting
		a_tsm8m5	Availability of two clean,dry,warm towels&suction device MRN8 month5	Number	0=not documented,1=documented,3=no space for documenting
		a_tsm9m5	Availability of two clean,dry,warm towels&suction device MRN9 month5	Number	0=not documented,1=documented,3=no space for documenting
		a_tsm10m5	Availability of two clean,dry,warm towels&suction device MRN10 month5	Number	0=not documented,1=documented,3=no space for documenting
		a_tstm5	Availability of two clean,dry,warm towels&suction device total month5	Number
		a_bmm1m5	Availability of bag and mask (size 0 and 1) MRN1 month5	Number	0=not documented,1=documented,3=no space for documenting
		a_bmm2m5	Availability of bag and mask (size 0 and 1) MRN2 month5	Number	0=not documented,1=documented,3=no space for documenting
		a_bmm3m5	Availability of bag and mask (size 0 and 1) MRN3 month5	Number	0=not documented,1=documented,3=no space for documenting
		a_bmm4m5	Availability of bag and mask (size 0 and 1) MRN4 month5	Number	0=not documented,1=documented,3=no space for documenting
		a_bmm5m5	Availability of bag and mask (size 0 and 1) MRN5 month5	Number	0=not documented,1=documented,3=no space for documenting
		a_bmm6m5	Availability of bag and mask (size 0 and 1) MRN6 month5	Number	0=not documented,1=documented,3=no space for documenting
		a_bmm7m5	Availability of bag and mask (size 0 and 1) MRN7 month5	Number	0=not documented,1=documented,3=no space for documenting
		a_bmm8m5	Availability of bag and mask (size 0 and 1) MRN8 month5	Number	0=not documented,1=documented,3=no space for documenting
		a_bmm9m5	Availability of bag and mask (size 0 and 1) MRN9 month5	Number	0=not documented,1=documented,3=no space for documenting
		a_bmm10m5	Availability of bag and mask (size 0 and 1) MRN10 month5	Number	0=not documented,1=documented,3=no space for documenting
		a_bmtm5	Availability of bag and mask (size 0 and 1) total month5	Number
		hirm1m5	Helper/Assistant identified and informed for resuscitation MRN1 month5	Number	0=not documented,1=documented,3=no space for documenting
		hirm2m5	Helper/Assistant identified and informed for resuscitation MRN2 month5	Number	0=not documented,1=documented,3=no space for documenting
		hirm3m5	Helper/Assistant identified and informed for resuscitation MRN3 month5	Number	0=not documented,1=documented,3=no space for documenting
		hirm4m5	Helper/Assistant identified and informed for resuscitation MRN4 month5	Number	0=not documented,1=documented,3=no space for documenting
		hirm5m5	Helper/Assistant identified and informed for resuscitation MRN5 month5	Number	0=not documented,1=documented,3=no space for documenting
		hirm6m5	Helper/Assistant identified and informed for resuscitation MRN6 month5	Number	0=not documented,1=documented,3=no space for documenting
		hirm7m5	Helper/Assistant identified and informed for resuscitation MRN7 month5	Number	0=not documented,1=documented,3=no space for documenting
		hirm8m5	Helper/Assistant identified and informed for resuscitation MRN8 month5	Number	0=not documented,1=documented,3=no space for documenting
		hirm9m5	Helper/Assistant identified and informed for resuscitation MRN9 month5	Number	0=not documented,1=documented,3=no space for documenting
		hirm10m5	Helper/Assistant identified and informed for resuscitation MRN10 month5	Number	0=not documented,1=documented,3=no space for documenting
		hirtm5	Helper/Assistant identified and informed for resuscitation total month5	Number
		nam1m5	Newborn assessment MRN1 month5	Number	0=not documented,1=documented,3=no space for documenting
		nam2m5	Newborn assessment MRN2 month5	Number	0=not documented,1=documented,3=no space for documenting
		nam3m5	Newborn assessment MRN3 month5	Number	0=not documented,1=documented,3=no space for documenting
		nam4m5	Newborn assessment MRN4 month5	Number	0=not documented,1=documented,3=no space for documenting
		nam5m5	Newborn assessment MRN5 month5	Number	0=not documented,1=documented,3=no space for documenting
		nam6m5	Newborn assessment MRN6 month5	Number	0=not documented,1=documented,3=no space for documenting
		nam7m5	Newborn assessment MRN7 month5	Number	0=not documented,1=documented,3=no space for documenting
		nam8m5	Newborn assessment MRN8 month5	Number	0=not documented,1=documented,3=no space for documenting
		nam9m5	Newborn assessment MRN9 month5	Number	0=not documented,1=documented,3=no space for documenting
		nam10m5	Newborn assessment MRN10 month5	Number	0=not documented,1=documented,3=no space for documenting
		natm5	Newborn assessment total month5	Number
		sks_bm1m5	Immediate skin to skin and initiate breastfeeding within the 1st hour (measured by mother/baby bonding)MRN1 month5	Number	0=not documented,1=documented,3=no space for documenting
		sks_bm2m5	Immediate skin to skin and initiate breastfeeding within the 1st hour (measured by mother/baby bonding)MRN2 month5	Number	0=not documented,1=documented,3=no space for documenting
		sks_bm3m5	Immediate skin to skin and initiate breastfeeding within the 1st hour (measured by mother/baby bonding)MRN3 month5	Number	0=not documented,1=documented,3=no space for documenting
		sks_bm4m5	Immediate skin to skin and initiate breastfeeding within the 1st hour (measured by mother/baby bonding)MRN4 month5	Number	0=not documented,1=documented,3=no space for documenting
		sks_bm5m5	Immediate skin to skin and initiate breastfeeding within the 1st hour (measured by mother/baby bonding)MRN5 month5	Number	0=not documented,1=documented,3=no space for documenting
		sks_bm6m5	Immediate skin to skin and initiate breastfeeding within the 1st hour (measured by mother/baby bonding)MRN6 month5	Number	0=not documented,1=documented,3=no space for documenting
		sks_bm7m5	Immediate skin to skin and initiate breastfeeding within the 1st hour (measured by mother/baby bonding)MRN7 month5	Number	0=not documented,1=documented,3=no space for documenting
		sks_bm8m5	Immediate skin to skin and initiate breastfeeding within the 1st hour (measured by mother/baby bonding)MRN8 month5	Number	0=not documented,1=documented,3=no space for documenting
		sks_bm9m5	Immediate skin to skin and initiate breastfeeding within the 1st hour (measured by mother/baby bonding)MRN9 month5	Number	0=not documented,1=documented,3=no space for documenting
		sks_bm10m5	Immediate skin to skin and initiate breastfeeding within the 1st hour (measured by mother/baby bonding)MRN10 month5	Number	0=not documented,1=documented,3=no space for documenting
		sks_btm5	Immediate skin to skin and initiate breastfeeding within the 1st hour (measured by mother/baby bonding)total month5	Number	0=not documented,1=documented,3=no space for documenting
		wrm1m5	Baby weighed and recorded MRN1 month5	Number	0=not documented,1=documented,3=no space for documenting
		wrm2m5	Baby weighed and recorded MRN2 month5	Number	0=not documented,1=documented,3=no space for documenting
		wrm3m5	Baby weighed and recorded MRN3 month5	Number	0=not documented,1=documented,3=no space for documenting
		wrm4m5	Baby weighed and recorded MRN4 month5	Number	0=not documented,1=documented,3=no space for documenting
		wrm5m5	Baby weighed and recorded MRN5 month5	Number	0=not documented,1=documented,3=no space for documenting
		wrm6m5	Baby weighed and recorded MRN6 month5	Number	0=not documented,1=documented,3=no space for documenting
		wrm7m5	Baby weighed and recorded MRN7 month5	Number	0=not documented,1=documented,3=no space for documenting
		wrm8m5	Baby weighed and recorded MRN8 month5	Number	0=not documented,1=documented,3=no space for documenting
		wrm9m5	Baby weighed and recorded MRN9 month5	Number	0=not documented,1=documented,3=no space for documenting
		wrm10m5	Baby weighed and recorded MRN10 month5	Number
		wrtm5	Baby weighed and recorded total month5	Number	0=not documented,1=documented,3=no space for documenting
		vkm1m5	Administer Vit K1 to newborn MRN1 month5	Number	0=not documented,1=documented,3=no space for documenting
		vkm2m5	Administer Vit K1 to newborn MRN2 month5	Number	0=not documented,1=documented,3=no space for documenting
		vkm3m5	Administer Vit K1 to newborn MRN3 month5	Number	0=not documented,1=documented,3=no space for documenting
		vkm4m5	Administer Vit K1 to newborn MRN4 month5	Number	0=not documented,1=documented,3=no space for documenting
		vkm5m5	Administer Vit K1 to newborn MRN5 month5	Number	0=not documented,1=documented,3=no space for documenting
		vkm6m5	Administer Vit K1 to newborn MRN6 month5	Number	0=not documented,1=documented,3=no space for documenting
		vkm7m5	Administer Vit K1 to newborn MRN7 month5	Number	0=not documented,1=documented,3=no space for documenting
		vkm8m5	Administer Vit K1 to newborn MRN8 month5	Number	0=not documented,1=documented,3=no space for documenting
		vkm9m5	Administer Vit K1 to newborn MRN9 month5	Number	0=not documented,1=documented,3=no space for documenting
		vkm10m5	Administer Vit K1 to newborn MRN10 month5	Number
		vktm5	Administer Vit K1 to newborn total month5	Number	0=not documented,1=documented,3=no space for documenting
		ttm1m5	Administer Tetracycline Eye Ointment to newborn MRN1 month5	Number	0=not documented,1=documented,3=no space for documenting
		ttm2m5	Administer Tetracycline Eye Ointment to newborn MRN2 month5	Number	0=not documented,1=documented,3=no space for documenting
		ttm3m5	Administer Tetracycline Eye Ointment to newborn MRN3 month5	Number	0=not documented,1=documented,3=no space for documenting
		ttm4m5	Administer Tetracycline Eye Ointment to newborn MRN4 month5	Number	0=not documented,1=documented,3=no space for documenting
		ttm5m5	Administer Tetracycline Eye Ointment to newborn MRN5 month5	Number	0=not documented,1=documented,3=no space for documenting
		ttm6m5	Administer Tetracycline Eye Ointment to newborn MRN6 month5	Number	0=not documented,1=documented,3=no space for documenting
		ttm7m5	Administer Tetracycline Eye Ointment to newborn MRN7 month5	Number	0=not documented,1=documented,3=no space for documenting
		ttm8m5	Administer Tetracycline Eye Ointment to newborn MRN8 month5	Number	0=not documented,1=documented,3=no space for documenting
		ttm9m5	Administer Tetracycline Eye Ointment to newborn MRN9 month5	Number	0=not documented,1=documented,3=no space for documenting
		ttm10m5	Administer Tetracycline Eye Ointment to newborn MRN10 month5	Number
		tttm5	Administer Tetracycline Eye Ointment to newborn total month5	Number	0=not documented,1=documented,3=no space for documenting
		tm1m5	Total MRN1 month5	Number	0=not documented,1=documented,3=no space for documenting
		tm2m5	Total MRN2 month5	Number	0=not documented,1=documented,3=no space for documenting
		tm3m5	Total MRN3 month5	Number	0=not documented,1=documented,3=no space for documenting
		tm4m5	Total MRN4 month5	Number	0=not documented,1=documented,3=no space for documenting
		tm5m5	Total MRN5 month5	Number	0=not documented,1=documented,3=no space for documenting
		tm6m5	Total MRN6 month5	Number	0=not documented,1=documented,3=no space for documenting
		tm7m5	Total MRN7 month5	Number	0=not documented,1=documented,3=no space for documenting
		tm8m5	Total MRN8 month5	Number	0=not documented,1=documented,3=no space for documenting
		tm9m5	Total MRN9 month5	Number	0=not documented,1=documented,3=no space for documenting
		tm10m5	Total MRN10 month5	Number
		bpm1m6	BP measured on admission MRN1 month6	Number	0=not documented,1=documented,3=no space for documenting
		bpm2m6	BP measured on admission MRN2 month6	Number	0=not documented,1=documented,3=no space for documenting
		bpm3m6	BP measured on admission MRN3 month6	Number	0=not documented,1=documented,3=no space for documenting
		bpm4m6	BP measured on admission MRN4 month6	Number	0=not documented,1=documented,3=no space for documenting
		bpm5m6	BP measured on admission MRN5 month6	Number	0=not documented,1=documented,3=no space for documenting
		bpm6m6	BP measured on admission MRN6 month6	Number	0=not documented,1=documented,3=no space for documenting
		bpm7m6	BP measured on admission MRN7 month6	Number	0=not documented,1=documented,3=no space for documenting
		bpm8m6	BP measured on admission MRN8 month6	Number	0=not documented,1=documented,3=no space for documenting
		bpm9m6	BP measured on admission MRN9 month6	Number	0=not documented,1=documented,3=no space for documenting
		bpm10m6	BP measured on admission MRN10 month6	Number	0=not documented,1=documented,3=no space for documenting
		bptm6	BP measured on admission total month6	Number
		pm1m6	Partograph started when cervical dilatation at least 4cm MRN1 month6	Number	0=not documented,1=documented,3=no space for documenting
		pm2m6	Partograph started when cervical dilatation at least 4cm MRN2 month6	Number	0=not documented,1=documented,3=no space for documenting
		pm3m6	Partograph started when cervical dilatation at least 4cm MRN3 month6	Number	0=not documented,1=documented,3=no space for documenting
		pm4m6	Partograph started when cervical dilatation at least 4cm MRN4 month6	Number	0=not documented,1=documented,3=no space for documenting
		pm5m6	Partograph started when cervical dilatation at least 4cm MRN5 month6	Number	0=not documented,1=documented,3=no space for documenting
		pm6m6	Partograph started when cervical dilatation at least 4cm MRN6 month6	Number	0=not documented,1=documented,3=no space for documenting
		pm7m6	Partograph started when cervical dilatation at least 4cm MRN7 month6	Number	0=not documented,1=documented,3=no space for documenting
		pm8m6	Partograph started when cervical dilatation at least 4cm MRN8 month6	Number	0=not documented,1=documented,3=no space for documenting
		pm9m6	Partograph started when cervical dilatation at least 4cm MRN9 month6	Number	0=not documented,1=documented,3=no space for documenting
		pm10m6	Partograph started when cervical dilatation at least 4cm MRN10 month6	Number	0=not documented,1=documented,3=no space for documenting
		ptm6	Partograph started when cervical dilatation at least 4cm total month6	Number
		swgm1m6	Availability of soap,water,alcohol hand rub&gloves MRN1 month6	Number	0=not documented,1=documented,3=no space for documenting
		swgm2m6	Availability of soap,water,alcohol hand rub&gloves MRN2 month6	Number	0=not documented,1=documented,3=no space for documenting
		swgm3m6	Availability of soap,water,alcohol hand rub&gloves MRN3 month6	Number	0=not documented,1=documented,3=no space for documenting
		swgm4m6	Availability of soap,water,alcohol hand rub&gloves MRN4 month6	Number	0=not documented,1=documented,3=no space for documenting
		swgm5m6	Availability of soap,water,alcohol hand rub&gloves MRN5 month6	Number	0=not documented,1=documented,3=no space for documenting
		swgm6m6	Availability of soap,water,alcohol hand rub&gloves MRN6 month6	Number	0=not documented,1=documented,3=no space for documenting
		swgm7m6	Availability of soap,water,alcohol hand rub&gloves MRN7 month6	Number	0=not documented,1=documented,3=no space for documenting
		swgm8m6	Availability of soap,water,alcohol hand rub&gloves MRN8 month6	Number	0=not documented,1=documented,3=no space for documenting
		swgm9m6	Availability of soap,water,alcohol hand rub&gloves MRN9 month6	Number	0=not documented,1=documented,3=no space for documenting
		swgm10m6	Availability of soap,water,alcohol hand rub&gloves MRN10 month6	Number	0=not documented,1=documented,3=no space for documenting
		swgtm6	Availability of soap,water,alcohol hand rub&gloves total month6	Number
		bcpm1m6	Birth companion encouraged to be present during labor & birth MRN1 month6	Number	0=not documented,1=documented,3=no space for documenting
		bcpm2m6	Birth companion encouraged to be present during labor & birth MRN2 month6	Number	0=not documented,1=documented,3=no space for documenting
		bcpm3m6	Birth companion encouraged to be present during labor & birth MRN3 month6	Number	0=not documented,1=documented,3=no space for documenting
		bcpm4m6	Birth companion encouraged to be present during labor & birth MRN4 month6	Number	0=not documented,1=documented,3=no space for documenting
		bcpm5m6	Birth companion encouraged to be present during labor & birth MRN5 month6	Number	0=not documented,1=documented,3=no space for documenting
		bcpm6m6	Birth companion encouraged to be present during labor & birth MRN6 month6	Number	0=not documented,1=documented,3=no space for documenting
		bcpm7m6	Birth companion encouraged to be present during labor & birth MRN7 month6	Number	0=not documented,1=documented,3=no space for documenting
		bcpm8m6	Birth companion encouraged to be present during labor & birth MRN8 month6	Number	0=not documented,1=documented,3=no space for documenting
		bcpm9m6	Birth companion encouraged to be present during labor & birth MRN9 month6	Number	0=not documented,1=documented,3=no space for documenting
		bcpm10m6	Birth companion encouraged to be present during labor & birth MRN10 month6	Number	0=not documented,1=documented,3=no space for documenting
		bcptm6	Birth companion encouraged to be present during labor & birth total month6	Number
		mpm1m6	mothers privacy maintained during labor and delivery MRN1 month6	Number	0=not documented,1=documented,3=no space for documenting
		mpm2m6	mothers privacy maintained during labor and delivery MRN2 month6	Number	0=not documented,1=documented,3=no space for documenting
		mpm3m6	mothers privacy maintained during labor and delivery MRN3 month6	Number	0=not documented,1=documented,3=no space for documenting
		mpm4m6	mothers privacy maintained during labor and delivery MRN4 month6	Number	0=not documented,1=documented,3=no space for documenting
		mpm5m6	mothers privacy maintained during labor and delivery MRN5 month6	Number	0=not documented,1=documented,3=no space for documenting
		mpm6m6	mothers privacy maintained during labor and delivery MRN6 month6	Number	0=not documented,1=documented,3=no space for documenting
		mpm7m6	mothers privacy maintained during labor and delivery MRN7 month6	Number	0=not documented,1=documented,3=no space for documenting
		mpm8m6	mothers privacy maintained during labor and delivery MRN8 month6	Number	0=not documented,1=documented,3=no space for documenting
		mpm9m6	mothers privacy maintained during labor and delivery MRN9 month6	Number	0=not documented,1=documented,3=no space for documenting
		mpm10m6	mothers privacy maintained during labor and delivery MRN10 month6	Number	0=not documented,1=documented,3=no space for documenting
		mpmtm6	mothers privacy maintained during labor and delivery total month6	Number
		a_gswm1m6	Availability of gloves,soap/savlon&clean water MRN1 month6	Number	0=not documented,1=documented,3=no space for documenting
		a_gswm2m6	Availability of gloves,soap/savlon&clean water MRN2 month6	Number	0=not documented,1=documented,3=no space for documenting
		a_gswm3m6	Availability of gloves,soap/savlon&clean water MRN3 month6	Number	0=not documented,1=documented,3=no space for documenting
		a_gswm4m6	Availability of gloves,soap/savlon&clean water MRN4 month6	Number	0=not documented,1=documented,3=no space for documenting
		a_gswm5m6	Availability of gloves,soap/savlon&clean water MRN5 month6	Number	0=not documented,1=documented,3=no space for documenting
		a_gswm6m6	Availability of gloves,soap/savlon&clean water MRN6 month6	Number	0=not documented,1=documented,3=no space for documenting
		a_gswm7m6	Availability of gloves,soap/savlon&clean water MRN7 month6	Number	0=not documented,1=documented,3=no space for documenting
		a_gswm8m6	Availability of gloves,soap/savlon&clean water MRN8 month6	Number	0=not documented,1=documented,3=no space for documenting
		a_gswm9m6	Availability of gloves,soap/savlon&clean water MRN9 month6	Number	0=not documented,1=documented,3=no space for documenting
		a_gswm10m6	Availability of gloves,soap/savlon&clean water MRN10 month6	Number	0=not documented,1=documented,3=no space for documenting
		a_gswtm6	Availability of gloves,soap/savlon&clean water total month6	Number
		pusm1m6	Preparation of 10 IU IV/IM uterotonic syringeMRN1 month6	Number	0=not documented,1=documented,3=no space for documenting
		pusm2m6	Preparation of 10 IU IV/IM uterotonic syringeMRN2 month6	Number	0=not documented,1=documented,3=no space for documenting
		pusm3m6	Preparation of 10 IU IV/IM uterotonic syringeMRN3 month6	Number	0=not documented,1=documented,3=no space for documenting
		pusm4m6	Preparation of 10 IU IV/IM uterotonic syringeMRN4 month6	Number	0=not documented,1=documented,3=no space for documenting
		pusm5m6	Preparation of 10 IU IV/IM uterotonic syringeMRN5 month6	Number	0=not documented,1=documented,3=no space for documenting
		pusm6m6	Preparation of 10 IU IV/IM uterotonic syringeMRN6 month6	Number	0=not documented,1=documented,3=no space for documenting
		pusm7m6	Preparation of 10 IU IV/IM uterotonic syringeMRN7 month6	Number	0=not documented,1=documented,3=no space for documenting
		pusm8m6	Preparation of 10 IU IV/IM uterotonic syringeMRN8 month6	Number	0=not documented,1=documented,3=no space for documenting
		pusm9m6	Preparation of 10 IU IV/IM uterotonic syringeMRN9 month6	Number	0=not documented,1=documented,3=no space for documenting
		pusm10m6	Preparation of 10 IU IV/IM uterotonic syringeMRN10 month6	Number	0=not documented,1=documented,3=no space for documenting
		pustm6	Preparation of 10 IU IV/IM uterotonic syringetotal month6	Number
		a_tsm1m6	Availability of two clean,dry,warm towels&suction device MRN1 month6	Number	0=not documented,1=documented,3=no space for documenting
		a_tsm2m6	Availability of two clean,dry,warm towels&suction device MRN2 month6	Number	0=not documented,1=documented,3=no space for documenting
		a_tsm3m6	Availability of two clean,dry,warm towels&suction device MRN3 month6	Number	0=not documented,1=documented,3=no space for documenting
		a_tsm4m6	Availability of two clean,dry,warm towels&suction device MRN4 month6	Number	0=not documented,1=documented,3=no space for documenting
		a_tsm5m6	Availability of two clean,dry,warm towels&suction device MRN5 month6	Number	0=not documented,1=documented,3=no space for documenting
		a_tsm6m6	Availability of two clean,dry,warm towels&suction device MRN6 month6	Number	0=not documented,1=documented,3=no space for documenting
		a_tsm7m6	Availability of two clean,dry,warm towels&suction device MRN7 month6	Number	0=not documented,1=documented,3=no space for documenting
		a_tsm8m6	Availability of two clean,dry,warm towels&suction device MRN8 month6	Number	0=not documented,1=documented,3=no space for documenting
		a_tsm9m6	Availability of two clean,dry,warm towels&suction device MRN9 month6	Number	0=not documented,1=documented,3=no space for documenting
		a_tsm10m6	Availability of two clean,dry,warm towels&suction device MRN10 month6	Number	0=not documented,1=documented,3=no space for documenting
		a_tstm6	Availability of two clean,dry,warm towels&suction device total month6	Number
		a_bmm1m6	Availability of bag and mask (size 0 and 1) MRN1 month6	Number	0=not documented,1=documented,3=no space for documenting
		a_bmm2m6	Availability of bag and mask (size 0 and 1) MRN2 month6	Number	0=not documented,1=documented,3=no space for documenting
		a_bmm3m6	Availability of bag and mask (size 0 and 1) MRN3 month6	Number	0=not documented,1=documented,3=no space for documenting
		a_bmm4m6	Availability of bag and mask (size 0 and 1) MRN4 month6	Number	0=not documented,1=documented,3=no space for documenting
		a_bmm5m6	Availability of bag and mask (size 0 and 1) MRN5 month6	Number	0=not documented,1=documented,3=no space for documenting
		a_bmm6m6	Availability of bag and mask (size 0 and 1) MRN6 month6	Number	0=not documented,1=documented,3=no space for documenting
		a_bmm7m6	Availability of bag and mask (size 0 and 1) MRN7 month6	Number	0=not documented,1=documented,3=no space for documenting
		a_bmm8m6	Availability of bag and mask (size 0 and 1) MRN8 month6	Number	0=not documented,1=documented,3=no space for documenting
		a_bmm9m6	Availability of bag and mask (size 0 and 1) MRN9 month6	Number	0=not documented,1=documented,3=no space for documenting
		a_bmm10m6	Availability of bag and mask (size 0 and 1) MRN10 month6	Number	0=not documented,1=documented,3=no space for documenting
		a_bmtm6	Availability of bag and mask (size 0 and 1) total month6	Number
		hirm1m6	Helper/Assistant identified and informed for resuscitation MRN1 month6	Number	0=not documented,1=documented,3=no space for documenting
		hirm2m6	Helper/Assistant identified and informed for resuscitation MRN2 month6	Number	0=not documented,1=documented,3=no space for documenting
		hirm3m6	Helper/Assistant identified and informed for resuscitation MRN3 month6	Number	0=not documented,1=documented,3=no space for documenting
		hirm4m6	Helper/Assistant identified and informed for resuscitation MRN4 month6	Number	0=not documented,1=documented,3=no space for documenting
		hirm5m6	Helper/Assistant identified and informed for resuscitation MRN5 month6	Number	0=not documented,1=documented,3=no space for documenting
		hirm6m6	Helper/Assistant identified and informed for resuscitation MRN6 month6	Number	0=not documented,1=documented,3=no space for documenting
		hirm7m6	Helper/Assistant identified and informed for resuscitation MRN7 month6	Number	0=not documented,1=documented,3=no space for documenting
		hirm8m6	Helper/Assistant identified and informed for resuscitation MRN8 month6	Number	0=not documented,1=documented,3=no space for documenting
		hirm9m6	Helper/Assistant identified and informed for resuscitation MRN9 month6	Number	0=not documented,1=documented,3=no space for documenting
		hirm10m6	Helper/Assistant identified and informed for resuscitation MRN10 month6	Number	0=not documented,1=documented,3=no space for documenting
		hirtm6	Helper/Assistant identified and informed for resuscitation total month6	Number
		nam1m6	Newborn assessment MRN1 month6	Number	0=not documented,1=documented,3=no space for documenting
		nam2m6	Newborn assessment MRN2 month6	Number	0=not documented,1=documented,3=no space for documenting
		nam3m6	Newborn assessment MRN3 month6	Number	0=not documented,1=documented,3=no space for documenting
		nam4m6	Newborn assessment MRN4 month6	Number	0=not documented,1=documented,3=no space for documenting
		nam5m6	Newborn assessment MRN5 month6	Number	0=not documented,1=documented,3=no space for documenting
		nam6m6	Newborn assessment MRN6 month6	Number	0=not documented,1=documented,3=no space for documenting
		nam7m6	Newborn assessment MRN7 month6	Number	0=not documented,1=documented,3=no space for documenting
		nam8m6	Newborn assessment MRN8 month6	Number	0=not documented,1=documented,3=no space for documenting
		nam9m6	Newborn assessment MRN9 month6	Number	0=not documented,1=documented,3=no space for documenting
		nam10m6	Newborn assessment MRN10 month6	Number	0=not documented,1=documented,3=no space for documenting
		natm6	Newborn assessment total month6
		sks_bm1m6	Immediate skin to skin and initiate breastfeeding within the 1st hour (measured by mother/baby bonding)MRN1 month6			Use text not numbers to make it uniform(Eg. Every month)
		sks_bm2m6	Immediate skin to skin and initiate breastfeeding within the 1st hour (measured by mother/baby bonding)MRN2 month6
		sks_bm3m6	Immediate skin to skin and initiate breastfeeding within the 1st hour (measured by mother/baby bonding)MRN3 month6
		sks_bm4m6	Immediate skin to skin and initiate breastfeeding within the 1st hour (measured by mother/baby bonding)MRN4 month6
		sks_bm5m6	Immediate skin to skin and initiate breastfeeding within the 1st hour (measured by mother/baby bonding)MRN5 month6
		sks_bm6m6	Immediate skin to skin and initiate breastfeeding within the 1st hour (measured by mother/baby bonding)MRN6 month6
		sks_bm7m6	Immediate skin to skin and initiate breastfeeding within the 1st hour (measured by mother/baby bonding)MRN7 month6
		sks_bm8m6	Immediate skin to skin and initiate breastfeeding within the 1st hour (measured by mother/baby bonding)MRN8 month6
		sks_bm9m6	Immediate skin to skin and initiate breastfeeding within the 1st hour (measured by mother/baby bonding)MRN9 month6
		sks_bm10m6	Immediate skin to skin and initiate breastfeeding within the 1st hour (measured by mother/baby bonding)MRN10 month6
		sks_btm6	Immediate skin to skin and initiate breastfeeding within the 1st hour (measured by mother/baby bonding)total month6
		wrm1m6	Baby weighed and recorded MRN1 month6
		wrm2m6	Baby weighed and recorded MRN2 month6
		wrm3m6	Baby weighed and recorded MRN3 month6
		wrm4m6	Baby weighed and recorded MRN4 month6
		wrm5m6	Baby weighed and recorded MRN5 month6
		wrm6m6	Baby weighed and recorded MRN6 month6
		wrm7m6	Baby weighed and recorded MRN7 month6
		wrm8m6	Baby weighed and recorded MRN8 month6
		wrm9m6	Baby weighed and recorded MRN9 month6
		wrm10m6	Baby weighed and recorded MRN10 month6
		wrtm6	Baby weighed and recorded total month6
		vkm1m6	Administer Vit K1 to newborn MRN1 month6
		vkm2m6	Administer Vit K1 to newborn MRN2 month6
		vkm3m6	Administer Vit K1 to newborn MRN3 month6
		vkm4m6	Administer Vit K1 to newborn MRN4 month6
		vkm5m6	Administer Vit K1 to newborn MRN5 month6
		vkm6m6	Administer Vit K1 to newborn MRN6 month6
		vkm7m6	Administer Vit K1 to newborn MRN7 month6
		vkm8m6	Administer Vit K1 to newborn MRN8 month6
		vkm9m6	Administer Vit K1 to newborn MRN9 month6
[truncated: 29 more rows]
